# Supplementary material for: Dinuclear zinc catalyzed asymmetric [3 + 2] spiroannulation for the synthesis of diverse bispirocyclic saccharines
Source: Royal Society of Chemistry journal article supplement (doi:10.1039/d2qo01039a), 2022-01-01
Supplement: d2qo01039a1.pdf [file d2qo01039a1.pdf]

## Supporting Information

# **Dinuclear zinc catalyzed asymmetric [3 + 2] spiroannulation for the synthesis of diverse bispirocyclic saccharines**

College of Chemistry and Institute of Green Catalysis, Zhengzhou University, Zhengzhou 450001,  
China.

### Table of Contents

|                                                                                      |              |
|--------------------------------------------------------------------------------------|--------------|
| <b>1. General Information</b>                                                        | <b>2</b>     |
| <b>2. General Procedure for optimization of the reaction conditions</b>              | <b>2</b>     |
| <b>3. Asymmetric reaction for the synthesis of diverse bispirocyclic saccharines</b> | <b>2-14</b>  |
| <b>4. Gram-scale reaction and derivations of adducts</b>                             | <b>14</b>    |
| <b>5. References</b>                                                                 | <b>15</b>    |
| <b>6. NMR Spectra</b>                                                                | <b>16-45</b> |
| <b>7. HPLC</b>                                                                       | <b>46-74</b> |
| <b>8. Single-crystal X-ray diffraction</b>                                           | <b>75-76</b> |

## General Information

All reactions were carried out under an atmosphere of argon using oven-dried glassware. Super dry solvents, metal catalysts, were purchased from chemical companies and used without further treatment. Flash column chromatography was performed using silica gel (300-400 mesh). <sup>1</sup>H NMR, <sup>13</sup>C NMR, <sup>19</sup>F NMR spectra were recorded in CDCl<sub>3</sub> or DMSO-d<sub>6</sub> on a 400 MHz spectrometer; chemical shifts are reported in ppm with the solvent signals as reference, and coupling constants (*J*) are given in Hertz. The peak information is described as: s = singlet, d = doublet, t = triplet, q = quartet, m = multiplet. High-resolution mass spectra (HRMS) were recorded on a commercial apparatus (ESI Source). cyclic 1-azadienes<sup>1</sup> and α-Hydroxy-1-indanone<sup>2</sup> were synthesized according to the literature.

## General Procedure for optimization of the reaction conditions.

Under a nitrogen atmosphere, a solution of diethylzinc (40 μL, 1.0 M in hexane, 0.04 mmol) was added dropwise to a solution of **L** (0.02 mmol) in solvent (2 mL). After the mixture was stirred for 30 min at room temperature, then, cyclic 1-azadienes **1a** (0.2 mmol) and α-Hydroxy-1-indanone **2a** (0.25 mmol) were added. The reaction mixture was stirred for 36 h at the same temperature. The reaction was quenched with HCl solution (1 M, 2 mL), and the organic layer was extracted with CH<sub>2</sub>Cl<sub>2</sub> (3 × 5 mL). The combined organic layer was washed with brine and dried over Na<sub>2</sub>SO<sub>4</sub>. The solvent was removed under reduced pressure by using a rotary evaporator. The residue was purified by flash chromatography with petroleum ether/ethyl acetate (4/1) to afford the desired product **3aa**.

## Asymmetric reaction for the synthesis of diverse bispirocyclic saccharines

Under a nitrogen atmosphere, a solution of diethylzinc (40 μL, 1.0 M in hexane, 0.04 mmol) was added dropwise to a solution of **L3c** (0.02 mmol) in THF (2 mL). After the mixture was stirred for 30 min at room temperature, then, cyclic 1-azadienes **1a** (0.2 mmol) and α-Hydroxy-1-indanone **2a** (0.25 mmol) were added. The reaction mixture was stirred for 36 h at 30°C temperature. The reaction was quenched with HCl solution (1 M, 2 mL), and the organic layer was extracted with CH<sub>2</sub>Cl<sub>2</sub> (3 × 5 mL). The combined organic layer was washed with brine and dried over Na<sub>2</sub>SO<sub>4</sub>. The solvent was removed under reduced pressure by using a rotary evaporator. The residue was purified by flash chromatography with petroleum ether/ethyl acetate (4/1) to afford the desired product **3**.

## Characterization of 3

(2'*R*,3*R*,3'*S*)-3'-Phenyl-3',4'-dihydro-2*H*-dispiro[benzo[*d*]isothiazole-3,5'-furan-2',2''-inden]-1''(3'*H*)-one 1,1-dioxide (**3aa**):

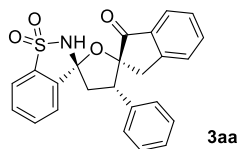

White solid in 65% isolated yield (54 mg, >20:1 dr); m.p.: 84.1-86.0 °C. [ $\alpha$ ]<sub>D</sub><sup>20</sup> = +121 (c = 1.0, CH<sub>2</sub>Cl<sub>2</sub>, 99% ee); <sup>1</sup>H NMR (400 MHz, CDCl<sub>3</sub>) δ 7.79–7.78 (m, 2H), 7.74–7.68 (m, 2H), 7.62 (t, *J* = 8.0 Hz, 1H), 7.48 (t, *J* = 7.4 Hz, 1H), 7.34 (t, *J* = 7.4 Hz, 1H), 7.17–7.15 (m, 3H), 7.05 (d, *J* = 7.7 Hz, 1H), 6.99–6.90 (m, 2H), 6.45 (s, 1H), 4.27 (dd, *J* = 13.2, 6.1 Hz, 1H), 3.14–3.02 (m, 2H), 2.96 (t, *J* = 12.8 Hz, 1H), 2.82–2.77 (m, 1H); <sup>13</sup>C NMR (101 MHz, CDCl<sub>3</sub>) δ 206.2, 151.7, 138.0, 137.5, 136.6, 135.2, 134.4, 133.7, 131.4, 128.6, 128.1, 127.8, 127.8, 126.2, 124.7, 124.2, 121.2, 96.8, 91.3, 50.2, 44.5, 36.5;

**HRMS** (ESI):  $m/z$  for  $[M+Na]^+$ : calcd 440.0927, found 440.0924; **HPLC**: Daicel Chiralpak IA, *n*-hexane/*i*-PrOH = 70/30, flow rate = 1 mL/min,  $\lambda$  = 254 nm,  $t_{major}$  = 26.32 min and  $t_{minor}$  = 42.12 min.

**3'-Phenyl-3',4'-dihydro-2H-dispiro[benzo[*d*]isothiazole-3,5'-furan-2',2''-inden]-1''(3''*H*)-one 1,1-dioxide (3aa')**:

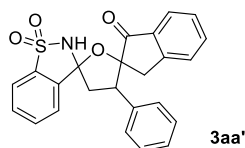

White solid in 14% isolated yield (12 mg, 2:1 dr); m.p.: 84.3-86.5 °C. **<sup>1</sup>H NMR** (400 MHz, CDCl<sub>3</sub>)  $\delta$  8.46 (d,  $J$  = 8.7 Hz, 1H), 7.81-7.64 (m, 3.72H), 7.63-7.55 (m, 1.54H), 7.49-7.40 (m, 2H), 7.37 (d,  $J$  = 7.7 Hz, 1H), 7.29 (d,  $J$  = 7.7 Hz, 1H), 7.21 (m, 1.68H), 7.18-7.11 (m, 3.80H), 7.11-7.00 (m, 4.52H), 6.92 (s, 0.55H), 5.62 (s, 1H), 4.08 (dd,  $J$  = 13.8, 5.7 Hz, 1H), 3.94 (dd,  $J$  = 13.8, 5.7 Hz, 0.56H), 3.64-3.37 (m, 4.70H), 3.05 (dd,  $J$  = 12.6, 5.6 Hz, 0.52H), 2.71 (dd,  $J$  = 12.6, 5.6 Hz, 1H); **<sup>13</sup>C NMR** (101 MHz, CDCl<sub>3</sub>)  $\delta$  207.2, 204.6, 150.7, 150.3, 141.1, 139.9, 137.2, 136.1, 135.8, 135.1, 134.8, 134.7, 134.0, 133.8, 133.3, 133.3, 130.9, 128.6, 128.4, 128.1, 127.9, 127.9, 127.8, 127.8, 126.2, 125.9, 125.8, 124.1, 123.9, 123.4, 121.1, 120.5, 97.5, 95.4, 92.4, 91.9, 56.1, 53.5, 44.2, 43.3, 39.7, 38.0; **HRMS** (ESI):  $m/z$  for  $[M+Na]^+$ : calcd 440.0927, found 440.0930.

**(2'*R*,3*R*,3'*S*)-4''-Methyl-3'-phenyl-3',4'-dihydro-2H-dispiro[benzo[*d*]isothiazole-3,5'-furan-2',2''-inden]-1''(3''*H*)-one 1,1-dioxide (3ab)**:

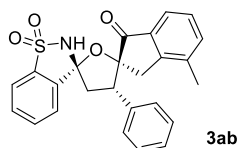

White solid in 60% isolated yield (52 mg, >20:1 dr); m.p.: 182.8-183.9 °C.  $[\alpha]_D^{20}$  = +132 ( $c$  = 1.0, CDCl<sub>3</sub>, 95% ee); **<sup>1</sup>H NMR** (400 MHz, CDCl<sub>3</sub>)  $\delta$  7.83 (d,  $J$  = 7.7 Hz, 1H), 7.75-7.69 (m, 2H), 7.68-7.63 (m, 2H), 7.32-7.27 (m, 2H), 7.17 (d,  $J$  = 6.7 Hz, 3H), 6.97-6.90 (m, 2H), 6.45 (s, 1H), 4.26 (dd,  $J$  = 13.1, 6.2 Hz, 1H), 3.02-2.80 (m, 3H), 2.85-2.80 (m, 1H), 1.96 (s, 3H); **<sup>13</sup>C NMR** (101 MHz, CDCl<sub>3</sub>)  $\delta$  206.4, 150.5, 138.0, 137.60, 136.80, 135.5, 135.3, 134.2, 133.5, 131.4, 128.4, 128.2, 127.8, 124.1, 122.1, 121.4, 96.8, 91.6, 50.7, 44.6, 35.1, 17.5; **HRMS** (ESI):  $m/z$  for  $[M+Na]^+$ : calcd 454.1084, found 454.1085; **HPLC**: Daicel Chiralpak IB, *n*-hexane/*i*-PrOH = 70/30, flow rate = 1 mL/min,  $\lambda$  = 254 nm,  $t_{major}$  = 25.83 min and  $t_{minor}$  = 19.69 min.

**(2'*R*,3*R*,3'*S*)-4''-Methoxy-3'-phenyl-3',4'-dihydro-2H-dispiro[benzo[*d*]isothiazole-3,5'-furan-2',2''-inden]-1''(3''*H*)-one 1,1-dioxide (3ac)**:

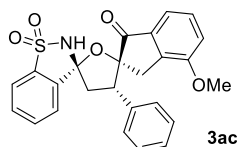

Yellow solid in 50% isolated yield (45 mg, >20:1 dr); m.p.: 160.2-162.4 °C.  $[\alpha]_D^{20}$  = +82 ( $c$  = 1.0, CH<sub>2</sub>Cl<sub>2</sub>, 91% ee); **<sup>1</sup>H NMR** (400 MHz, CDCl<sub>3</sub>)  $\delta$  7.82 (d,  $J$  = 7.7 Hz, 1H), 7.75-7.71 (m, 1H), 7.65 (m, 7.0 Hz, 2H), 7.40 (d,  $J$  = 7.5 Hz, 1H), 7.32 (t,  $J$  = 7.8 Hz, 1H), 7.20-7.16 (m, 3H), 6.95 (d,  $J$  = 8.0 Hz, 3H), 6.21 (s, 1H), 4.31 (dd,  $J$  = 13.2, 6.2 Hz, 1H), 3.71 (s, 3H), 3.10-2.90 (m, 3H), 2.86-2.81 (m, 1H); **<sup>13</sup>C NMR** (101 MHz, CDCl<sub>3</sub>)  $\delta$  205.8, 156.4, 140.6, 138.3, 137.5, 135.7, 135.3, 133.6, 131.3, 129.5, 128.6, 127.8, 127.7, 124.1, 121.3, 116.7, 116.3, 96.8, 91.1, 55.5, 50.3, 44.7, 33.1; **HRMS** (ESI):  $m/z$

for  $[M+Na]^+$ : calcd 470.1033, found 470.1039; **HPLC**: Daicel Chiralpak IB, *n*-hexane/*i*-PrOH = 70/30, flow rate = 1 mL/min,  $\lambda$  = 254 nm,  $t_{\text{major}}$  = 17.11 min and  $t_{\text{minor}}$  = 12.01 min.

**(2'*R*,3*R*,3'*S*)-4''-Chloro-3'-phenyl-3',4'-dihydro-2*H*-dispiro[benzo[*d*]isothiazole-3,5'-furan-2',2''-inden]-1''(3''*H*)-one 1,1-dioxide(3ad)**:

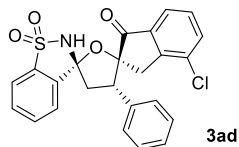

White solid in 56% isolated yield (50 mg, >20:1 dr); m.p.: 230.1-232.2 °C.  $[\alpha]_{\text{D}}^{20}$  = +64 (c = 1.0, CH<sub>2</sub>Cl<sub>2</sub>, 75% ee); **<sup>1</sup>H NMR** (400 MHz, CDCl<sub>3</sub>)  $\delta$  7.81 (d, *J* = 7.7 Hz, 1H), 7.75–7.70 (m, 3H), 7.65 (t, *J* = 7.4 Hz, 1H), 7.48 (d, *J* = 7.8 Hz, 1H), 7.33 (t, *J* = 7.7 Hz, 1H), 7.20–7.17 (m, 3H), 6.97–6.95 (m, 2H), 6.22 (s, 1H), 4.29 (dd, *J* = 13.3, 6.1 Hz, 1H), 3.15–2.94 (m, 3H), 2.83 (m, 1H); **<sup>13</sup>C NMR** (101 MHz, CDCl<sub>3</sub>)  $\delta$  205.2, 149.1, 138.0, 137.5, 136.3, 135.9, 134.7, 133.7, 132.4, 131.5, 129.6, 128.7, 128.1, 127.7, 124.2, 122.9, 121.3, 96.9, 91.1, 50.8, 44.5, 35.4; **HRMS** (ESI): *m/z* for  $[M+Na]^+$ : calcd 474.0538, found 474.0543; **HPLC**: Daicel Chiralpak IB, *n*-hexane/*i*-PrOH = 70/30, flow rate = 1 mL/min,  $\lambda$  = 254 nm,  $t_{\text{major}}$  = 27.99 min and  $t_{\text{minor}}$  = 20.81 min.

**(2'*R*,3*R*,3'*S*)-5''-Methyl-3'-phenyl-3',4'-dihydro-2*H*-dispiro[benzo[*d*]isothiazole-3,5'-furan-2',2''-inden]-1''(3''*H*)-one 1,1-dioxide(3ae)**:

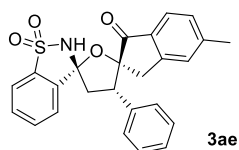

Yellow solid in 66% isolated yield (57 mg, >20:1 dr); m.p.: 169.2-170.6 °C.  $[\alpha]_{\text{D}}^{20}$  = +108 (c = 1.0, CH<sub>2</sub>Cl<sub>2</sub>, 98% ee); **<sup>1</sup>H NMR** (400 MHz, CDCl<sub>3</sub>)  $\delta$  7.83 (d, *J* = 7.7 Hz, 1H), 7.73–7.65 (m, 4H), 7.21–7.16 (m, 4H), 6.99–6.92 (m, 2H), 6.87 (s, 1H), 6.47 (s, 1H), 4.32–4.27 (m, 1H), 3.08–2.91 (m, 3H), 2.85–2.80 (m, 1H), 2.34 (s, 3H); **<sup>13</sup>C NMR** (101 MHz, CDCl<sub>3</sub>)  $\delta$  205.5, 152.2, 148.2, 137.9, 137.5, 135.6, 133.5, 132.0, 131.4, 129.4, 128.6, 127.8, 127.7, 126.5, 124.7, 124.1, 121.4, 96.7, 91.4, 50.4, 44.7, 36.4, 22.3; **HRMS** (ESI): *m/z* for  $[M+Na]^+$ : calcd 454.1084, found 454.1082; **HPLC**: Daicel Chiralpak IA, *n*-hexane/*i*-PrOH = 70/30, flow rate = 1 mL/min,  $\lambda$  = 254 nm,  $t_{\text{major}}$  = 31.67 min and  $t_{\text{minor}}$  = 49.97 min.

**(2'*R*,3*R*,3'*S*)-5''-Methoxy-3'-phenyl-3',4'-dihydro-2*H*-dispiro[benzo[*d*]isothiazole-3,5'-furan-2',2''-inden]-1''(3''*H*)-one 1,1-dioxide(3af)**:

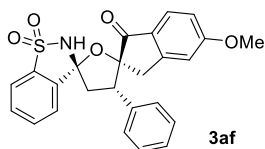

Yellow solid in 52% isolated yield (46 mg, >20:1 dr); m.p.: 153.6-154.7 °C.  $[\alpha]_{\text{D}}^{20}$  = +143 (c = 1.0, CH<sub>2</sub>Cl<sub>2</sub>, 91% ee); **<sup>1</sup>H NMR** (400 MHz, CDCl<sub>3</sub>)  $\delta$  7.80 (d, *J* = 7.7 Hz, 2H), 7.73 (d, *J* = 7.0 Hz, 1H), 7.68 (d, *J* = 6.8 Hz, 1H), 7.66–7.61 (m, 1H), 7.51 (t, *J* = 7.5 Hz, 1H), 7.39–7.33 (m, 1H), 7.12–7.06 (m, 2H), 6.71 (dd, *J* = 8.0, 2.8 Hz, 1H), 6.56 (d, *J* = 8.5 Hz, 1H), 6.45 (s, 1H), 6.38 (s, 1H), 4.25 (dd, *J* = 13.1, 6.2 Hz, 1H), 3.54 (s, 3H), 3.15–3.02 (m, 2H), 2.93 (t, *J* = 12.7 Hz, 1H), 2.80 (dd, *J* = 12.2, 6.2 Hz, 1H); **<sup>13</sup>C NMR** (101 MHz, CDCl<sub>3</sub>)  $\delta$  203.8, 166.7, 154.8, 137.8, 137.5, 135.7, 133.5, 131.4, 128.6, 127.8, 127.7, 127.4, 126.8, 124.1, 121.4, 116.1, 109.4, 96.6, 91.4, 55.7, 50.2, 44.6, 36.6; **HRMS** (ESI):

m/z for [M+Na]<sup>+</sup>: calcd 470.1033, found 470.1037; **HPLC**: Daicel Chiralpak IB, *n*-hexane/*i*-PrOH = 70/30, flow rate = 1 mL/min, λ = 254 nm, t<sub>major</sub> = 24.34 min and t<sub>minor</sub> = 19.81 min. **(2'*R*,3*R*,3'*S*)-5''-Fluoro-3'-phenyl-3',4'-dihydro-2*H*-dispiro[benzo[*d*]isothiazole-3,5'-furan-2',2''-inden]-1''(3''*H*)-one 1,1-dioxide (3ag)**:

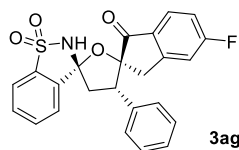

Yellow solid in 69% isolated yield (60 mg, >20:1 dr); m.p.: 130.6-131.8 °C. [α]<sub>D</sub><sup>20</sup> = +107 (c = 1.0, CH<sub>2</sub>Cl<sub>2</sub>, 96% ee); **<sup>1</sup>H NMR** (400 MHz, CDCl<sub>3</sub>) δ 7.87–7.81 (m, 2H), 7.74 (t, *J* = 7.1 Hz, 1H), 7.67 (d, *J* = 7.5 Hz, 2H), 7.22–7.20 (m, 3H), 7.11–7.04 (m, 1H), 7.00–6.93 (m, 2H), 6.74 (d, *J* = 8.1 Hz, 1H), 6.35 (s, 1H), 4.29 (dd, *J* = 13.1, 6.2 Hz, 1H), 3.14–3.02 (m, 2H), 2.95 (t, *J* = 12.7 Hz, 1H), 2.85–2.81 (m, 1H); **<sup>19</sup>F NMR** (376 MHz, CDCl<sub>3</sub>) δ -98.77; **<sup>13</sup>C NMR** (101 MHz, CDCl<sub>3</sub>) δ 204.2, 168.1 (d, *J* = 259.5 Hz), 154.6 (d, *J* = 10.6 Hz), 137.8, 137.5, 135.1, 133.6, 131.4, 130.8 (d, *J* = 2.1 Hz), 128.7, 128.0, 127.7, 127.4, 127.3, 124.1, 121.4, 116.6 (d, *J* = 23.8 Hz), 113.0 (d, *J* = 22.4 Hz), 96.8, 91.3, 50.6, 44.5, 36.5; **HRMS** (ESI): m/z for [M+Na]<sup>+</sup>: calcd 458.0833, found 458.0838; **HPLC**: Daicel Chiralpak IB, *n*-hexane/*i*-PrOH = 70/30, flow rate = 1 mL/min, λ = 254 nm, t<sub>major</sub> = 20.06 min and t<sub>minor</sub> = 15.93 min. **(2'*R*,3*R*,3'*S*)-5''-Chloro-3'-phenyl-3',4'-dihydro-2*H*-dispiro[benzo[*d*]isothiazole-3,5'-furan-2',2''-inden]-1''(3''*H*)-one 1,1-dioxide (3ah)**:

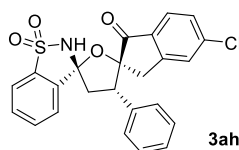

Yellow solid in 54% isolated yield (49 mg, 17:1 dr); m.p.: 189.1-189.9 °C. [α]<sub>D</sub><sup>20</sup> = +76 (c = 1.0, CH<sub>2</sub>Cl<sub>2</sub>, 97% ee); **<sup>1</sup>H NMR** (400 MHz, CDCl<sub>3</sub>) δ 7.84 (d, *J* = 8.3 Hz, 1H), 7.79 (d, *J* = 1.8 Hz, 1H), 7.73 (d, *J* = 7.5 Hz, 1H), 7.69–7.64 (m, 2H), 7.46 (m, 1H), 7.23–7.18 (m, 3H), 7.01 (d, *J* = 8.2 Hz, 1H), 6.95 (m, 2H), 6.23 (s, 1H), 4.28 (dd, *J* = 13.1, 6.3 Hz, 1H), 3.11–2.99 (m, 2H), 2.94 (t, *J* = 12.7 Hz, 1H), 2.86–2.81 (m, 1H); **<sup>13</sup>C NMR** (101 MHz, CDCl<sub>3</sub>) δ 205.0, 149.6, 137.9, 137.6, 136.4, 135.8, 134.9, 134.5, 133.6, 131.4, 128.7, 128.0, 127.7, 127.4, 124.4, 124.0, 121.4, 96.8, 91.6, 50.8, 44.5, 36.1; **HRMS** (ESI): m/z for [M+Na]<sup>+</sup>: calcd 474.0538, found 474.0541; **HPLC**: Daicel Chiralpak IA, *n*-hexane/*i*-PrOH = 70/30, flow rate = 1 mL/min, λ = 254 nm, t<sub>major</sub> = 20.97 min and t<sub>minor</sub> = 48.71 min. **(2'*R*,3*R*,3'*S*)-5''-Bromo-3'-phenyl-3',4'-dihydro-2*H*-dispiro[benzo[*d*]isothiazole-3,5'-furan-2',2''-inden]-1''(3''*H*)-one 1,1-dioxide (3ai)**:

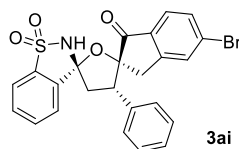

Yellow solid in 70% isolated yield (69 mg, >20:1 dr); m.p.: 147.5-148.9 °C. [α]<sub>D</sub><sup>20</sup> = +83 (c = 1.0, CH<sub>2</sub>Cl<sub>2</sub>, 85% ee); **<sup>1</sup>H NMR** (400 MHz, CDCl<sub>3</sub>) δ 7.88–7.80 (m, 2H), 7.73 (d, *J* = 7.6 Hz, 1H), 7.66 (t, *J* = 8.0 Hz, 2H), 7.21 (dd, *J* = 5.0, 2.0 Hz, 3H), 7.07 (td, *J* = 8.7, 2.3 Hz, 1H), 6.96 (dd, *J* = 6.5, 3.2 Hz, 2H), 6.74 (dd, *J* = 8.3, 2.2 Hz, 1H), 6.37 (s, 1H), 4.29 (dd, *J* = 13.1, 6.2 Hz, 1H), 3.12–3.02 (m, 2H), 2.95 (t, *J* = 12.7 Hz, 1H), 2.85–2.81 (m, 1H); **<sup>13</sup>C NMR** (101 MHz, CDCl<sub>3</sub>) δ 205.0, 153.0, 137.8, 137.5, 135.0, 133.6, 133.1, 132.1, 131.9, 131.5, 129.4, 128.8, 128.0, 127.7, 125.9, 124.0, 121.4, 96.8, 91.0, 50.6, 44.5, 36.2; **HRMS** (ESI): m/z for [M+Na]<sup>+</sup>: calcd 518.0033, found 518.0037; **HPLC**: Daicel

Chiralpak IA, *n*-hexane/*i*-PrOH = 70/30, flow rate = 1 mL/min,  $\lambda$  = 254 nm,  $t_{\text{major}}$  = 32.25 min and  $t_{\text{minor}}$  = 55.14 min.

**(2'*R*,3*R*,3'*S*)-6''-Methyl-3'-phenyl-3',4'-dihydro-2*H*-dispiro[benzo[*d*]isothiazole-3,5'-furan-2',2''-inden]-1''(3''*H*)-one 1,1-dioxide (3aj):**

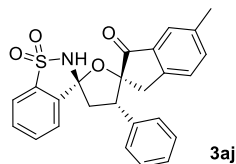

Yellow solid in 60% isolated yield (52 mg, >20:1 dr); m.p.: 129.3-130.2 °C.  $[\alpha]_{\text{D}}^{20}$  = +54 ( $c$  = 1.0, CH<sub>2</sub>Cl<sub>2</sub>, 99% ee); **<sup>1</sup>H NMR** (400 MHz, CDCl<sub>3</sub>)  $\delta$  7.83 (d,  $J$  = 7.7 Hz, 1H), 7.72 (d,  $J$  = 7.9 Hz, 1H), 7.69–7.64 (m, 2H), 7.61 (s, 1H), 7.32 (d,  $J$  = 8.8 Hz, 1H), 7.18 (dd,  $J$  = 5.0, 1.7 Hz, 3H), 6.95 (d,  $J$  = 6.9 Hz, 3H), 6.42 (s, 1H), 4.28 (dd,  $J$  = 13.1, 6.3 Hz, 1H), 3.08–2.91 (m, 3H), 2.82 (dd,  $J$  = 12.2, 6.3 Hz, 1H), 2.38 (s, 3H); **<sup>13</sup>C NMR** (101 MHz, CDCl<sub>3</sub>)  $\delta$  206.2, 149.0, 138.2, 138.0, 137.8, 137.6, 135.4, 134.5, 133.5, 131.4, 128.56, 127.8, 127.7, 125.8, 124.6, 124.1, 121.4, 96.7, 91.6, 50.6, 44.6, 36.1, 21.1; **HRMS** (ESI):  $m/z$  for [M+Na]<sup>+</sup>: calcd 454.1084, found 454.1088; **HPLC**: Daicel Chiralpak IA, *n*-hexane/*i*-PrOH = 70/30, flow rate = 1 mL/min,  $\lambda$  = 254 nm,  $t_{\text{major}}$  = 23.07 min and  $t_{\text{minor}}$  = 36.45 min.

**(2'*R*,3*R*,3'*S*)-6''-Methoxy-3'-phenyl-3',4'-dihydro-2*H*-dispiro[benzo[*d*]isothiazole-3,5'-furan-2',2''-inden]-1''(3''*H*)-one 1,1-dioxide (3ak):**

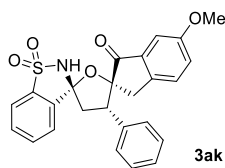

Yellow solid in 70% isolated yield (63 mg, >20:1 dr); m.p.: 181.3-181.8 °C.  $[\alpha]_{\text{D}}^{20}$  = +64 ( $c$  = 1.0, CH<sub>2</sub>Cl<sub>2</sub>, 90% ee); **<sup>1</sup>H NMR** (400 MHz, CDCl<sub>3</sub>)  $\delta$  7.83 (d,  $J$  = 7.7 Hz, 1H), 7.73 (d,  $J$  = 7.9 Hz, 1H), 7.69–7.63 (m, 2H), 7.24 (d,  $J$  = 2.4 Hz, 1H), 7.21–7.17 (m, 3H), 7.10 (dd,  $J$  = 8.4, 2.6 Hz, 1H), 6.98–6.93 (m, 3H), 6.39 (s, 1H), 4.28 (dd,  $J$  = 13.1, 6.2 Hz, 1H), 3.84 (s, 3H), 3.05–2.91 (m, 3H), 2.83 (dd,  $J$  = 12.2, 6.2 Hz, 1H); **<sup>13</sup>C NMR** (101 MHz, CDCl<sub>3</sub>)  $\delta$  206.1, 159.7, 144.6, 138.0, 137.6, 135.4, 135.3, 133.5, 131.4, 128.6, 127.8, 127.7, 126.9, 126.0, 124.1, 121.4, 105.6, 96.8, 91.9, 55.7, 50.7, 44.6, 35.8; **HRMS** (ESI):  $m/z$  for [M+Na]<sup>+</sup>: calcd 470.1033, found 470.103; **HPLC**: Daicel Chiralpak IB, *n*-hexane/*i*-PrOH = 70/30, flow rate = 1 mL/min,  $\lambda$  = 254 nm,  $t_{\text{major}}$  = 40.59 min and  $t_{\text{minor}}$  = 28.64 min.

**(2'*R*,3*R*,3'*S*)-6''-Bromo-3'-phenyl-3',4'-dihydro-2*H*-dispiro[benzo[*d*]isothiazole-3,5'-furan-2',2''-inden]-1''(3''*H*)-one 1,1-dioxide (3al):**

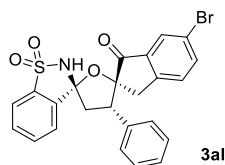

Yellow solid in 63% isolated yield (62 mg, 17:1 dr); m.p.: 192.3-193.4 °C.  $[\alpha]_{\text{D}}^{20}$  = +91 ( $c$  = 1.0, CH<sub>2</sub>Cl<sub>2</sub>, 83% ee); **<sup>1</sup>H NMR** (400 MHz, CDCl<sub>3</sub>)  $\delta$  7.94 (s, 1H), 7.84 (d,  $J$  = 7.6 Hz, 1H), 7.73 (d,  $J$  = 7.6 Hz, 1H), 7.67 (t,  $J$  = 6.6 Hz, 2H), 7.60 (dd,  $J$  = 8.1, 1.8 Hz, 1H), 7.23–7.18 (m, 3H), 6.96 (dd,  $J$  = 5.1, 3.0 Hz, 3H), 6.22 (s, 1H), 4.31–4.24 (m, 1H), 3.09–2.90 (m, 3H), 2.83 (dd,  $J$  = 12.3, 6.3 Hz, 1H); **<sup>13</sup>C NMR** (101 MHz, CDCl<sub>3</sub>)  $\delta$  204.9, 150.0, 139.2, 137.9, 137.6, 136.1, 134.9, 133.6, 131.4, 128.7, 128.0,

127.7, 127.7, 127.5, 124.0, 122.3, 121.4, 96.8, 91.4, 50.8, 44.5, 36.2; **HRMS** (ESI):  $m/z$  for  $[M+Na]^+$ : calcd 518.0033, found 518.0032; **HPLC**: Daicel Chiralpak IB, *n*-hexane/*i*-PrOH = 70/30, flow rate = 1 mL/min,  $\lambda$  = 254 nm,  $t_{\text{major}}$  = 22.35 min and  $t_{\text{minor}}$  = 17.24 min.

**(2'*R*,3*R*,3'*S*)-3'-(4-fluorophenyl)-3',4'-dihydro-2*H*-dispiro[benzo[*d*]isothiazole-3,5'-furan-2',2''-inden]-1''(3''*H*)-one 1,1-dioxide (3ba):**

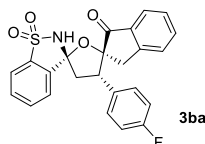

Yellow solid in 62% isolated yield (54 mg, >20:1 dr); m.p.: 177.8-179.0 °C.  $[\alpha]_{\text{D}}^{20}$  = +109 ( $c$  = 1.0,  $\text{CH}_2\text{Cl}_2$ , 96% ee);  **$^1\text{H NMR}$**  (400 MHz,  $\text{CDCl}_3$ )  $\delta$  7.86–7.80 (m, 2H), 7.77–7.72 (m, 1H), 7.69–7.64 (m, 2H), 7.53 (td,  $J$  = 7.5, 1.3 Hz, 1H), 7.41–7.36 (m, 1H), 7.09 (d,  $J$  = 8.6 Hz, 1H), 6.95–6.84 (m, 4H), 6.32 (s, 1H), 4.27 (dd,  $J$  = 12.7, 6.7 Hz, 1H), 3.10–3.04 (m, 2H), 2.93–2.78 (m, 2H);  **$^{19}\text{F NMR}$**  (376 MHz,  $\text{CDCl}_3$ )  $\delta$  -113.95;  **$^{13}\text{C NMR}$**  (101 MHz,  $\text{CDCl}_3$ )  $\delta$  205.8, 162.1 (d,  $J$  = 247.2 Hz), 151.3, 137.8 (d,  $J$  = 31.1 Hz), 136.6, 134.4, 133.5, 131.4, 131.0 (d,  $J$  = 3.3 Hz), 129.4, 129.3, 128.2, 126.2, 124.8, 124.0, 121.4, 115.6, 115.4, 96.7, 91.2, 45.0, 44.9, 36.4; **HRMS** (ESI):  $m/z$  for  $[M+Na]^+$ : calcd 458.0833, found 458.0841; **HPLC**: Daicel Chiralpak IB, *n*-hexane/*i*-PrOH = 70/30, flow rate = 1 mL/min,  $\lambda$  = 254 nm,  $t_{\text{major}}$  = 25.58 min and  $t_{\text{minor}}$  = 15.44 min.

**(2'*R*,3*R*,3'*S*)-3'-(4-chlorophenyl)-3',4'-dihydro-2*H*-dispiro[benzo[*d*]isothiazole-3,5'-furan-2',2''-inden]-1''(3''*H*)-one 1,1-dioxide (3ca):**

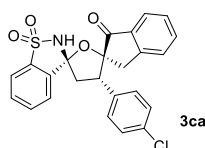

Yellow solid in 68% isolated yield (61 mg, >20:1 dr); m.p.: 237.7-238.8 °C.  $[\alpha]_{\text{D}}^{20}$  = +128 ( $c$  = 1.0,  $\text{CH}_2\text{Cl}_2$ , 97% ee);  **$^1\text{H NMR}$**  (400 MHz,  $\text{CDCl}_3$ )  $\delta$  7.83 (dd,  $J$  = 8.0, 4.0 Hz, 2H), 7.76–7.72 (m, 1H), 7.70–7.63 (m, 2H), 7.55 (t,  $J$  = 7.4 Hz, 1H), 7.39 (t,  $J$  = 7.5 Hz, 1H), 7.22–7.14 (m, 2H), 7.11 (d,  $J$  = 7.7 Hz, 1H), 6.89 (d,  $J$  = 8.0 Hz, 2H), 6.34 (s, 1H), 4.27 (dd,  $J$  = 12.6, 6.6 Hz, 1H), 3.13–3.03 (m, 2H), 2.94–2.75 (m, 2H);  **$^{13}\text{C NMR}$**  (101 MHz,  $\text{CDCl}_3$ )  $\delta$  205.7, 151.3, 137.9, 137.7, 136.7, 134.3, 133.8, 133.7, 133.5, 131.4, 129.0, 128.8, 128.3, 126.2, 124.8, 124.0, 121.4, 96.7, 91.0, 50.0, 44.7, 36.4; **HRMS** (ESI):  $m/z$  for  $[M+Na]^+$ : calcd 474.0538, found 474.0537; **HPLC**: Daicel Chiralpak IB, *n*-hexane/*i*-PrOH = 70/30, flow rate = 1 mL/min,  $\lambda$  = 254 nm,  $t_{\text{major}}$  = 20.91 min and  $t_{\text{minor}}$  = 12.79 min.

**(2'*R*,3*R*,3'*S*)-3'-(4-bromophenyl)-3',4'-dihydro-2*H*-dispiro[benzo[*d*]isothiazole-3,5'-furan-2',2''-inden]-1''(3''*H*)-one 1,1-dioxide (3da):**

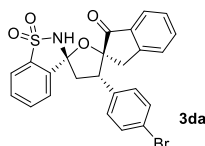

Yellow solid in 69% isolated yield (68 mg, 17:1 dr); m.p.: 198.6-199.7 °C.  $[\alpha]_{\text{D}}^{20}$  = +108 ( $c$  = 1.0,  $\text{CH}_2\text{Cl}_2$ , 93% ee);  **$^1\text{H NMR}$**  (400 MHz,  $\text{CDCl}_3$ )  $\delta$  7.87–7.80 (m, 2H), 7.76–7.71 (m, 1H), 7.67 (t,  $J$  = 6.3 Hz, 2H), 7.55 (td,  $J$  = 7.5, 1.3 Hz, 1H), 7.40 (t,  $J$  = 7.3 Hz, 1H), 7.31 (d,  $J$  = 8.4 Hz, 2H), 7.12 (d,  $J$  = 7.7 Hz, 1H), 6.83 (d,  $J$  = 8.4 Hz, 2H), 6.31 (s, 1H), 4.26 (dd,  $J$  = 12.6, 6.7 Hz, 1H), 3.12–3.03 (m, 2H), 2.92–2.78 (m, 2H);  **$^{13}\text{C NMR}$**  (101 MHz,  $\text{CDCl}_3$ )  $\delta$  205.7, 151.3, 137.9, 137., 136.8, 134.4, 134.3, 133.5, 131.7, 131.4, 129.4, 128.3, 126.3, 124.9, 124.0, 121.8, 121.4, 96.7, 90.9, 50.0, 44.7, 36.4;

**HRMS** (ESI):  $m/z$  for  $[M+Na]^+$ : calcd 518.0033, found 518.0029; **HPLC**: Daicel Chiralpak IB, *n*-hexane/*i*-PrOH = 70/30, flow rate = 1 mL/min,  $\lambda$  = 254 nm,  $t_{\text{major}}$  = 50.11 min and  $t_{\text{minor}}$  = 31.01 min.

**(2'R,3R,3'S)-3'-(*p*-tolyl)-3',4'-dihydro-2H-dispiro[benzo[*d*]isothiazole-3,5'-furan-2',2''-inden]-1''(3''H)-one 1,1-dioxide (3ea):**

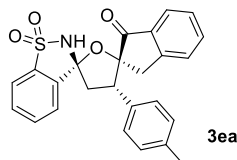

Yellow solid in 60% isolated yield (52 mg, >20:1 dr); m.p.: 115.3-117.1 °C.  $[\alpha]_D^{20}$  = +88 ( $c$  = 1.0,  $\text{CDCl}_3$ , 91% ee); **<sup>1</sup>H NMR** (400 MHz,  $\text{CDCl}_3$ )  $\delta$  7.82 (dd,  $J$  = 7.6, 4.1 Hz, 2H), 7.73 (d,  $J$  = 6.9 Hz, 1H), 7.66 (d,  $J$  = 7.6 Hz, 2H), 7.51 (d,  $J$  = 6.6 Hz, 1H), 7.37 (t,  $J$  = 7.5 Hz, 1H), 7.09 (d,  $J$  = 7.7 Hz, 1H), 6.98 (d,  $J$  = 7.9 Hz, 2H), 6.84 (d,  $J$  = 8.0 Hz, 2H), 6.40 (s, 1H), 4.26 (dd,  $J$  = 13.1, 6.3 Hz, 1H), 3.15–3.03 (m, 2H), 2.93 (t,  $J$  = 12.7 Hz, 1H), 2.81 (dd,  $J$  = 12.2, 6.3 Hz, 1H), 2.25 (s, 3H); **<sup>13</sup>C NMR** (101 MHz,  $\text{CDCl}_3$ )  $\delta$  206.3, 151.7, 138.0, 137.5, 137.5, 136.5, 134.4, 133.5, 132.2, 131.4, 129.3, 128.1, 127.6, 126.2, 124.8, 124.1, 121.37, 96.7, 91.2, 50.2, 44.8, 36.5, 21.0; **HRMS** (ESI):  $m/z$  for  $[M+Na]^+$ : calcd 454.1084, found 454.1070; **HPLC**: Daicel Chiralpak IB, *n*-hexane/*i*-PrOH = 70/30, flow rate = 1 mL/min,  $\lambda$  = 254 nm,  $t_{\text{major}}$  = 14.84 min and  $t_{\text{minor}}$  = 10.16 min.

**(2'R,3R,3'S)-3'-(4-Methoxyphenyl)-3',4'-dihydro-2H-dispiro[benzo[*d*]isothiazole-3,5'-furan-2',2''-inden]-1''(3''H)-one 1,1-dioxide (3fa):**

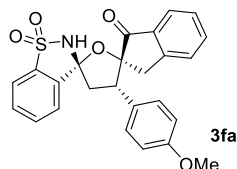

Yellow solid in 55% isolated yield (49 mg, >20:1 dr); m.p.: 158.8-160.2 °C.  $[\alpha]_D^{20}$  = 139 ( $c$  = 1.0,  $\text{CH}_2\text{Cl}_2$ , 88% ee); **<sup>1</sup>H NMR** (400 MHz,  $\text{CDCl}_3$ )  $\delta$  7.82 (t,  $J$  = 7.1 Hz, 2H), 7.73 (s, 1H), 7.66 (dd,  $J$  = 7.6, 2.9 Hz, 2H), 7.51 (t,  $J$  = 7.5 Hz, 1H), 7.37 (t,  $J$  = 7.5 Hz, 1H), 7.09 (d,  $J$  = 7.7 Hz, 1H), 6.87 (d,  $J$  = 8.6 Hz, 2H), 6.70 (d,  $J$  = 8.7 Hz, 2H), 6.40 (s, 1H), 4.24 (dd,  $J$  = 13.0, 6.3 Hz, 1H), 3.73 (s, 3H), 3.15–3.07 (m, 2H), 2.89 (t,  $J$  = 12.6 Hz, 1H), 2.80 (dd,  $J$  = 12.2, 6.4 Hz, 1H); **<sup>13</sup>C NMR** (101 MHz,  $\text{CDCl}_3$ )  $\delta$  206.3, 159.0, 151.6, 138.1, 137.6, 136.5, 134.4, 133.5, 131.3, 128.8, 128.1, 127.2, 126.2, 124.7, 124.1, 121.4, 113.9, 96.7, 91.4, 55.2, 50.0, 44.9, 36.4; **HRMS** (ESI):  $m/z$  for  $[M+Na]^+$ : calcd 470.1033, found 470.1037; **HPLC**: Daicel Chiralpak IB, *n*-hexane/*i*-PrOH = 70/30, flow rate = 1 mL/min,  $\lambda$  = 254 nm,  $t_{\text{major}}$  = 30.85 min and  $t_{\text{minor}}$  = 15.29 min.

**(2'R,3R,3'S)-3'-(*m*-tolyl)-3',4'-dihydro-2H-dispiro[benzo[*d*]isothiazole-3,5'-furan-2',2''-inden]-1''(3''H)-one 1,1-dioxide (3ga):**

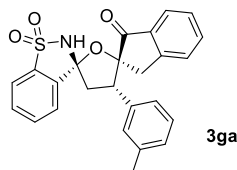



Yellow solid in 47% isolated yield (40 mg, >20:1 dr); m.p.: 178.7-180.2 °C.  $[\alpha]_{\text{D}}^{20} = +76$  (c = 1.0, CH<sub>2</sub>Cl<sub>2</sub>, 90% ee); **<sup>1</sup>H NMR** (400 MHz, CDCl<sub>3</sub>) δ 7.82 (d, *J* = 7.7 Hz, 2H), 7.73 (d, *J* = 7.9 Hz, 1H), 7.71–7.63 (m, 2H), 7.51 (t, *J* = 7.5 Hz, 1H), 7.36 (t, *J* = 7.4 Hz, 1H), 7.07 (t, *J* = 8.2 Hz, 2H), 6.98 (d, *J* = 7.5 Hz, 1H), 6.76 (d, *J* = 7.6 Hz, 1H), 6.70 (s, 1H), 6.40 (s, 1H), 4.25 (dd, *J* = 13.1, 6.2 Hz, 1H), 3.12–3.02 (m, 2H), 2.94 (t, *J* = 12.7 Hz, 1H), 2.81 (dd, *J* = 12.2, 6.2 Hz, 1H), 2.16 (s, 3H); **<sup>13</sup>C NMR** (101 MHz, CDCl<sub>3</sub>) δ 206.3, 151.8, 138.3, 138.0, 137.5, 136.5, 135.2, 134.4, 133.5, 131.4, 128.7, 128.5, 128.4, 128.0, 126.2, 124.7, 124.7, 124.2, 121.4, 96.8, 91.4, 50.5, 44.5, 36.5, 21.3; **HRMS**. (ESI): *m/z* for [M+Na]<sup>+</sup>: calcd 454.1084, found 454.1085; **HPLC**: Daicel Chiralpak IB, *n*-hexane/*i*-PrOH = 70/30, flow rate = 1 mL/min, λ = 254 nm, *t*<sub>major</sub> = 25.25 min and *t*<sub>minor</sub> = 17.55 min

**(2'*R*,3*R*,3'*S*)-3'-(2-Methoxyphenyl)-3',4'-dihydro-2*H*-dispiro[benzo[*d*]isothiazole-3,5'-furan-2',2''-inden]-1''(3''*H*)-one 1,1-dioxide (3ha):**

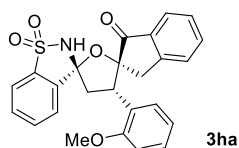

Yellow solid in 48% isolated yield (43 mg, >20:1 dr); m.p.: 170.2-171.5 °C.  $[\alpha]_{\text{D}}^{20} = +131$  (c = 1.0, CH<sub>2</sub>Cl<sub>2</sub>, 93% ee); **<sup>1</sup>H NMR** (400 MHz, CDCl<sub>3</sub>) δ 7.77 (dd, *J* = 10.7, 7.6 Hz, 2H), 7.67–7.63 (m, 1H), 7.61–7.55 (m, 2H), 7.45–7.40 (m, 1H), 7.32–7.27 (m, 1H), 7.16 (t, *J* = 7.8 Hz, 2H), 7.05 (d, *J* = 7.6 Hz, 1H), 6.91 (t, *J* = 6.9 Hz, 1H), 6.64 (s, 1H), 6.51 (d, *J* = 8.0 Hz, 1H), 4.39 (dd, *J* = 13.6, 6.1 Hz, 1H), 3.01 (s, 3H), 2.95–2.83 (m, 3H), 2.69 (dd, *J* = 11.8, 6.2 Hz, 1H); **<sup>13</sup>C NMR** (101 MHz, CDCl<sub>3</sub>) δ 205.6, 156.9, 151.3, 137.6, 137.5, 135.6, 134.5, 133.4, 131.3, 128.8, 127.6, 126.8, 126.1, 125.3, 124.6, 124.1, 121.4, 120.6, 109.7, 96.4, 90.6, 53.7, 44.6, 43.7, 36.8; **HRMS** (ESI): *m/z* for [M+Na]<sup>+</sup>: calcd 470.1033, found 470.1038; **HPLC**: Daicel Chiralpak IB, *n*-hexane/*i*-PrOH = 70/30, flow rate = 1 mL/min, λ = 254 nm, *t*<sub>major</sub> = 27.43 min and *t*<sub>minor</sub> = 23.21 min.

**(2'*R*,3*R*,3'*S*)-3'-(3,4-Dimethylphenyl)-3',4'-dihydro-2*H*-dispiro[benzo[*d*]isothiazole-3,5'-furan-2',2''-inden]-1''(3''*H*)-one 1,1-dioxide (3ia):**

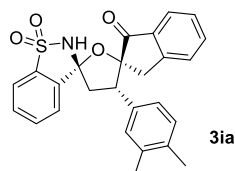

Yellow solid in 50% isolated yield (44 mg, >20:1 dr); m.p.: 172.5-173.8 °C.  $[\alpha]_{\text{D}}^{20} = +113$  (c = 1.0, CH<sub>2</sub>Cl<sub>2</sub>, 90% ee); **<sup>1</sup>H NMR** (400 MHz, CDCl<sub>3</sub>) δ 7.80 (d, *J* = 7.7 Hz, 2H), 7.70 (t, *J* = 6.5 Hz, 2H), 7.66–7.61 (m, 1H), 7.53–7.48 (m, 1H), 7.35 (t, *J* = 7.4 Hz, 1H), 7.09 (d, *J* = 7.7 Hz, 1H), 6.93 (d, *J* = 7.7 Hz, 1H), 6.68 (d, *J* = 7.8 Hz, 1H), 6.65 (s, 1H), 6.46 (s, 1H), 4.22 (dd, *J* = 13.2, 6.2 Hz, 1H), 3.08 (q, *J* = 17.1 Hz, 2H), 2.93 (t, *J* = 12.7 Hz, 1H), 2.78 (dd, *J* = 12.2, 6.2 Hz, 1H), 2.15 (s, 3H), 2.06 (s, 3H); **<sup>13</sup>C NMR** (101 MHz, CDCl<sub>3</sub>) δ 206.5, 151.9, 138.0, 137.4, 136.8, 136.4, 136.1, 134.4, 133.6, 132.6, 131.3, 129.7, 129.1, 128.0, 126.3, 125.0, 124.7, 124.2, 121.3, 96.7, 91.3, 50.1, 44.6, 36.5, 19.7, 19.4; **HRMS** (ESI): *m/z* for [M+Na]<sup>+</sup>: calcd 468.1240, found 468.1243; **HPLC**: Daicel Chiralpak IB, *n*-hexane/*i*-PrOH = 70/30, flow rate = 1 mL/min, λ = 254 nm, *t*<sub>major</sub> = 28.54 min and *t*<sub>minor</sub> = 17.48 min.

**(2'*R*,3*R*,3'*S*)-3'-(3-Bromo-4-chlorophenyl)-3',4'-dihydro-2*H*-dispiro[benzo[*d*]isothiazole-3,5'-furan-2',2''-inden]-1''(3''*H*)-one 1,1-dioxide (3ja):**

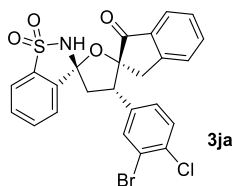

Yellow solid in 60% isolated yield (64 mg, 11:1 dr); m.p.: 169.4–170.5 °C.  $[\alpha]_D^{20} = +153$  (c = 1.0, CH<sub>2</sub>Cl<sub>2</sub>, 90% ee); **<sup>1</sup>H NMR** (400 MHz, CDCl<sub>3</sub>) δ 7.85–7.82 (m, 2H), 7.73 (d, *J* = 7.9 Hz, 1H), 7.70–7.65 (m, 2H), 7.57 (t, *J* = 8.2 Hz, 1H), 7.40 (t, *J* = 7.4 Hz, 1H), 7.21 (d, *J* = 8.1 Hz, 2H), 7.14 (d, *J* = 7.7 Hz, 1H), 6.78 (dd, *J* = 8.3, 2.2 Hz, 1H), 6.35 (s, 1H), 4.22 (dd, *J* = 12.3, 6.9 Hz, 1H), 3.15–3.02 (m, 2H), 2.91–2.77 (m, 2H); **<sup>13</sup>C NMR** (101 MHz, CDCl<sub>3</sub>) δ 205.4, 151.1, 137.8, 137.6, 136.9, 135.7, 134.2, 134.0, 133.6, 132.8, 131.5, 130.3, 128.5, 127.9, 126.3, 124.9, 124.1, 122.8, 121.4, 96.7, 90.9, 49.6, 44.5, 36.4; **HRMS** (ESI): *m/z* for [M+Na]<sup>+</sup>: calcd 551.9643, found 551.9648; **HPLC**: Daicel Chiralpak IB, *n*-hexane/*i*-PrOH = 70/30, flow rate = 1 mL/min, λ = 254 nm, *t*<sub>major</sub> = 57.68 min and *t*<sub>minor</sub> = 28.21 min.

**(2'*R*,3*R*,3'*S*)-3'-(3,4-Dichlorophenyl)-3',4'-dihydro-2*H*-dispiro[benzo[*d*]isothiazole-3,5'-furan-2',2''-inden]-1''(3''*H*)-one 1,1-dioxide (3ka):**

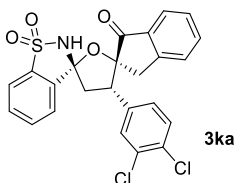

Yellow solid in 65% isolated yield (63 mg, >20:1 dr); m.p.: 188.4–189.3 °C.  $[\alpha]_D^{20} = +102$  (c = 1.0, CH<sub>2</sub>Cl<sub>2</sub>, 86% ee); **<sup>1</sup>H NMR** (400 MHz, CDCl<sub>3</sub>) δ 7.86–7.81 (m, 1H), 7.76–7.71 (m, 1H), 7.70–7.63 (m, 3H), 7.52 (d, *J* = 6.6 Hz, 1H), 7.22 (dd, *J* = 5.0, 1.9 Hz, 3H), 6.96 (dd, *J* = 6.4, 3.1 Hz, 2H), 6.29 (s, 1H), 4.29 (dd, *J* = 13.2, 6.3 Hz, 1H), 3.12–3.01 (m, 2H), 2.94 (t, *J* = 12.7 Hz, 1H), 2.83 (dd, *J* = 12.2, 6.3 Hz, 1H); **<sup>13</sup>C NMR** (101 MHz, CDCl<sub>3</sub>) δ 205.4, 151.1, 137.8, 137.6, 136.9, 135.6, 134.2, 133.6, 132.9, 132.0, 131.5, 130.5, 129.5, 128.4, 127.3, 126.3, 124.9, 124.1, 121.4, 96.6, 90.8, 49.7, 44.6, 36.4; **HRMS** (ESI): *m/z* for [M+Na]<sup>+</sup>: calcd 508.0148, found 508.0152; **HPLC**: Daicel Chiralpak IB, *n*-hexane/*i*-PrOH = 70/30, flow rate = 1 mL/min, λ = 254 nm, *t*<sub>major</sub> = 56.74 min and *t*<sub>minor</sub> = 26.59 min.

**(2'*R*,3*R*,3'*S*)-3'-(4-Bromo-2-fluorophenyl)-3',4'-dihydro-2*H*-dispiro[benzo[*d*]isothiazole-3,5'-furan-2',2''-inden]-1''(3''*H*)-one 1,1-dioxide (3la):**

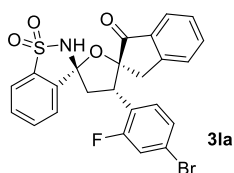

Yellow solid in 80% isolated yield (82 mg, >20:1 dr); m.p.: 218.4–219.3 °C.  $[\alpha]_D^{20} = +176$  (c = 1.0, CH<sub>2</sub>Cl<sub>2</sub>, 94% ee); **<sup>1</sup>H NMR** (400 MHz, CDCl<sub>3</sub>) δ 7.80 (t, *J* = 7.1 Hz, 2H), 7.75–7.62 (m, 3H), 7.54 (t, *J* = 7.5 Hz, 1H), 7.37 (t, *J* = 7.5 Hz, 1H), 7.26 (d, *J* = 8.0 Hz, 1H), 7.19–7.09 (m, 2H), 7.02 (d, *J* = 11.5 Hz, 1H), 6.54 (s, 1H), 4.39 (dd, *J* = 13.3, 6.3 Hz, 1H), 3.17–2.94 (m, 3H), 2.78 (dd, *J* = 12.2, 6.3 Hz, 1H); **<sup>19</sup>F NMR** (376 MHz, CDCl<sub>3</sub>) δ -108.99; **<sup>13</sup>C NMR** (101 MHz, CDCl<sub>3</sub>) δ 205.2, 160.8 (d, *J* = 251.8 Hz), 150.7, 137.5, 136.5, 133.9, 133.6, 131.5, 130.0 (d, *J* = 4.7 Hz), 128.3, 127.8 (d, *J* = 3.6 Hz), 126.1, 125.0, 124.2, 122.5 (d, *J* = 14.8 Hz), 122.1 (d, *J* = 9.7 Hz), 121.3, 119.4 (d, *J* = 25.5 Hz), 96.6, 90.5, 44.5, 44.1, 36.6; **HRMS** (ESI): *m/z* for [M+Na]<sup>+</sup>: calcd 535.9938, found 535.9942; **HPLC**: Daicel

Chiralpak IB, *n*-hexane/*i*-PrOH = 70/30, flow rate = 1 mL/min,  $\lambda$  = 254 nm,  $t_{\text{major}}$  = 21.04 min and  $t_{\text{minor}}$  = 13.07 min.

**(2'*R*,3*R*,3'*S*)-3'-(Benzo[*d*][1,3]dioxol-4-yl)-3',4'-dihydro-2*H*-dispiro[benzo[*d*]isothiazole-3,5'-furan-2',2''-inden]-1''(3''*H*)-one 1,1-dioxide (3ma):**

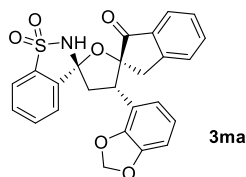

Yellow solid in 51% isolated yield (47 mg, >20:1 dr); m.p.: 190.5-191.6 °C.  $[\alpha]_{\text{D}}^{20}$  = +88 ( $c$  = 1.0, CH<sub>2</sub>Cl<sub>2</sub>, 91% ee); **<sup>1</sup>H NMR** (400 MHz, CDCl<sub>3</sub>)  $\delta$  7.85–7.78 (m, 2H), 7.72 (d,  $J$  = 6.6 Hz, 1H), 7.66 (d,  $J$  = 7.5 Hz, 2H), 7.54 (t,  $J$  = 7.4 Hz, 1H), 7.37 (t,  $J$  = 7.5 Hz, 1H), 7.15 (d,  $J$  = 8.1 Hz, 1H), 6.60 (d,  $J$  = 8.0 Hz, 1H), 6.47 (d,  $J$  = 1.4 Hz, 1H), 6.43–6.39 (m, 1H), 6.37 (s, 1H), 5.89 (dd,  $J$  = 12.8, 1.2 Hz, 2H), 4.22 (dd,  $J$  = 12.7, 6.6 Hz, 1H), 3.21–3.04 (m, 2H), 2.91–2.75 (m, 2H); **<sup>13</sup>C NMR**(101 MHz, CDCl<sub>3</sub>)  $\delta$  206.1, 151.7, 147.9, 147.1, 138.0, 137.5, 136.6, 134.3, 133.5, 131.4, 129.0, 128.2, 126.2, 124.8, 124.1, 121.4, 121.3, 108.3, 108.0, 101.2, 96.6, 91.1, 50.2, 45.0, 36.4; **HRMS** (ESI):  $m/z$  for [M+Na]<sup>+</sup>: calcd 484.0826, found 484.0832; **HPLC**: Daicel Chiralpak IB, *n*-hexane/*i*-PrOH = 70/30, flow rate = 1 mL/min,  $\lambda$  = 254 nm,  $t_{\text{major}}$  = 41.72 min and  $t_{\text{minor}}$  = 21.64 min.

**(2'*R*,3*R*,3'*S*)-3'-(Naphthalen-2-yl)-3',4'-dihydro-2*H*-dispiro[benzo[*d*]isothiazole-3,5'-furan-2',2''-inden]-1''(3''*H*)-one 1,1-dioxide (3na):**

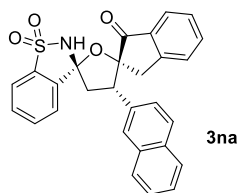

Yellow solid in 48% isolated yield (45 mg, >20:1 dr); m.p.: 224.7-226.1 °C.  $[\alpha]_{\text{D}}^{20}$  = +97 ( $c$  = 1.0, CH<sub>2</sub>Cl<sub>2</sub>, 90% ee); **<sup>1</sup>H NMR** (400 MHz, CDCl<sub>3</sub>)  $\delta$  7.82–7.75 (m, 2H), 7.72–7.56 (m, 6H), 7.53 (d,  $J$  = 8.5 Hz, 1H), 7.45 (s, 1H), 7.38 (t,  $J$  = 4.8 Hz, 3H), 7.30 (t,  $J$  = 7.7 Hz, 1H), 6.92 (d,  $J$  = 7.6 Hz, 1H), 6.86 (m, 1H), 6.35 (s, 1H), 4.41 (dd,  $J$  = 13.1, 6.1 Hz, 1H), 3.09–2.97 (m, 3H), 2.87 (dd,  $J$  = 12.2, 6.2 Hz, 1H); **<sup>13</sup>C NMR**(101 MHz, CDCl<sub>3</sub>)  $\delta$  206.1, 151.7, 138.0, 137.6, 136.6, 134.3, 133.5, 133.1, 133.1, 132.7, 131.4, 128.3, 128.1, 127.7, 127.6, 126.6, 126.4, 126.3, 126.2, 125.8, 124.9, 124.4, 121.4, 96.8, 91.2, 50.6, 44.8, 36.6; **HRMS** (ESI):  $m/z$  for [M+Na]<sup>+</sup>: calcd 490.1084, found 490.1080; **HPLC**: Daicel Chiralpak IA, *n*-hexane/*i*-PrOH = 70/30, flow rate = 1 mL/min,  $\lambda$  = 254 nm,  $t_{\text{major}}$  = 20.40 min and  $t_{\text{minor}}$  = 35.97 min.

**(2'*R*,3*R*,3'*S*)-3'-(Furan-2-yl)-3',4'-dihydro-2*H*-dispiro[benzo[*d*]isothiazole-3,5'-furan-2',2''-inden]-1''(3''*H*)-one 1,1-dioxide (3oa):**

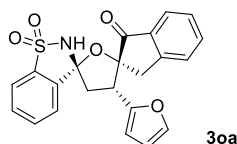

Yellow solid in 57% isolated yield (46 mg, 10:1 dr); m.p.: 122.5-124.3 °C.  $[\alpha]_{\text{D}}^{20}$  = +65 ( $c$  = 1.0, CH<sub>2</sub>Cl<sub>2</sub>, 93% ee); **<sup>1</sup>H NMR** (400 MHz, CDCl<sub>3</sub>)  $\delta$  7.82 (d,  $J$  = 7.7 Hz, 2H), 7.73 (d,  $J$  = 6.7 Hz, 1H), 7.69–7.63 (m, 2H), 7.59–7.54 (m, 1H), 7.40 (t,  $J$  = 7.4 Hz, 1H), 7.17 (d,  $J$  = 7.7 Hz, 1H), 7.12 (dd,  $J$  = 5.1, 1.2 Hz, 1H), 6.84 (dd,  $J$  = 5.1, 3.5 Hz, 1H), 6.58 (d,  $J$  = 3.6 Hz, 1H), 6.42 (s, 1H), 4.50–4.42 (m,

1H), 3.28–3.08 (m, 2H), 2.97 (dd,  $J = 12.2, 6.3$  Hz, 1H), 2.86 (t,  $J = 12.6$  Hz, 1H);  $^{13}\text{C}$  NMR (101 MHz,  $\text{CDCl}_3$ )  $\delta$  205.8, 152.0, 138.5, 137.7, 137.5, 136.7, 134.1, 133.6, 131.4, 128.2, 127.1, 126.2, 126.1, 124.9, 124.8, 124.2, 121.3, 96.6, 91.3, 46.7, 46.3, 36.6; **HRMS** (ESI):  $m/z$  for  $[\text{M}+\text{Na}]^+$ : calcd 430.0720, found 430.0735; **HPLC**: Daicel Chiralpak IB, *n*-hexane/*i*-PrOH = 70/30, flow rate = 1 mL/min,  $\lambda = 254$  nm,  $t_{\text{major}} = 15.95$  min and  $t_{\text{minor}} = 14.13$  min.

**(2'*R*,3*R*,3'*R*)-3'-(Thiophen-2-yl)-3',4'-dihydro-2*H*-dispiro[benzo[*d*]isothiazole-3,5'-furan-2',2''-inden]-1''(3''*H*)-one 1,1-dioxide (3pa):**

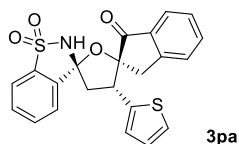

Brown solid in 63% isolated yield (53 mg, 10:1 dr); m.p.: 92.4–92.9 °C.  $[\alpha]_{\text{D}}^{20} = +90$  ( $c = 1.0$ ,  $\text{CH}_2\text{Cl}_2$ , 93% ee);  $^1\text{H}$  NMR (400 MHz,  $\text{CDCl}_3$ )  $\delta$  7.82 (d,  $J = 7.5$  Hz, 2H), 7.74 (d,  $J = 9.1$  Hz, 1H), 7.70–7.64 (m, 2H), 7.57 (t,  $J = 6.8$  Hz, 1H), 7.42 (s, 1H), 7.21 (d,  $J = 8.2$  Hz, 1H), 7.14 (d,  $J = 7.7$  Hz, 1H), 7.08 (d,  $J = 2.2$  Hz, 1H), 6.73 (dd,  $J = 8.3, 2.2$  Hz, 1H), 6.38 (s, 1H), 4.23 (dd,  $J = 12.5, 6.8$  Hz, 1H), 3.09 (q,  $J = 17.2$  Hz, 2H), 2.94–2.76 (m, 2H);  $^{13}\text{C}$  NMR (101 MHz,  $\text{CDCl}_3$ )  $\delta$  205.7, 152.0, 138.6, 137.7, 137.6, 136.7, 134.2, 133.6, 131.4, 128.2, 127.1, 126.2, 126.1, 124.9, 124.7, 124.1, 121.4, 96.6, 91.3, 46.7, 46.3, 36.6; **HRMS** (ESI):  $m/z$  for  $[\text{M}+\text{Na}]^+$ : calcd 446.0492, found 446.0995; **HPLC**: Daicel Chiralpak IB, *n*-hexane/*i*-PrOH = 70/30, flow rate = 1 mL/min,  $\lambda = 254$  nm,  $t_{\text{major}} = 14.95$  min and  $t_{\text{minor}} = 13.13$  min.

## Gram-scale reaction and derivations of adducts

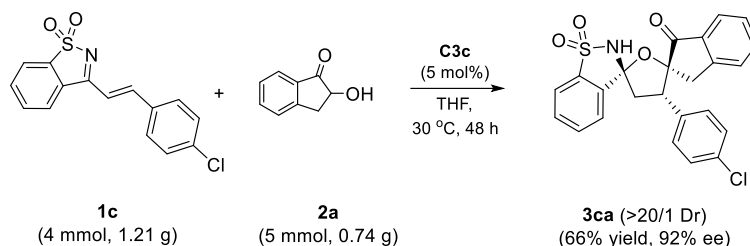

Under a nitrogen atmosphere, a solution of diethylzinc (400  $\mu\text{L}$ , 1.0 M in hexane, 0.8 mmol) was added dropwise to a solution of **L3c** (0.2 mmol) in THF (10 mL). After the mixture was stirred for 30 min at room temperature, then, cyclic 1-azadienes **1c** (4.0 mmol) and  $\alpha$ -hydroxy-1-indanone **2a** (5.0 mmol) were added. The reaction mixture was stirred for 36 h at the 36 $^\circ\text{C}$ . The reaction was quenched with HCl solution (1 M, 2 mL), and the organic layer was extracted with  $\text{CH}_2\text{Cl}_2$  (3  $\times$  5 mL). The combined organic layer was washed with brine and dried over  $\text{Na}_2\text{SO}_4$ . The solvent was removed under reduced pressure by using a rotary evaporator. The residue was purified by flash chromatography with petroleum ether/ethyl acetate (4/1) to afford the desired product 1.19g of **3ca**.

## Transformation of **3ca** to **4**

Sodium borohydride (15 mg, 0.4 mmol, 4 equiv.) was added to a solution of **3ca** (45 mg, 0.1 mmol) in methanol (3 mL) at 0  $^\circ\text{C}$ . Then, the resulting reaction mixture was stirred at room temperature for 30 minutes. Saturated aqueous  $\text{NH}_4\text{Cl}$  (3 mL) was then added to quench the reaction. The organic layer was extracted with DCM (3  $\times$  5 mL), then washed with brine, dried over  $\text{MgSO}_4$  and concentrated under reduced pressure. The crude reaction mixture was purified via column chromatography (petroleum ether/ethyl acetate =1/1) on silica gel to afford pure product **4** as a white solid in 91% yield.

## (2'*R*,3*R*,3'*S*)-3'-(4-Chlorophenyl)-1''-hydroxy-1'',3'',4'-tetrahydro-2*H*-dispiro[benzo[*d*]isothiazole-3,5'-furan-2',2''-indene] 1,1-dioxide (**4**)

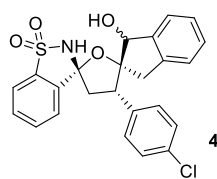

Yellow solid in 91% isolated yield (41 mg, >20:1 dr); m.p.: 145.7-147.1  $^\circ\text{C}$ .  $[\alpha]_{\text{D}}^{20} = +149$  ( $c = 1.0$ ,  $\text{CH}_2\text{Cl}_2$ , 91% ee);  $^1\text{H NMR}$  (400 MHz,  $\text{CDCl}_3$ )  $\delta$  7.59 (d,  $J = 7.8$  Hz, 1H), 7.42–7.38 (m, 1H), 7.27 (t,  $J = 7.7$  Hz, 1H), 7.22–7.20 (m, 1H), 7.07 (t,  $J = 8.2$  Hz, 1H), 7.02 (d,  $J = 5.9$  Hz, 1H), 6.96 (d,  $J = 8.0$  Hz, 2H), 6.88 (s, 1H), 6.72 (d,  $J = 7.8$  Hz, 1H), 6.11 (d,  $J = 2.5$  Hz, 1H), 4.92–4.90 (m, 1H), 4.83 (s, 1H), 3.07–3.04 (m, 1H), 2.87 (d,  $J = 17.2$  Hz, 1H), 2.69–2.63 (m, 1H), 2.52–2.44 (m, 2H), 1.97 (d,  $J = 17.2$  Hz, 1H), 1.74 (s, 1H);  $^{13}\text{C NMR}$  (101 MHz,  $\text{CDCl}_3$ )  $\delta$  141.8, 141.4, 140.8, 138.5, 135.4, 132.3, 132.2, 130.3, 129.7, 129.0, 128.2, 127.7, 126.3, 125.9, 124.7, 120.9, 85.3, 81.2, 57.5, 44.8, 43.2, 36.1; **HRMS** (ESI):  $m/z$  for  $[\text{M}+\text{Na}]^+$ : calcd 476.0694, found 476.0683; **HPLC**: Daicel Chiralpak IB,  $n$ -hexane/ $i$ -PrOH = 70/30, flow rate = 1 mL/min,  $\lambda = 254$  nm,  $t_{\text{major}} = 6.74$  min and  $t_{\text{minor}} = 8.28$  min.

## Transformation of 3ca to 5

To a stirred solution of **3ca** (45 mg, 0.1 mmol, 1.0 equiv) and triethylamine (40  $\mu$ L, 0.3 mmol, 3.0 equiv) in  $\text{CH}_2\text{Cl}_2$  (3 mL), DMAP (1.2 mg, 0.01 mmol, 0.1 equiv), Acetic anhydride (11  $\mu$ L, 0.12 mmol, 1.2 equiv) was added at 0 ° C. The reaction mixture was stirred at this temperature for 30 min and further stirred at room temperature for 6 h. Saturated aqueous  $\text{NH}_4\text{Cl}$  (3 mL) was then added to quench the reaction and extracted with  $\text{CH}_2\text{Cl}_2$  (3 x 10 mL). Drying ( $\text{Na}_2\text{SO}_4$ ) and concentrated under reduced pressure. The crude reaction mixture was purified via column chromatography (petroleum ether/ethyl acetate =6/1) on silica gel to afford pure product **5** as a white solid in 81% yield.

**(2'R,3R,3'S)-2-Acetyl-3'-(4-chlorophenyl)-3',4'-dihydro-2H-dispiro[benzo[d]isothiazole-3,5'-furan-2',2''-inden]-1''(3''H)-one 1,1-dioxide (5)**

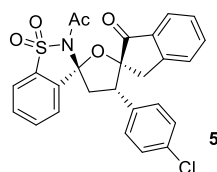

Yellow solid in 81% isolated yield (40 mg, >20:1 dr); m.p.: 144.5-146.1 °C.  $[\alpha]_{\text{D}}^{20} = +131$  (c = 1.0,  $\text{CH}_2\text{Cl}_2$ , 92% ee);  $^1\text{H NMR}$  (400 MHz,  $\text{CDCl}_3$ )  $\delta$  8.63 (d,  $J = 8.0$  Hz, 1H), 7.95 (t,  $J = 8.0$  Hz, 1H), 7.82 (d,  $J = 7.0$  Hz, 1H), 7.71 (t,  $J = 8.1$  Hz, 2H), 7.49 (t,  $J = 8.1$  Hz, 1H), 7.34–7.28 (m, 1H), 7.16 (d,  $J = 8.5$  Hz, 3H), 7.09 (d,  $J = 8.6$  Hz, 2H), 4.54 (dd,  $J = 13.2, 8.7$  Hz, 1H), 3.97 (t,  $J = 13.3$  Hz, 1H), 3.37 (m, 2H), 2.81–2.67 (m, 4H);  $^{13}\text{C NMR}$  (101 MHz,  $\text{CDCl}_3$ )  $\delta$  205.1, 168.0, 152.9, 139.2, 136.4, 135.5, 134.2, 134.0, 133.6, 131.2, 131.0, 129.6, 128.7, 127.7, 126.4, 125.7, 124.2, 120.6, 98.8, 92.0, 50.9, 40.9, 37.6, 24.9; **HRMS** (ESI): m/z for  $[\text{M}+\text{Na}]^+$ : calcd 516.0643, found 516.0645; **HPLC**: Daicel Chiralpak IB, *n*-hexane/*i*-PrOH = 70/30, flow rate = 1 mL/min,  $\lambda = 254$  nm,  $t_{\text{major}} = 7.52$  min and  $t_{\text{minor}} = 25.80$  min

## References

1. R. A. Abramovitch, I. Shinkai, B. J. Mavunkel, K. M. More, S. O'Conner, G. H. Ooi, W. T. Pennington, P. C. Srinivasan and J. R. Stowers, *Tetrahedron*, 1996, **52**, 3339.
2. K. Matsuo and M. Shindo, *Org. Lett.*, 2010, **12**, 5346.

# NMR Spectra of compounds

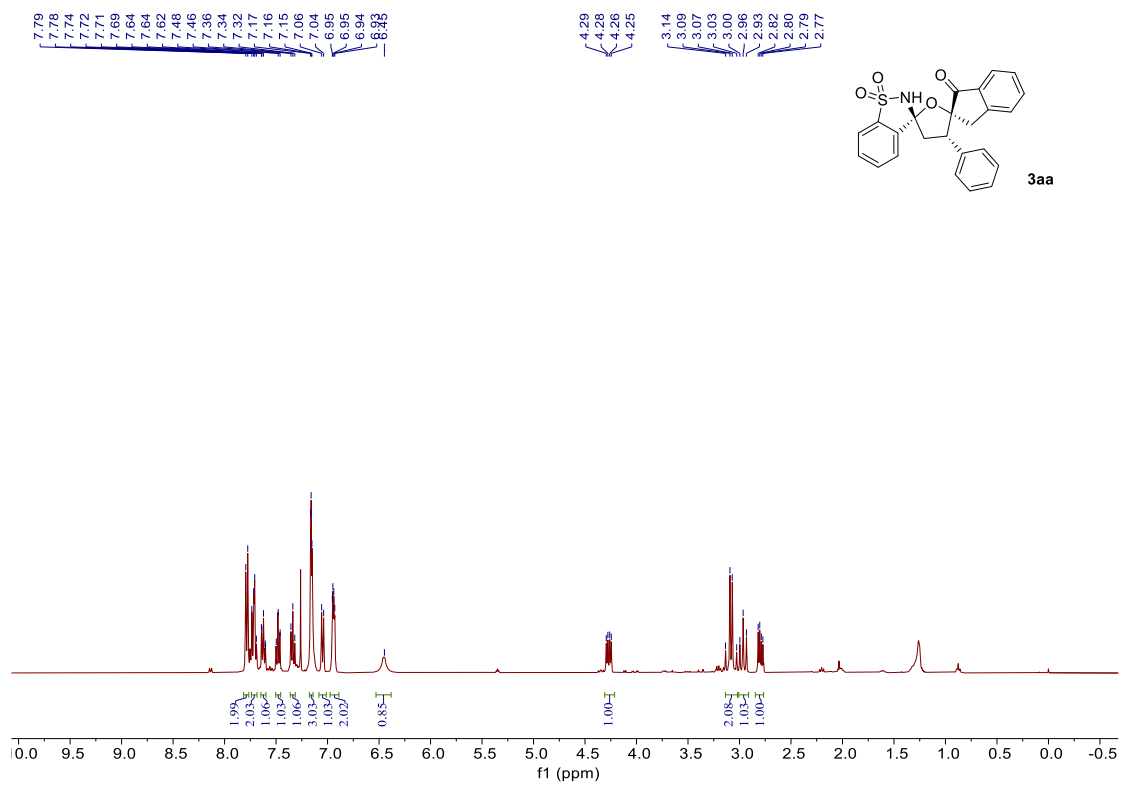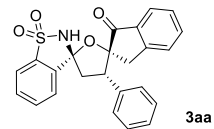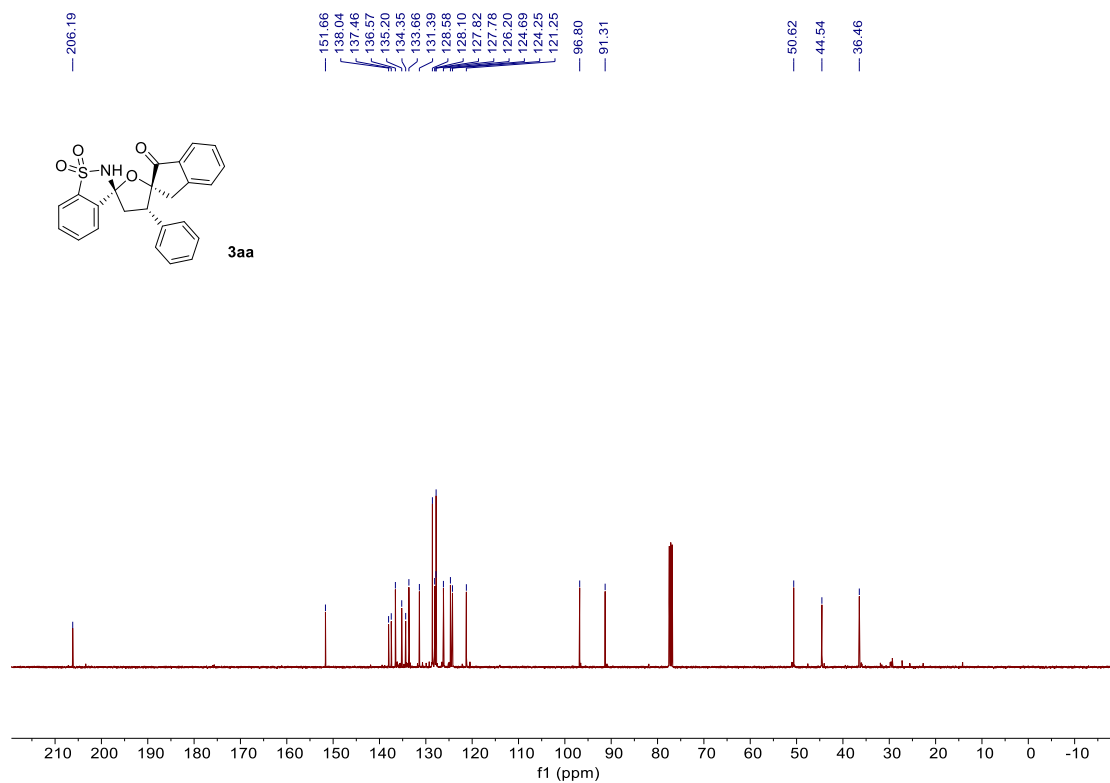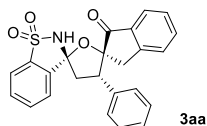



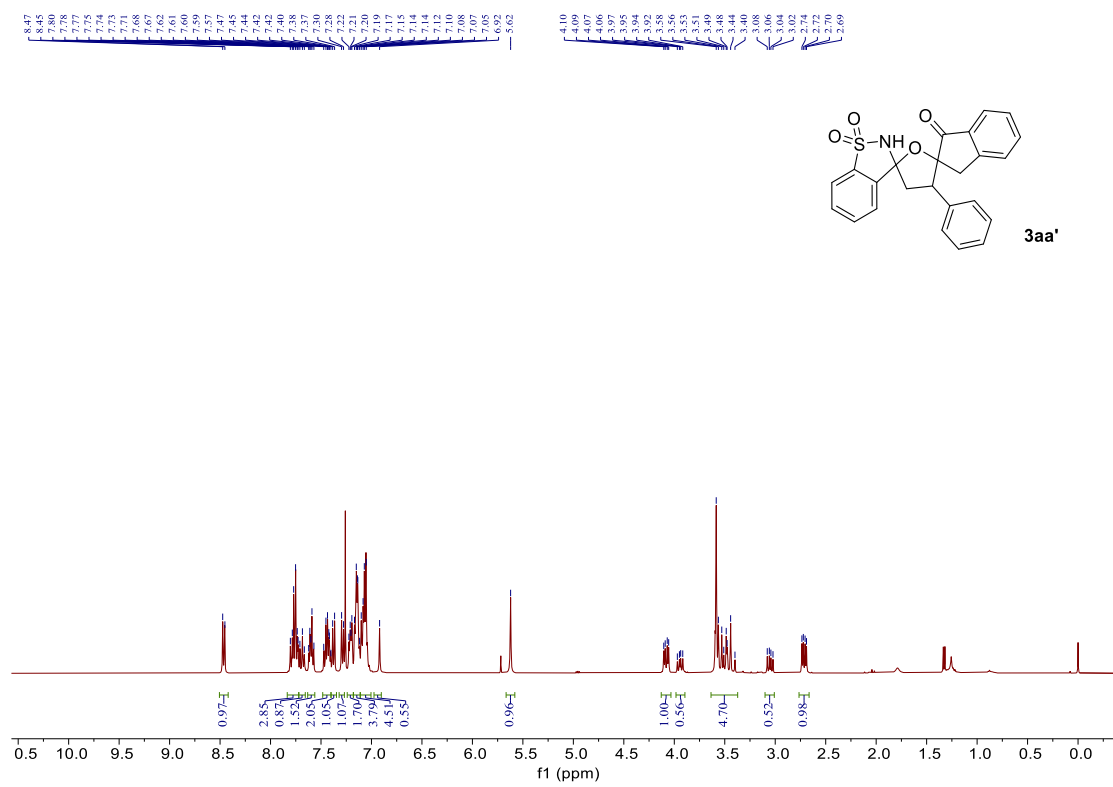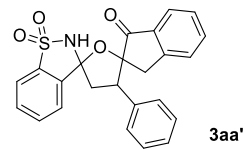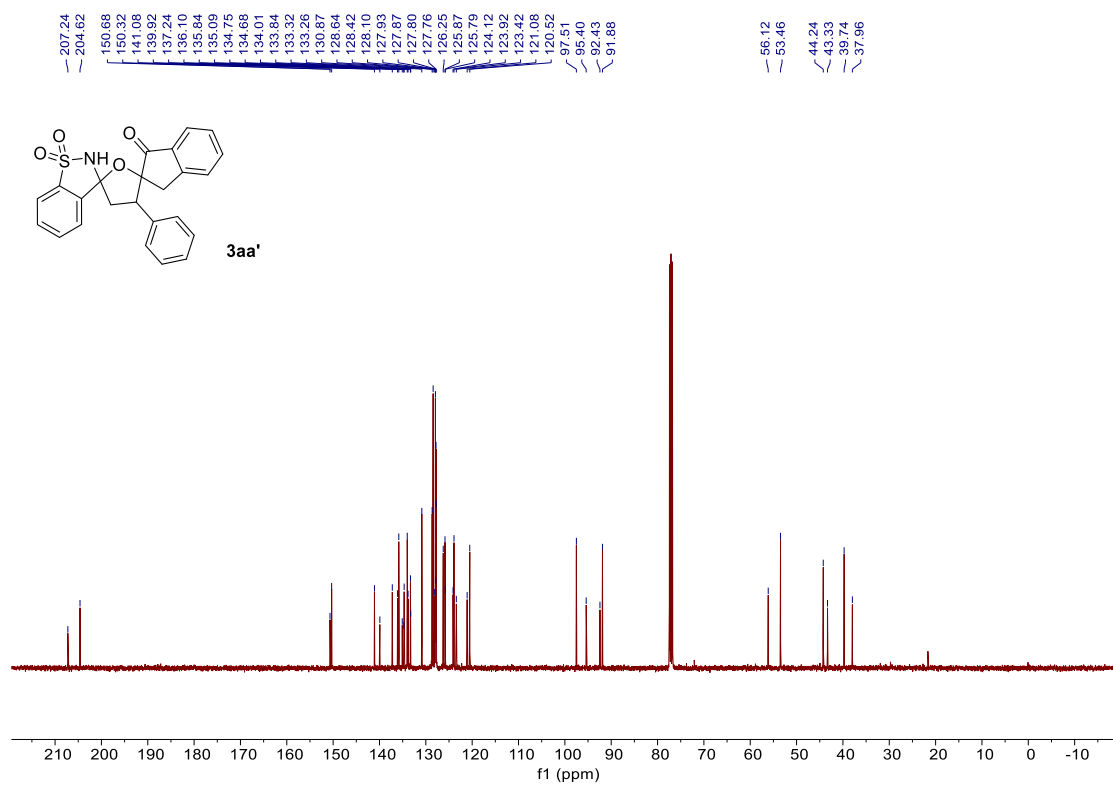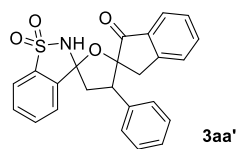

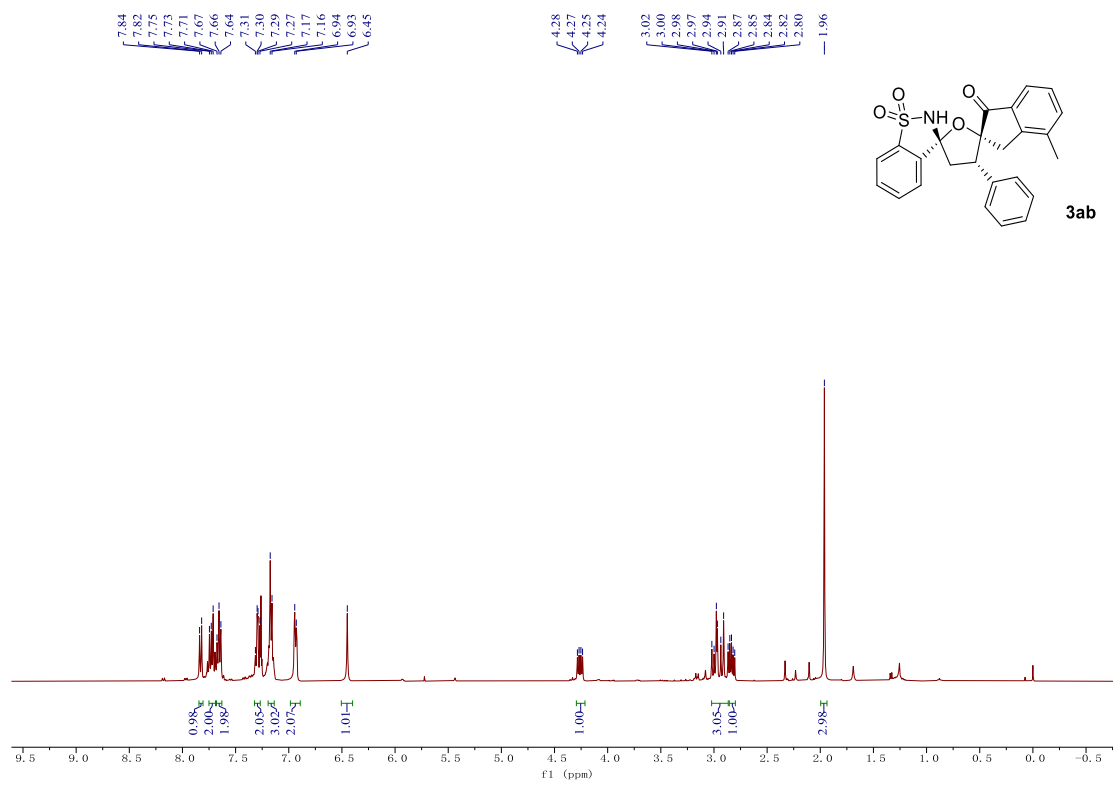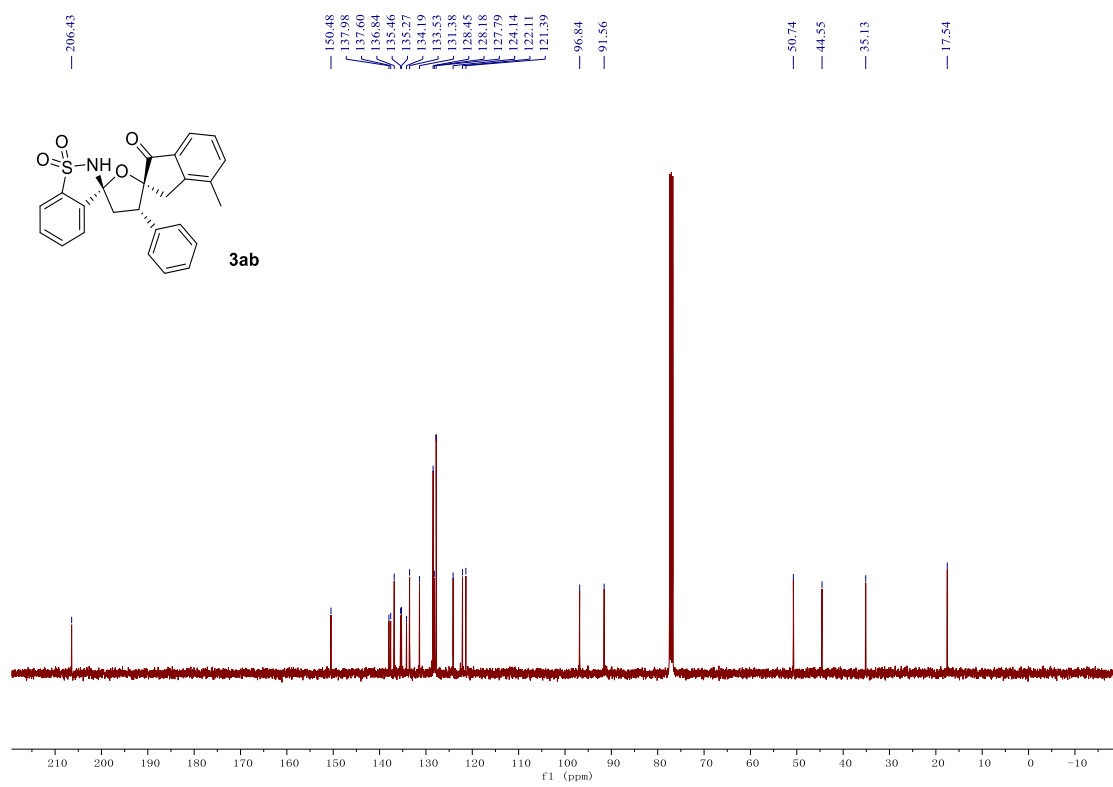

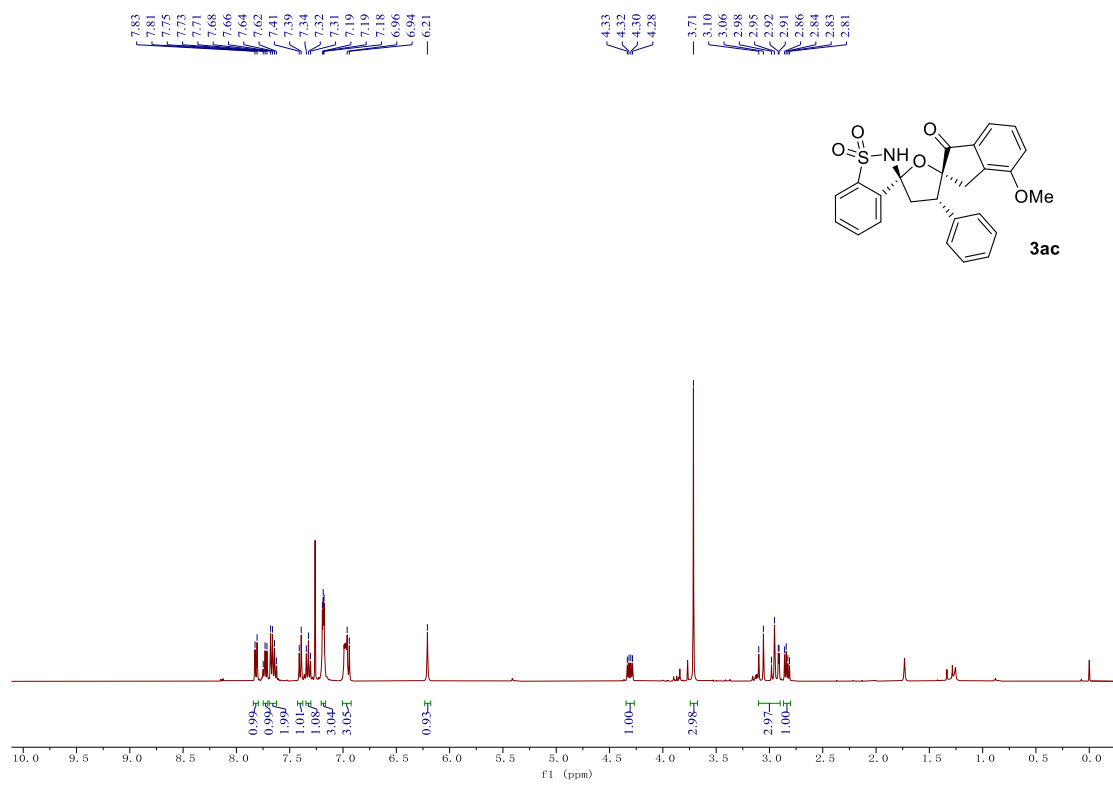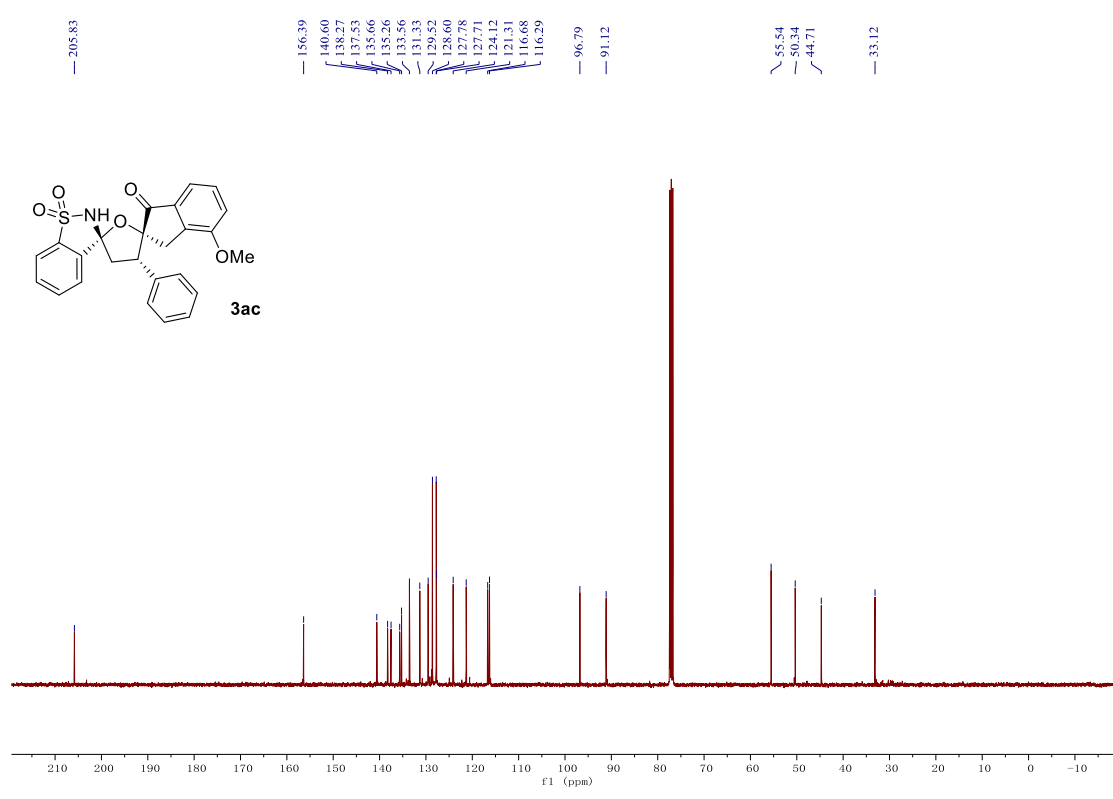

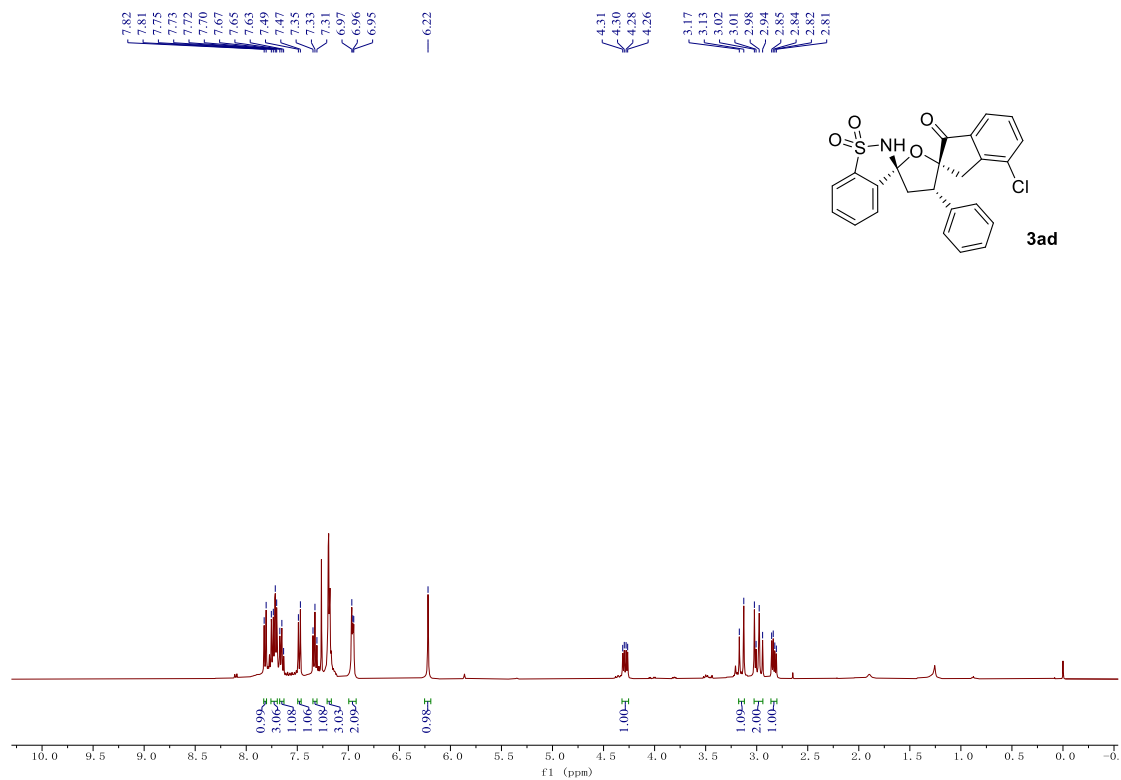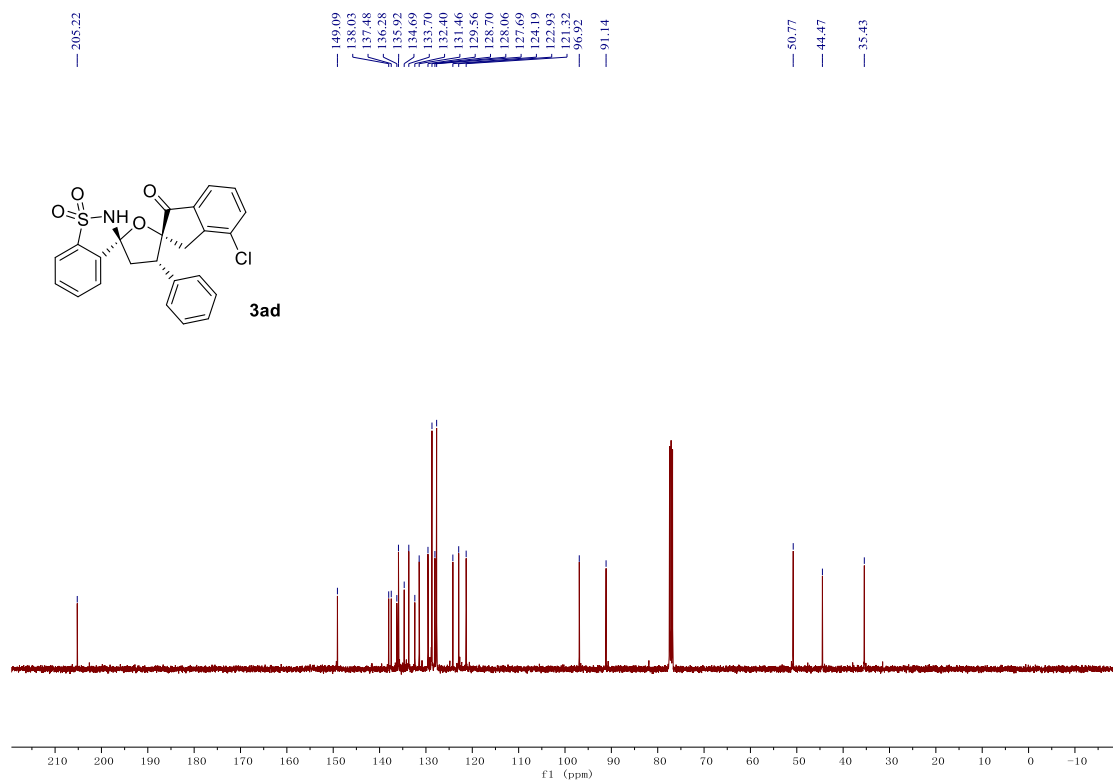

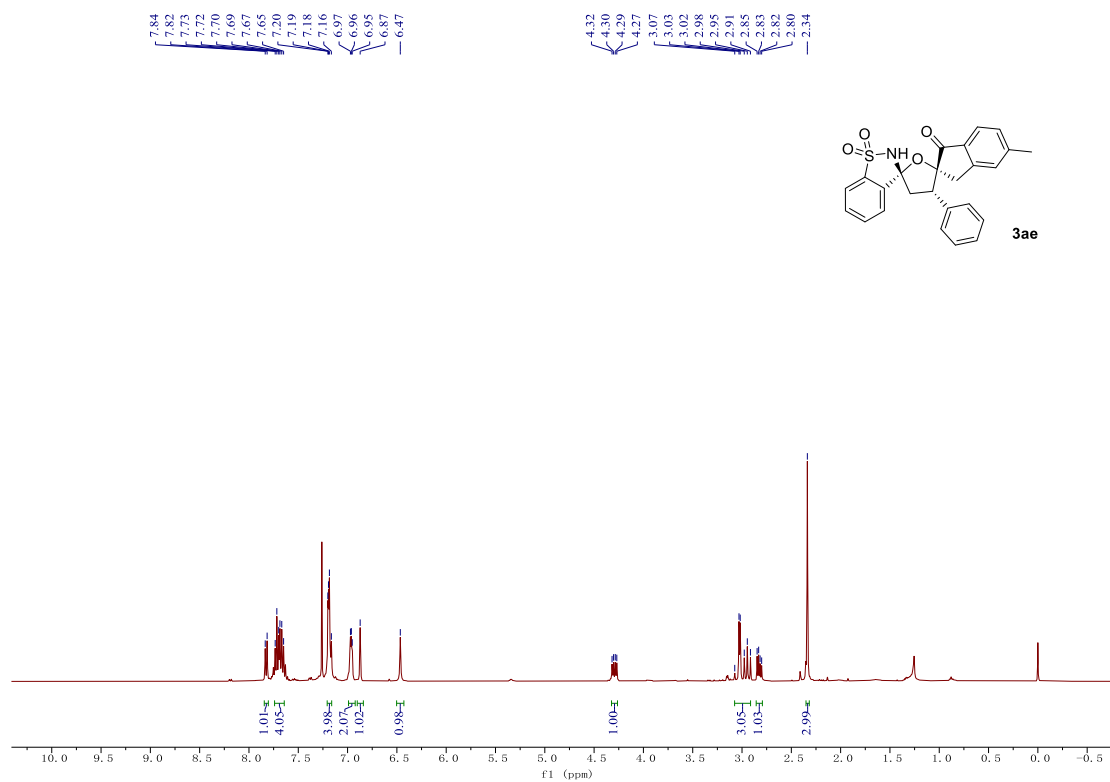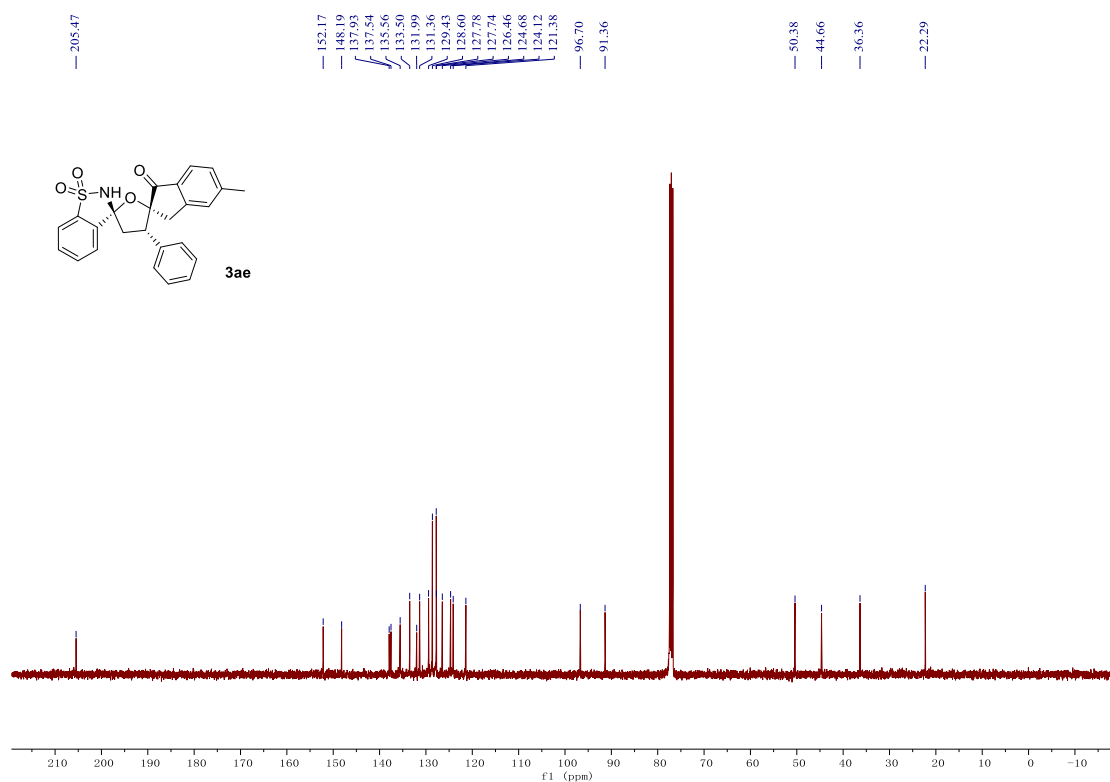

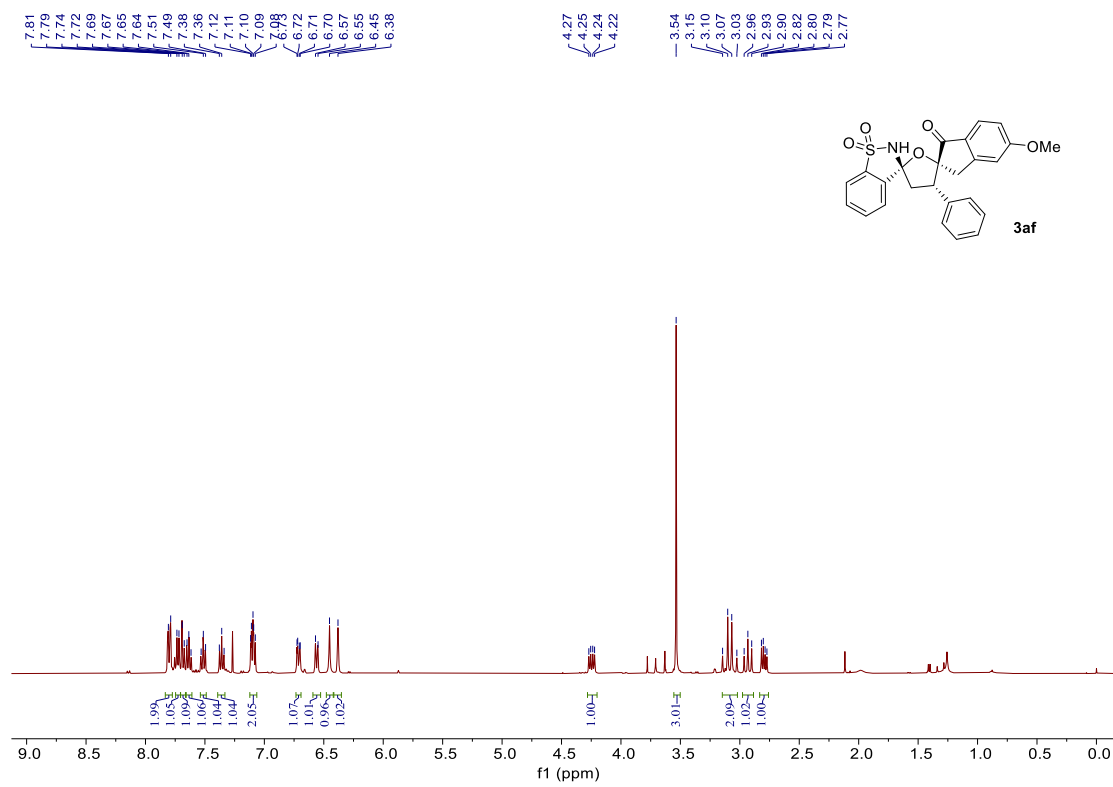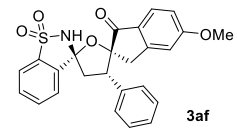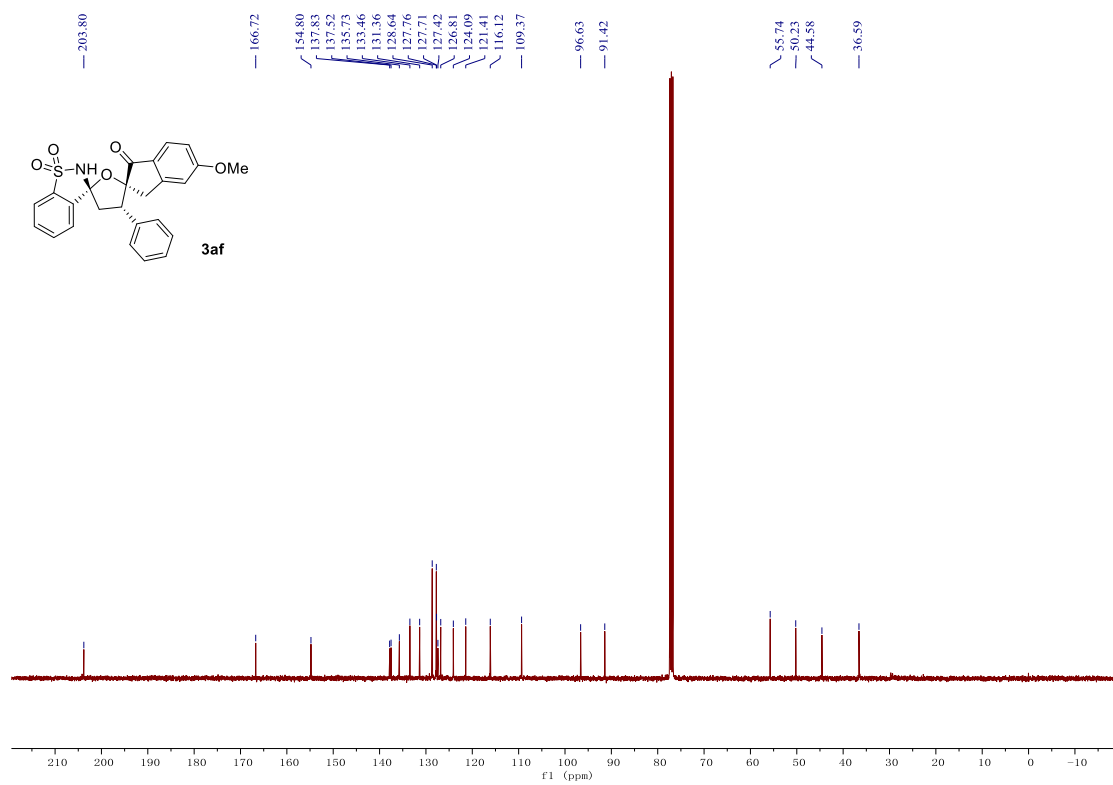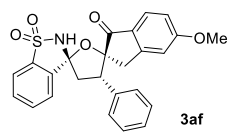

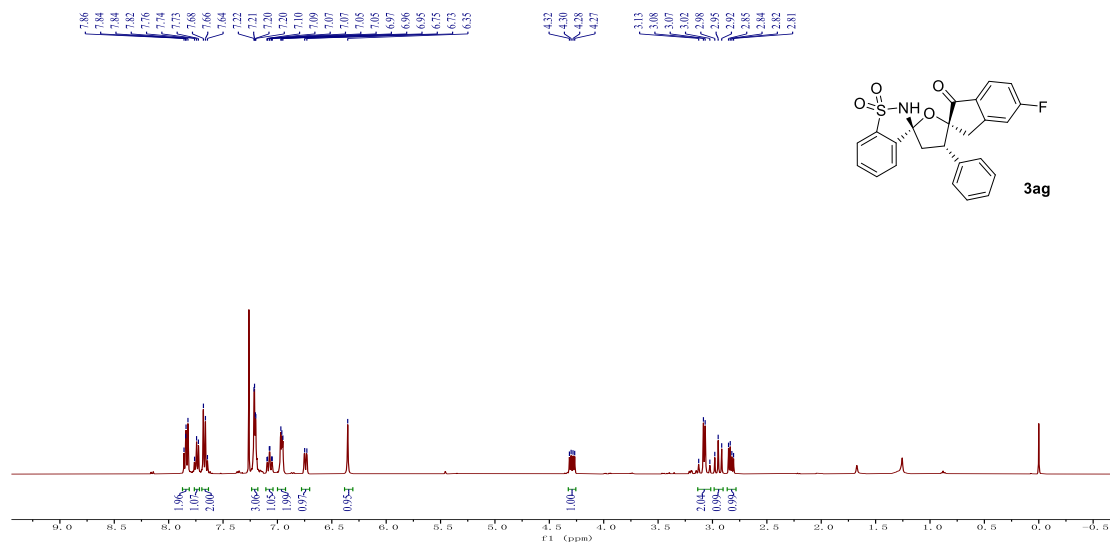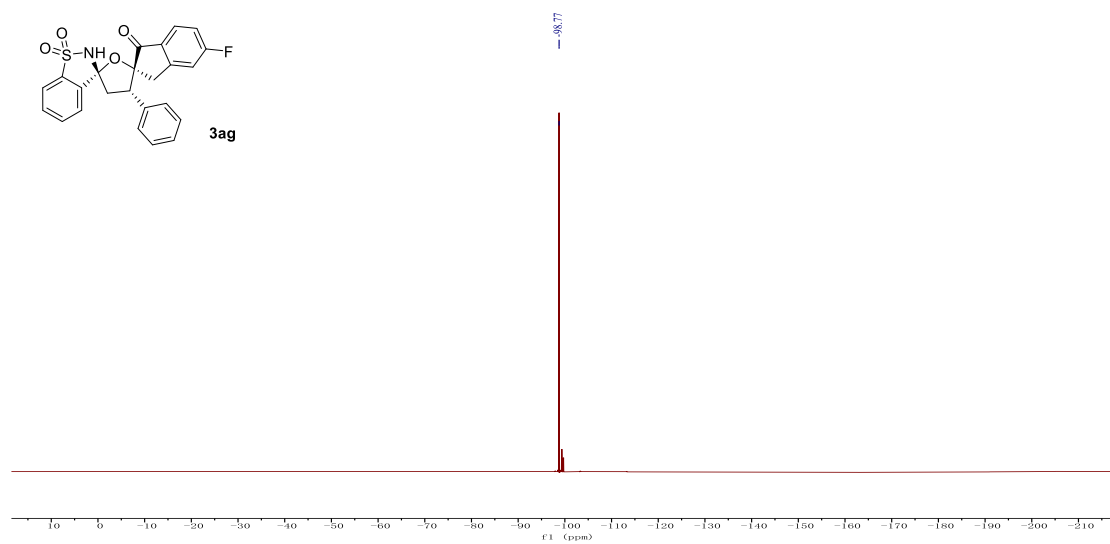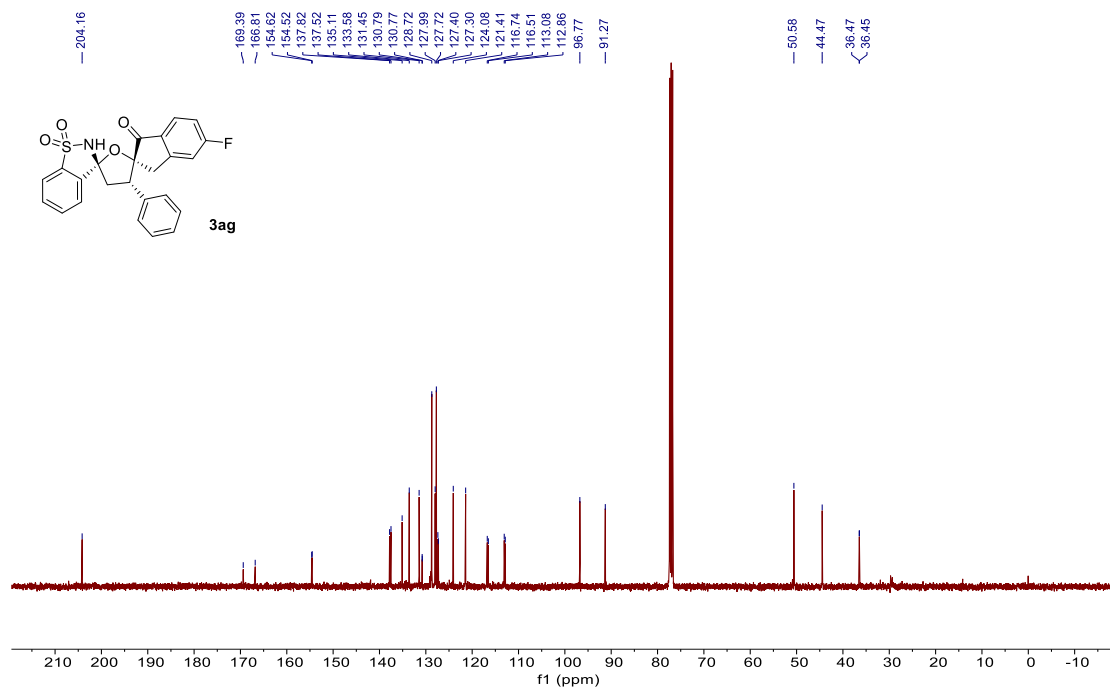

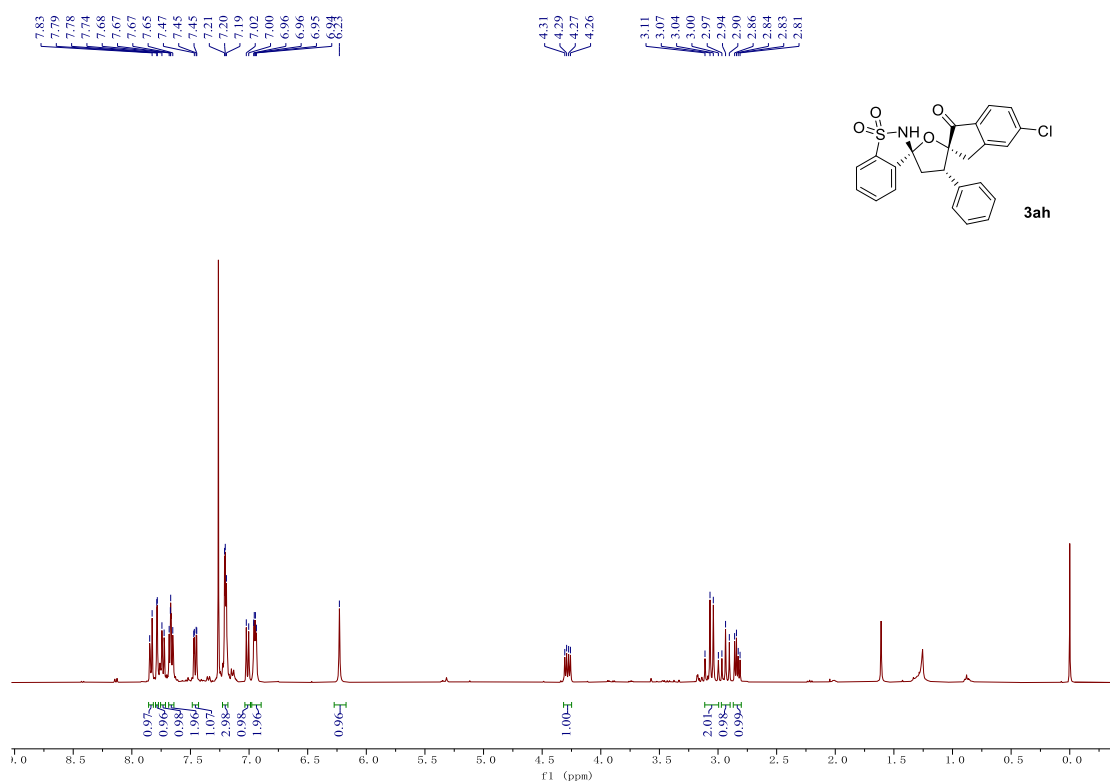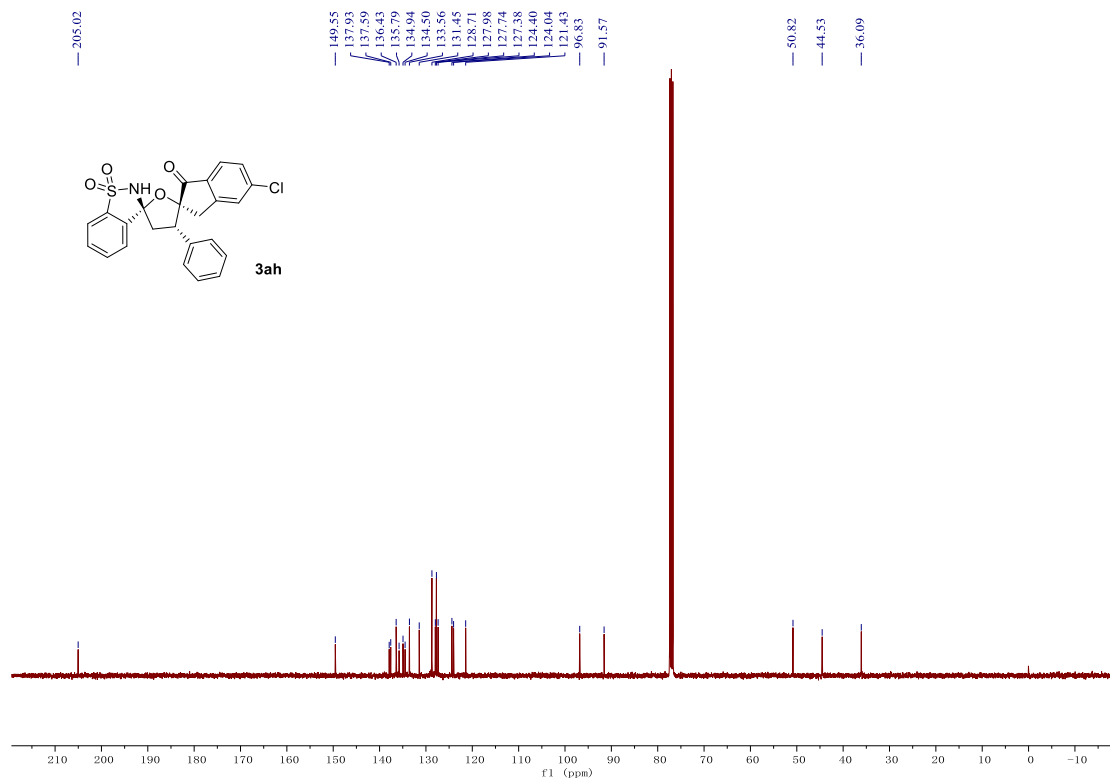



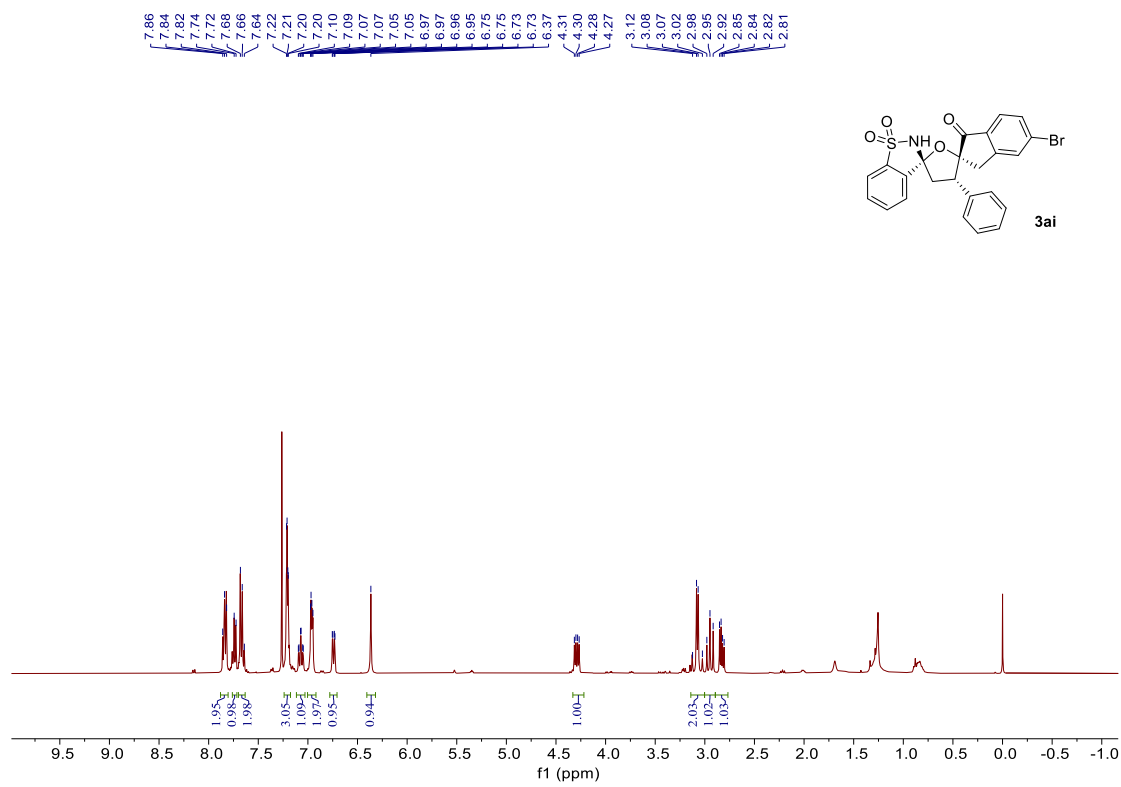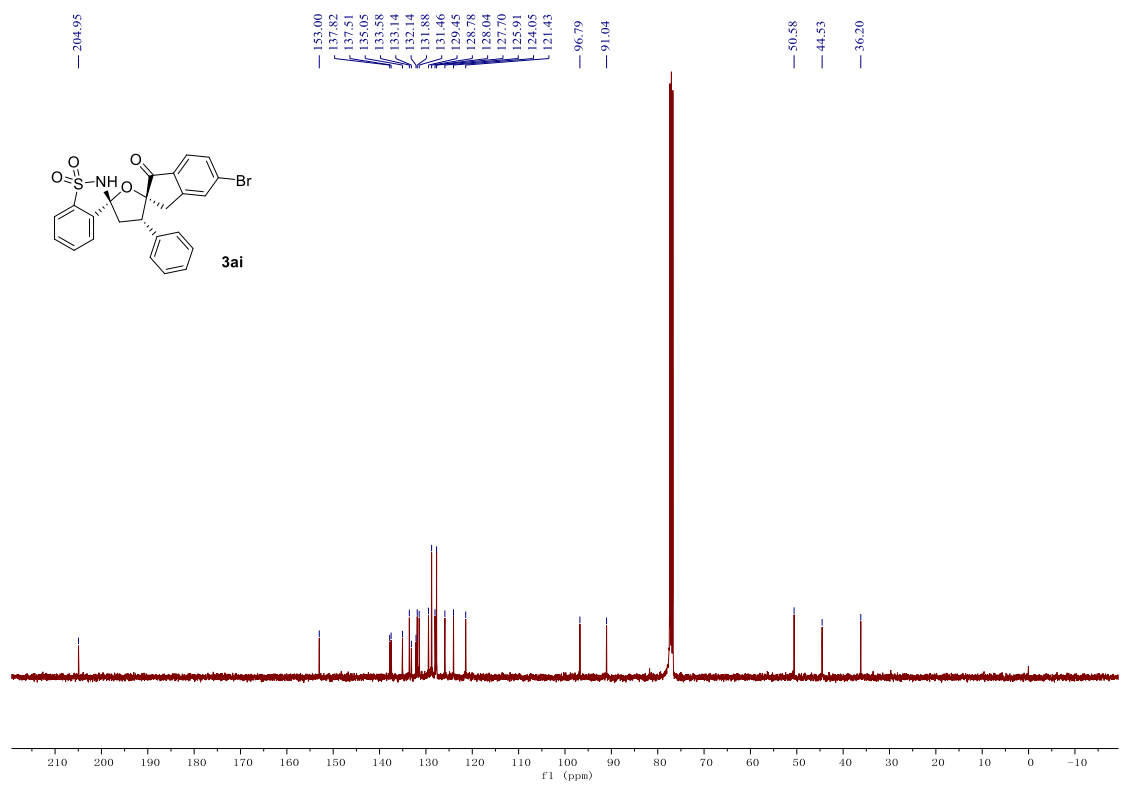

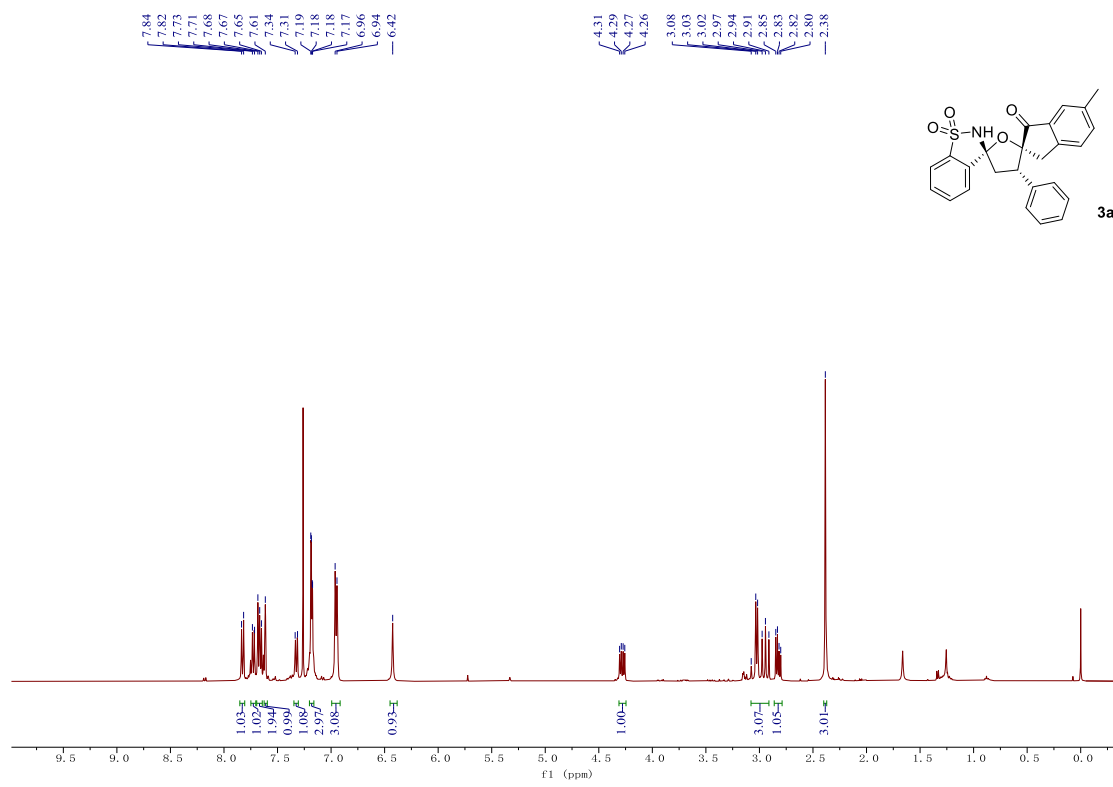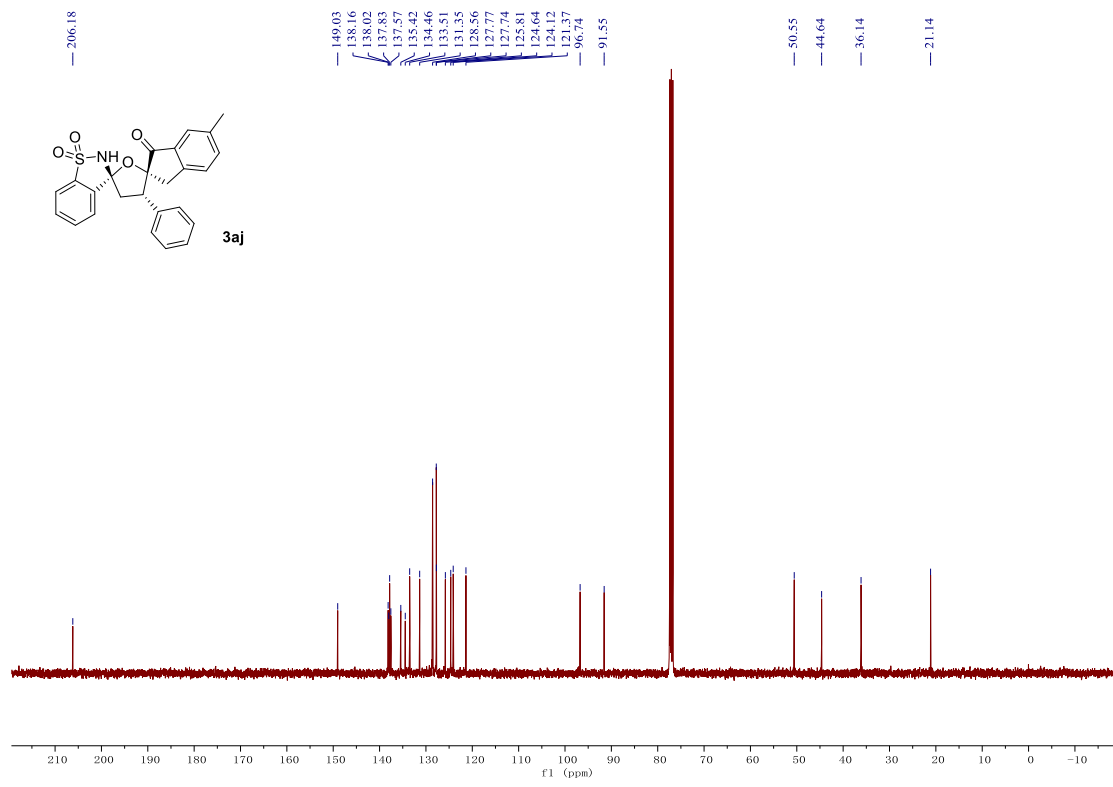

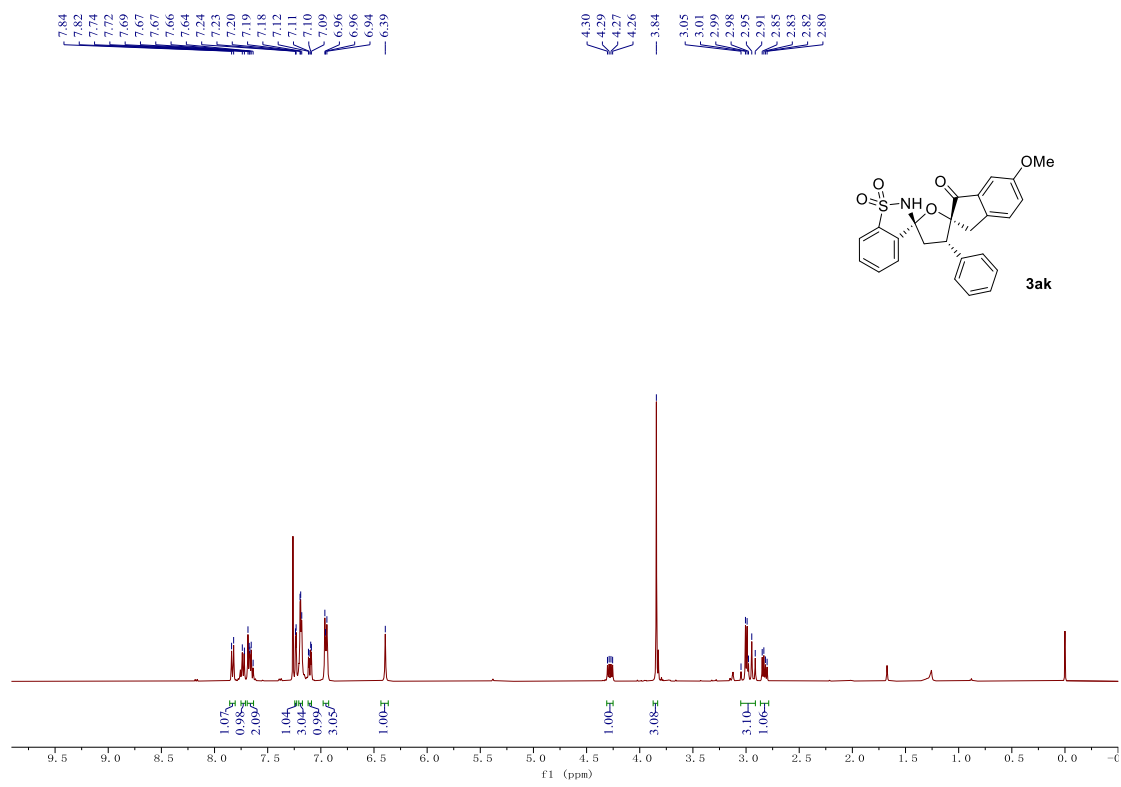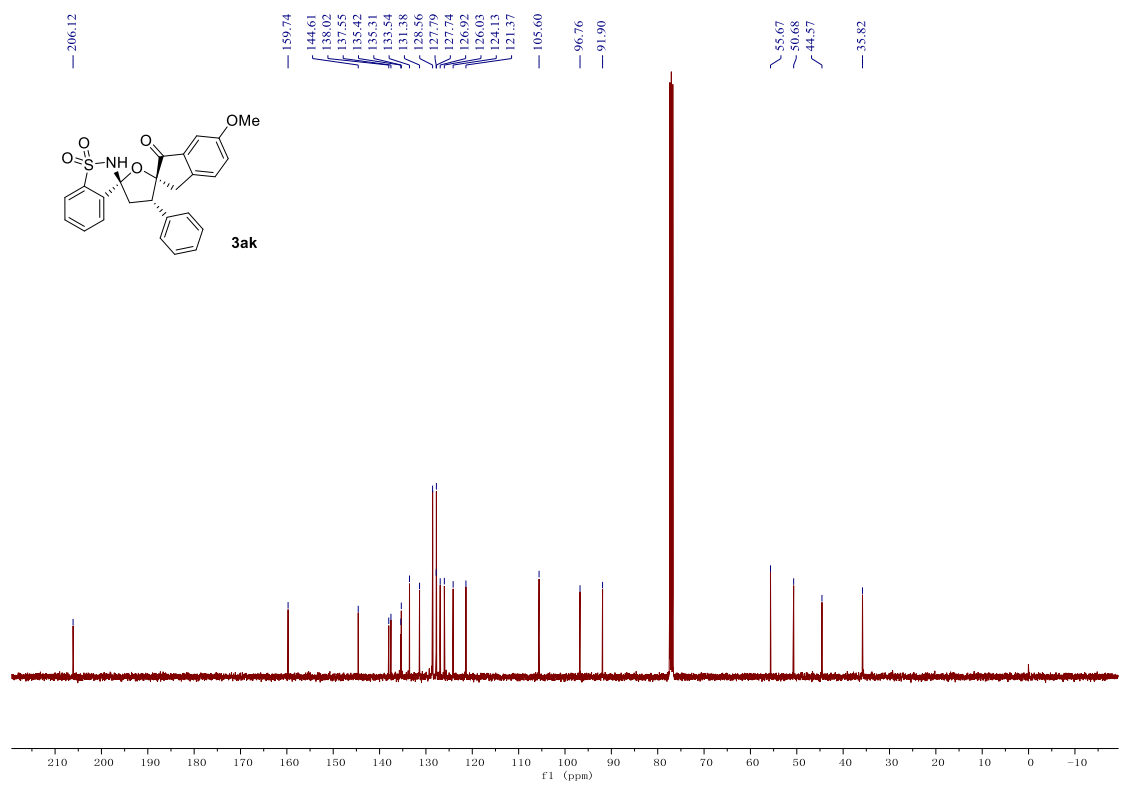

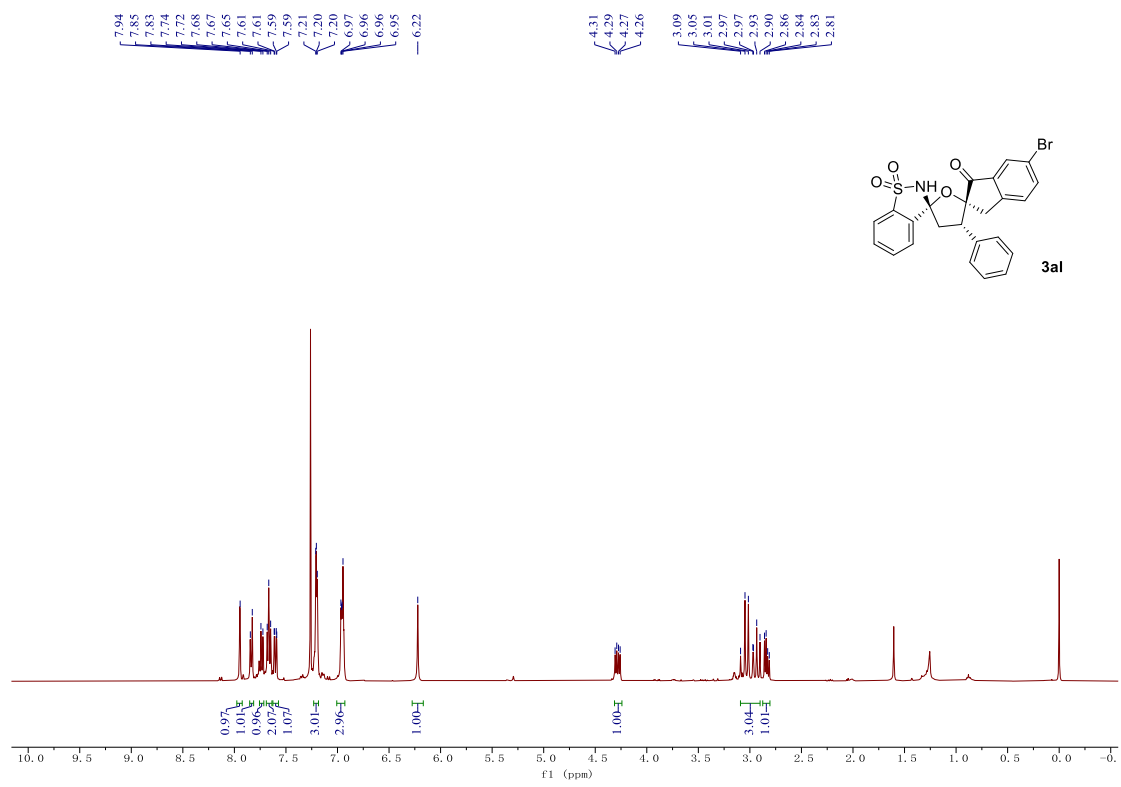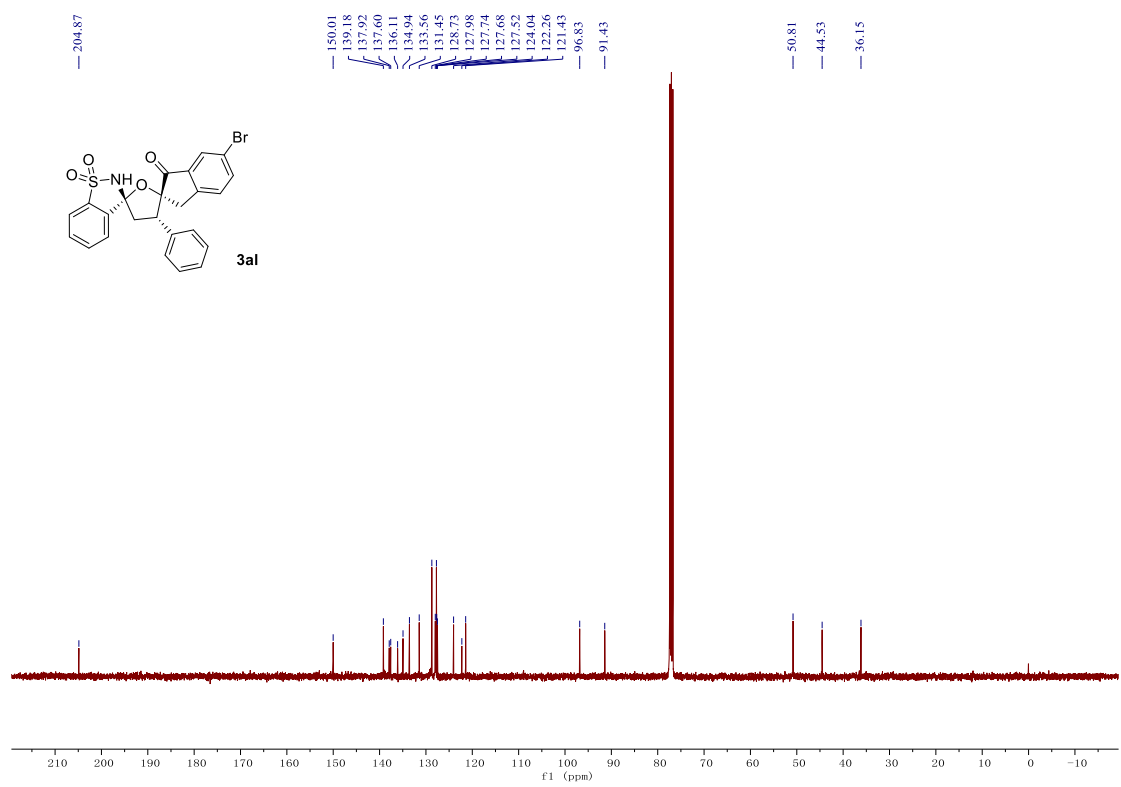

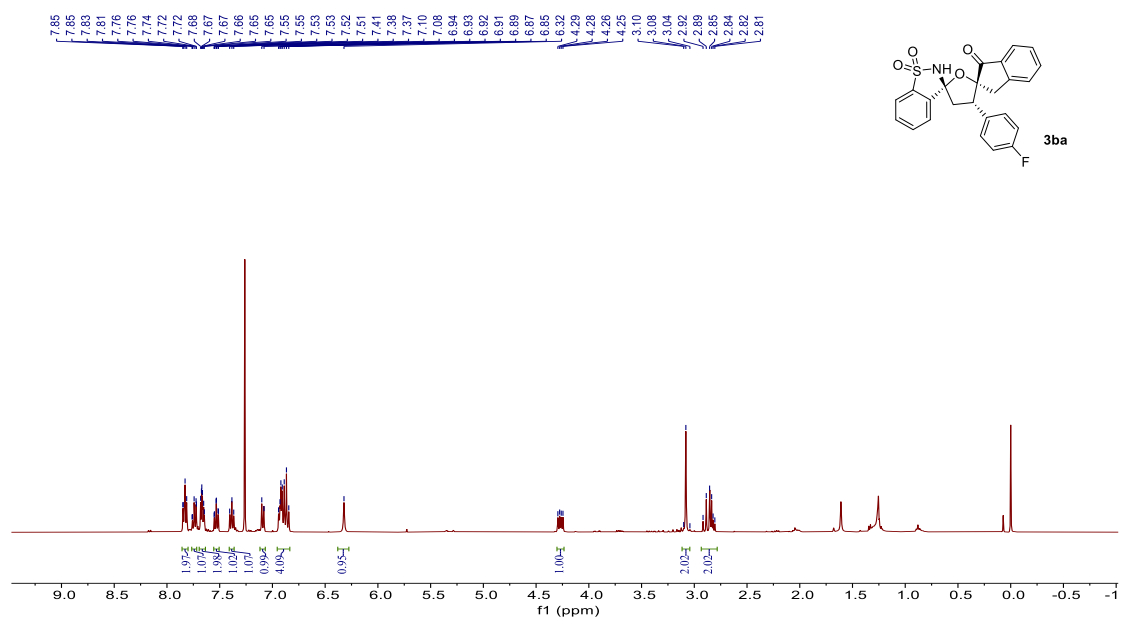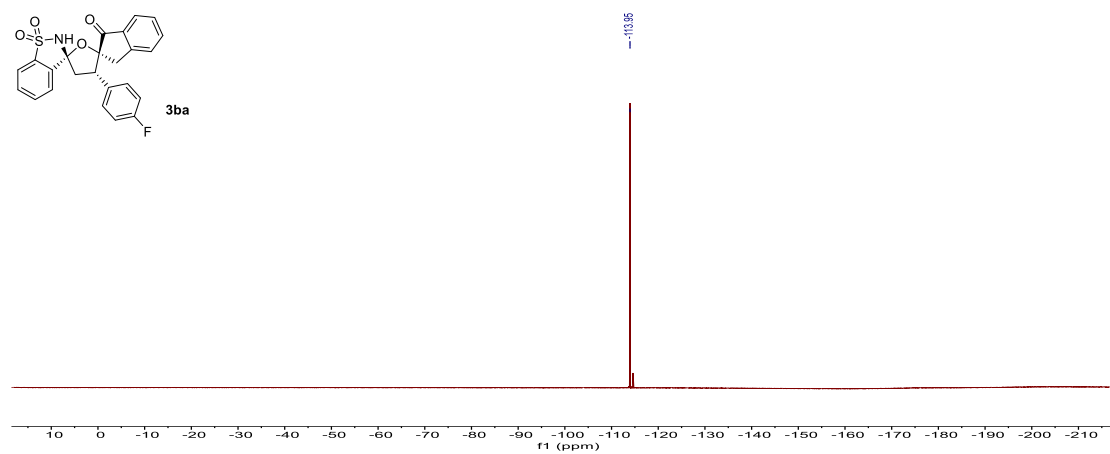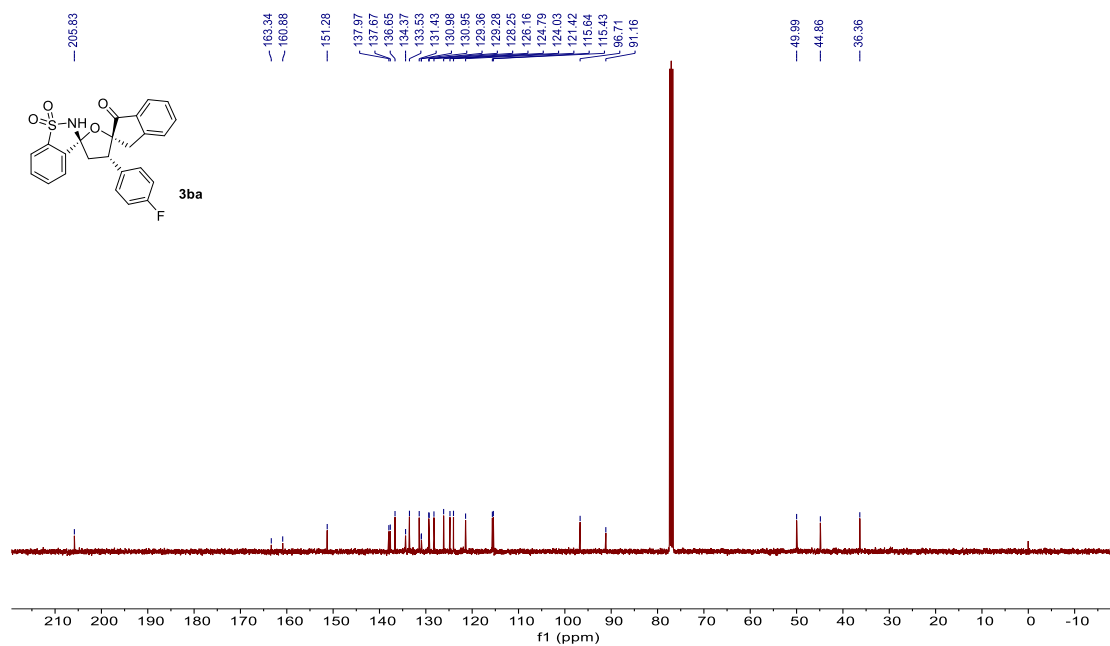

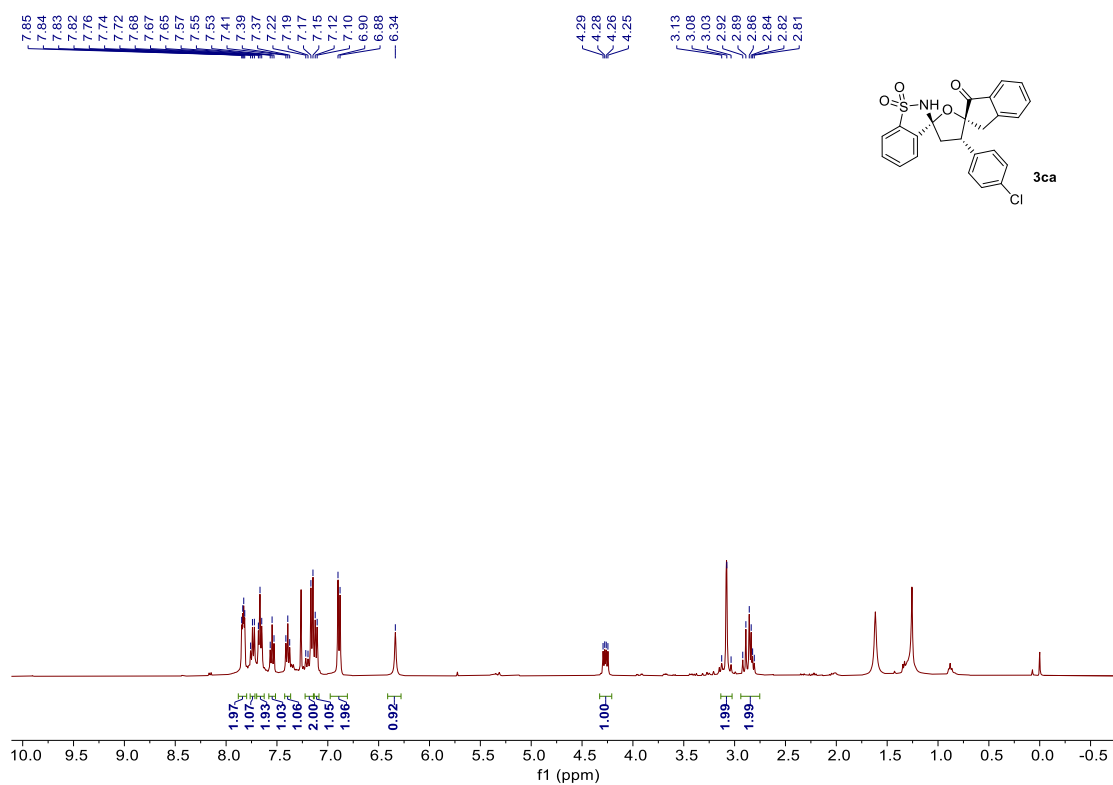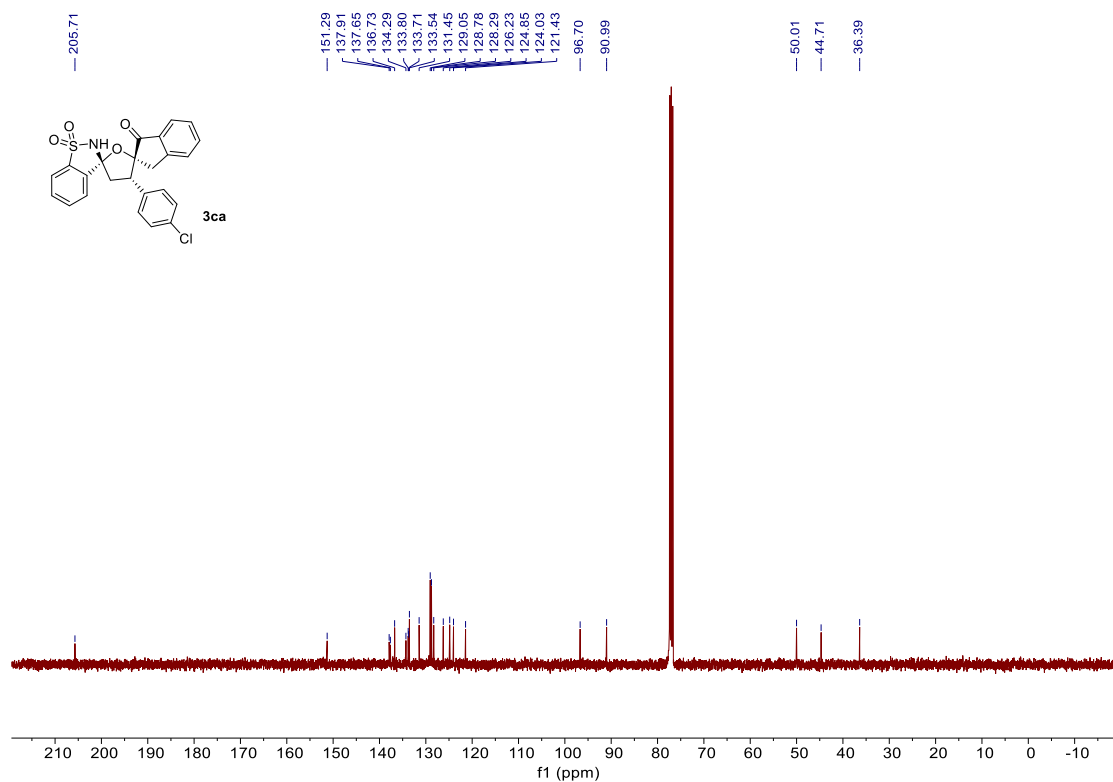

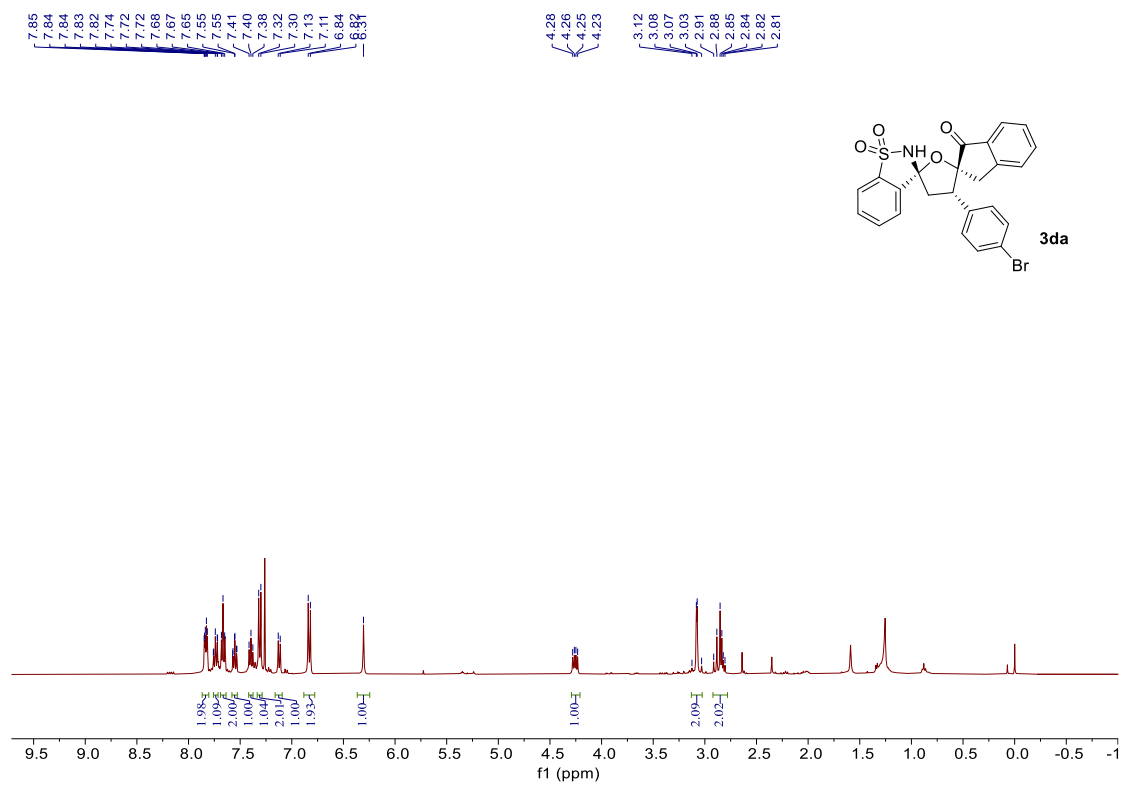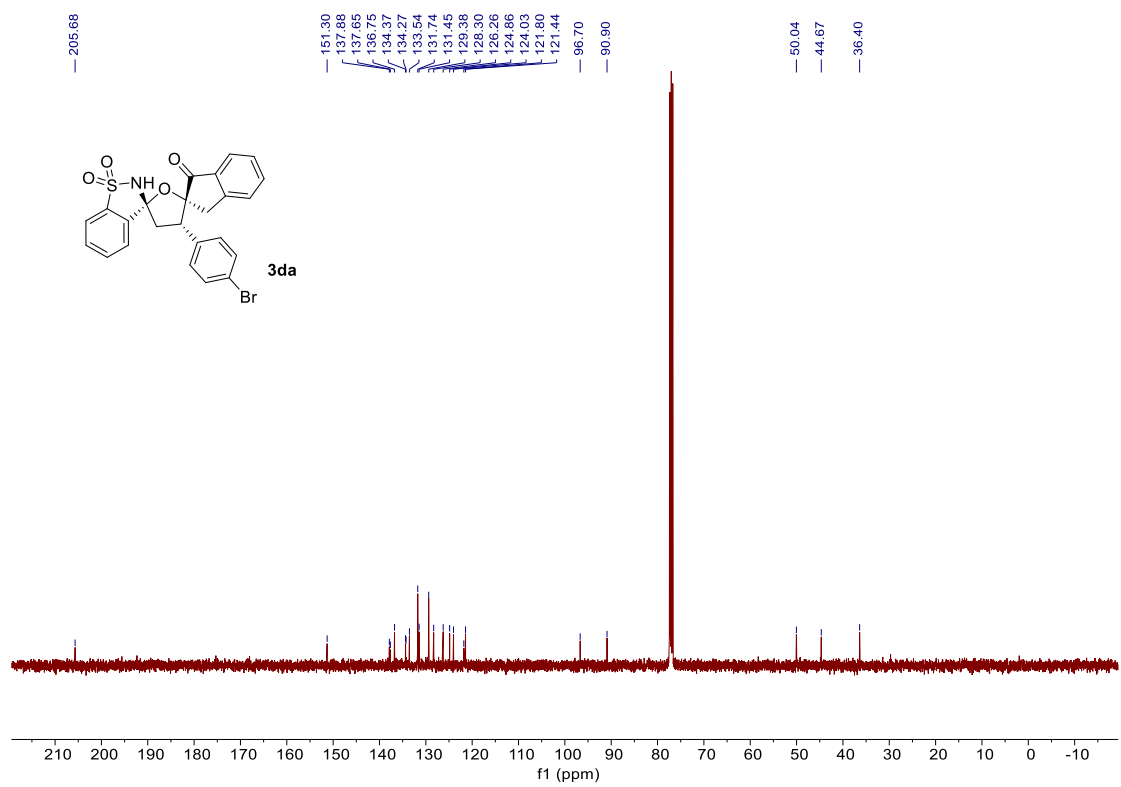

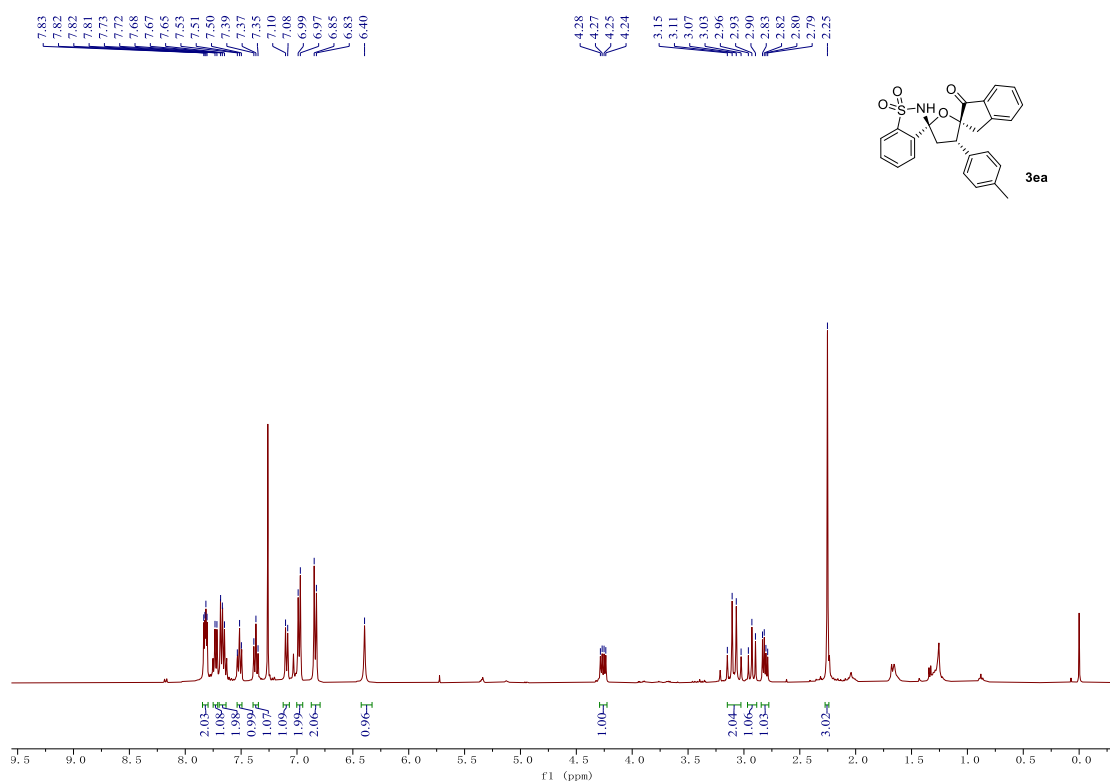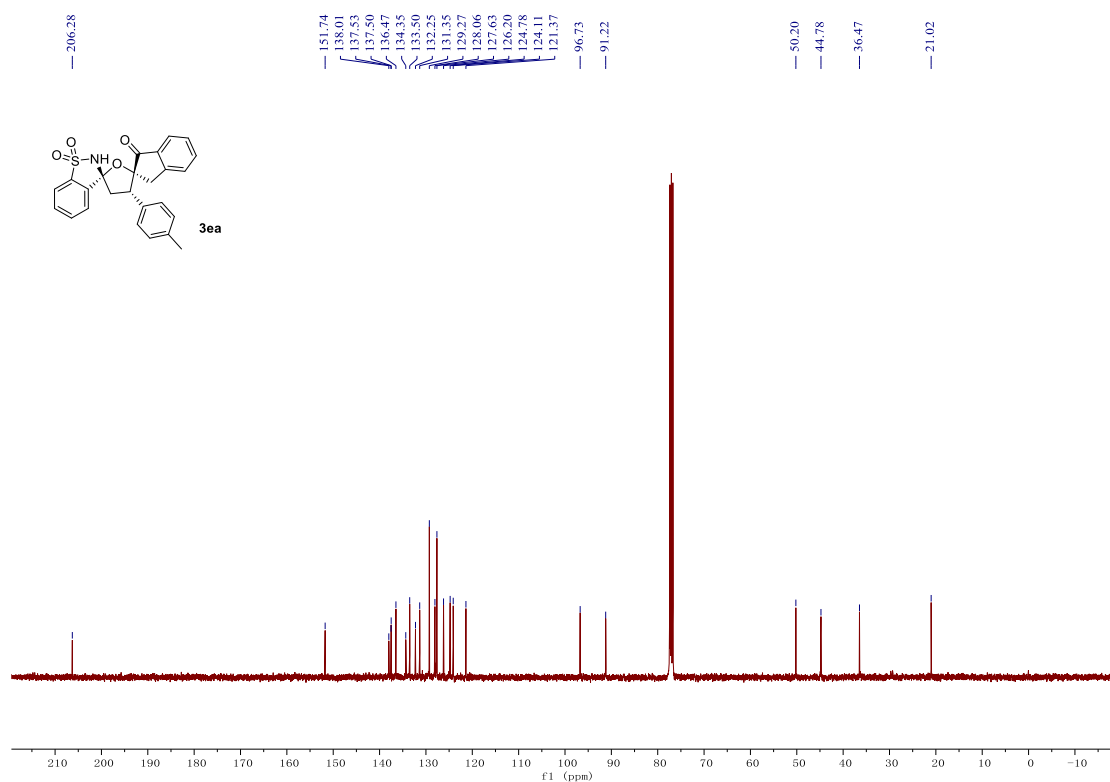



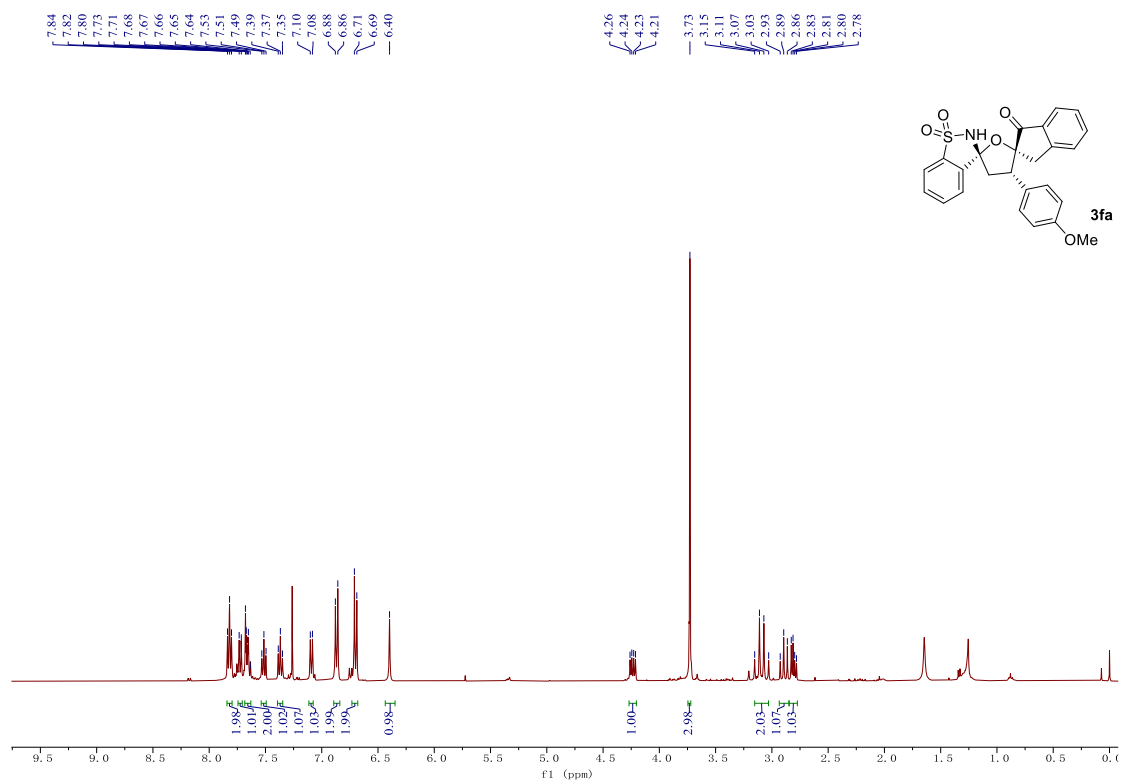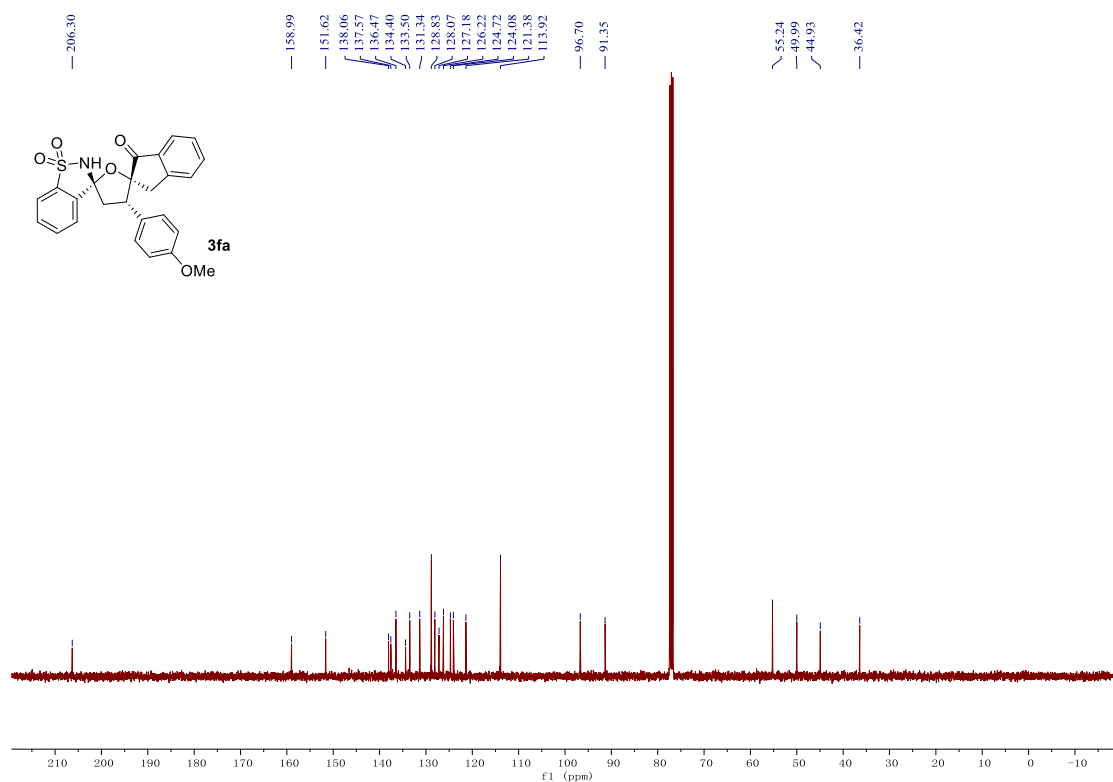

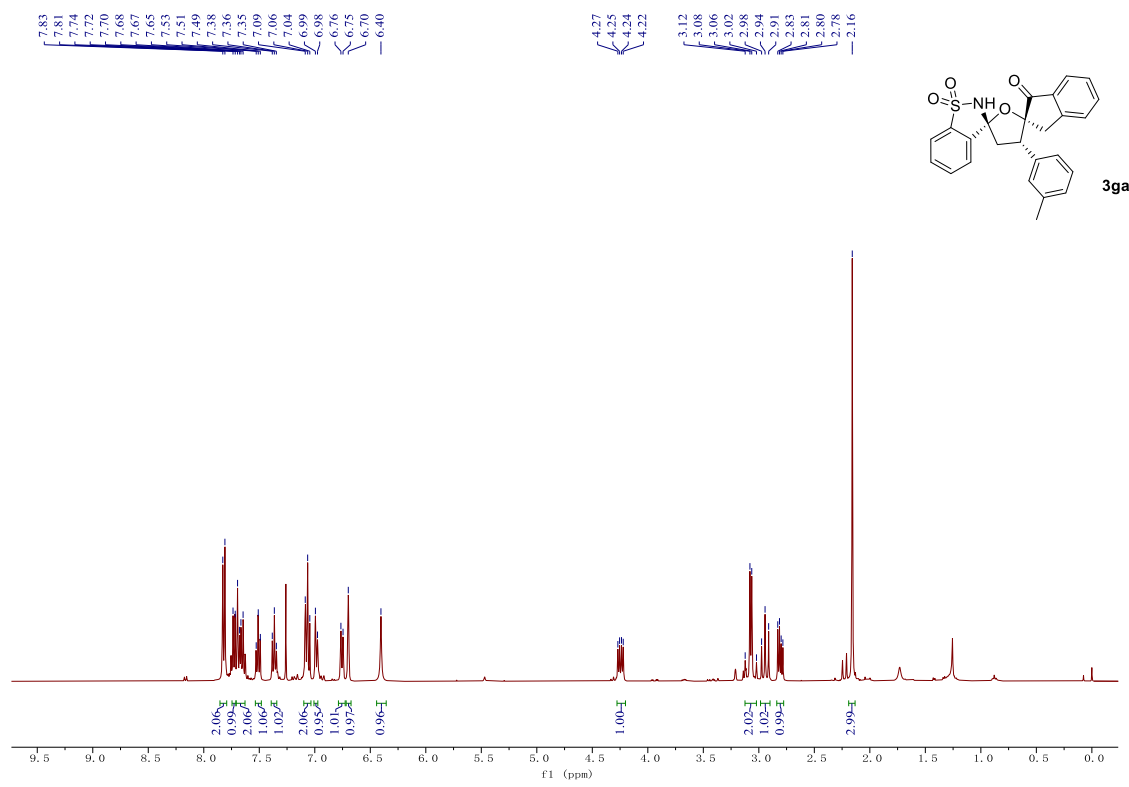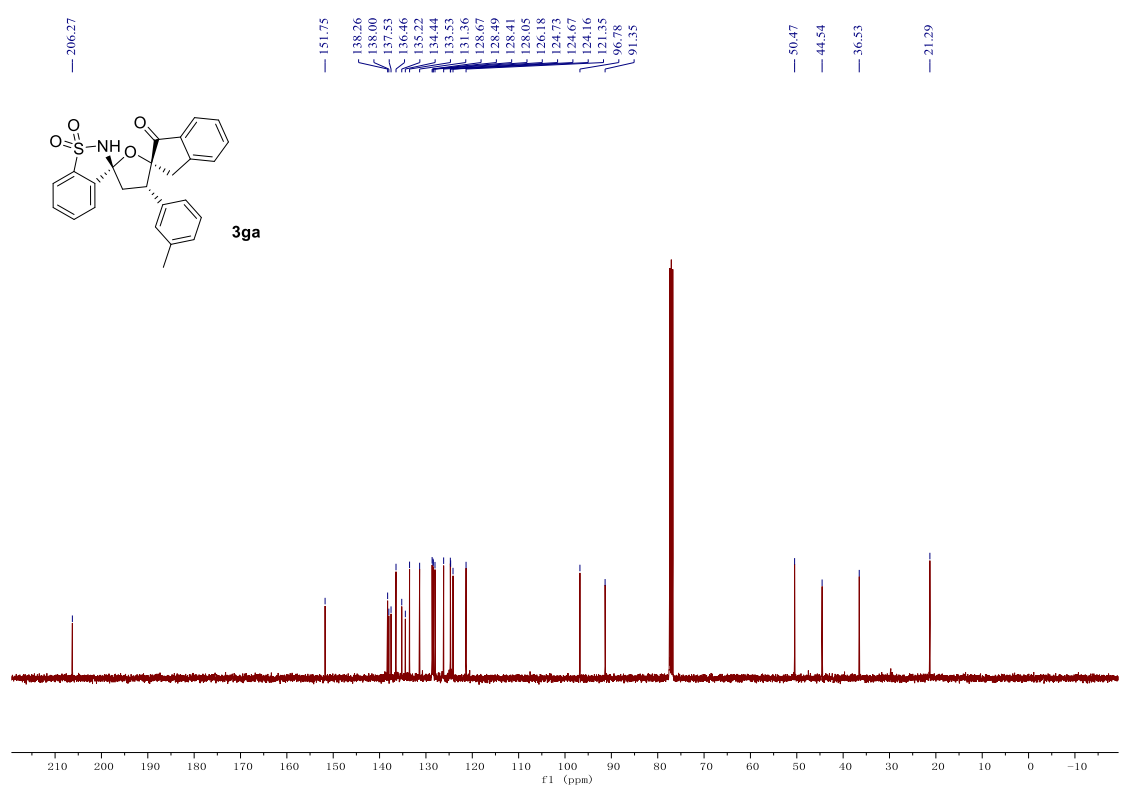

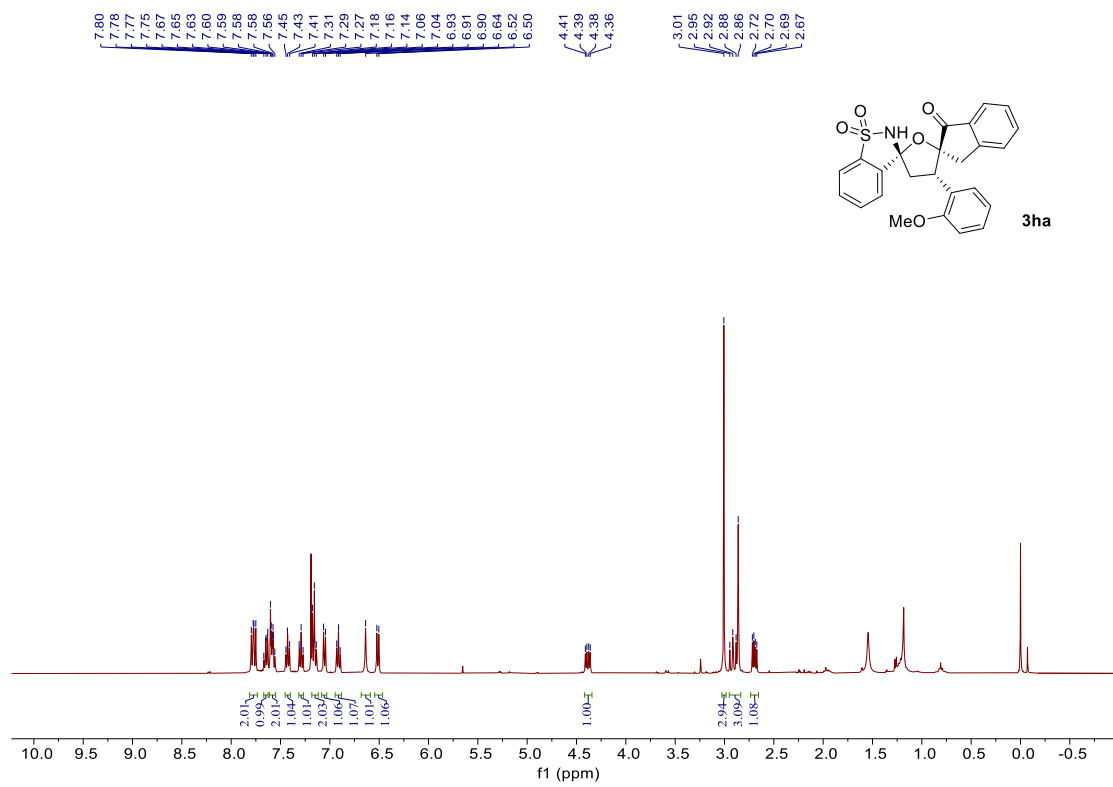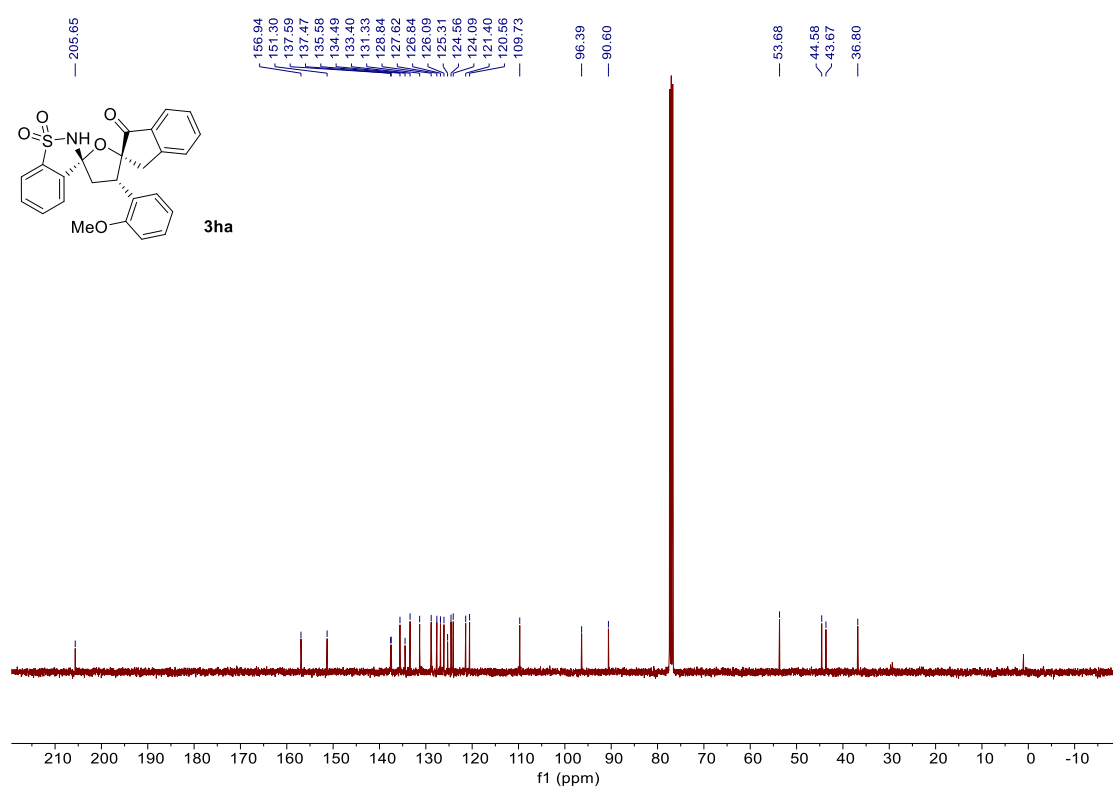

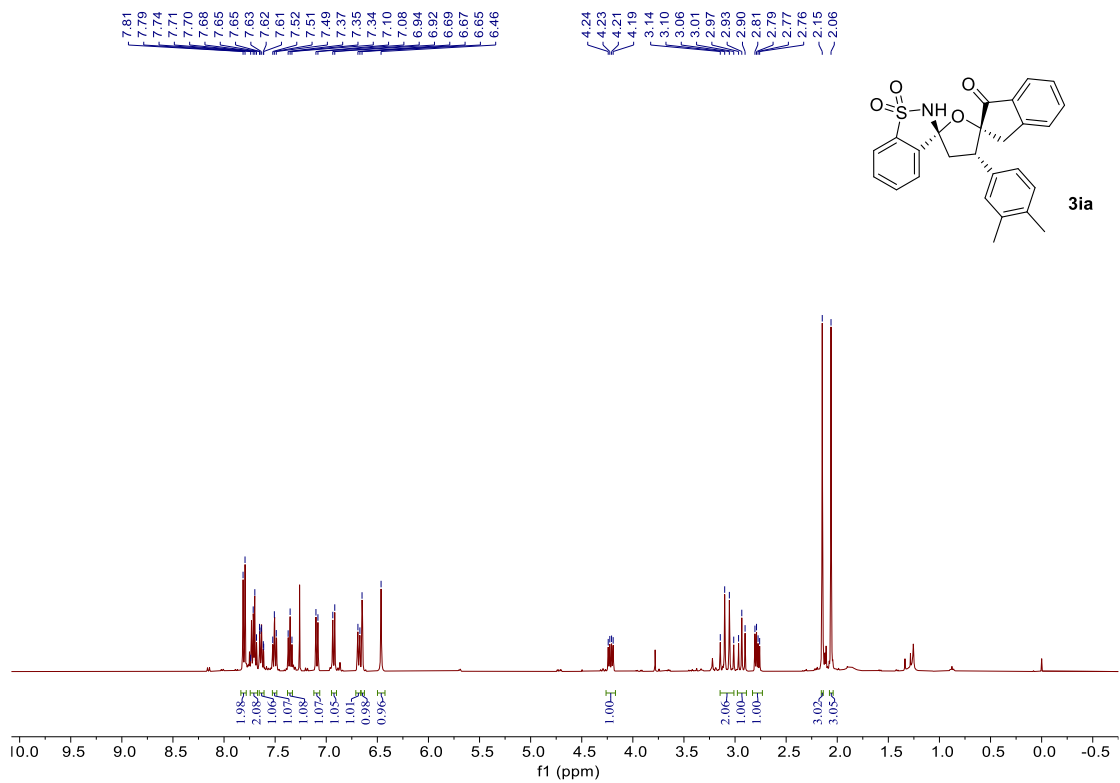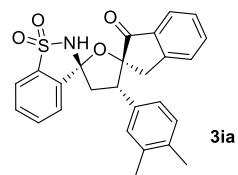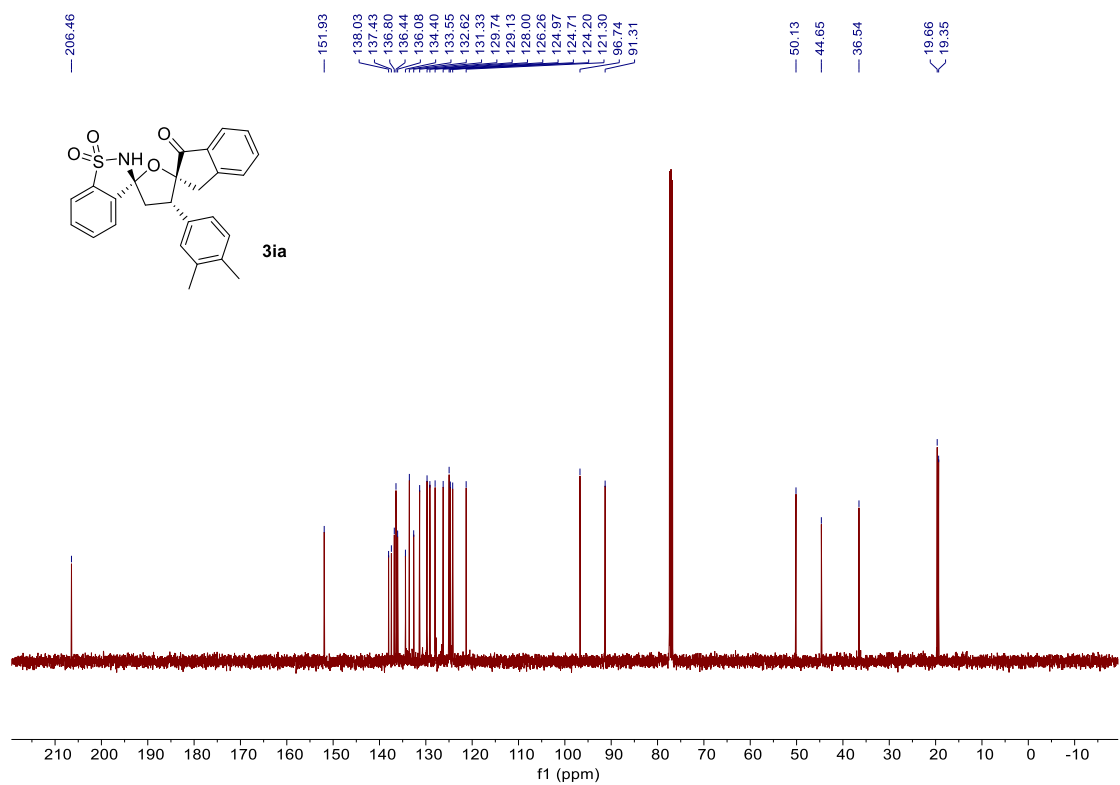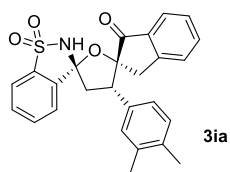

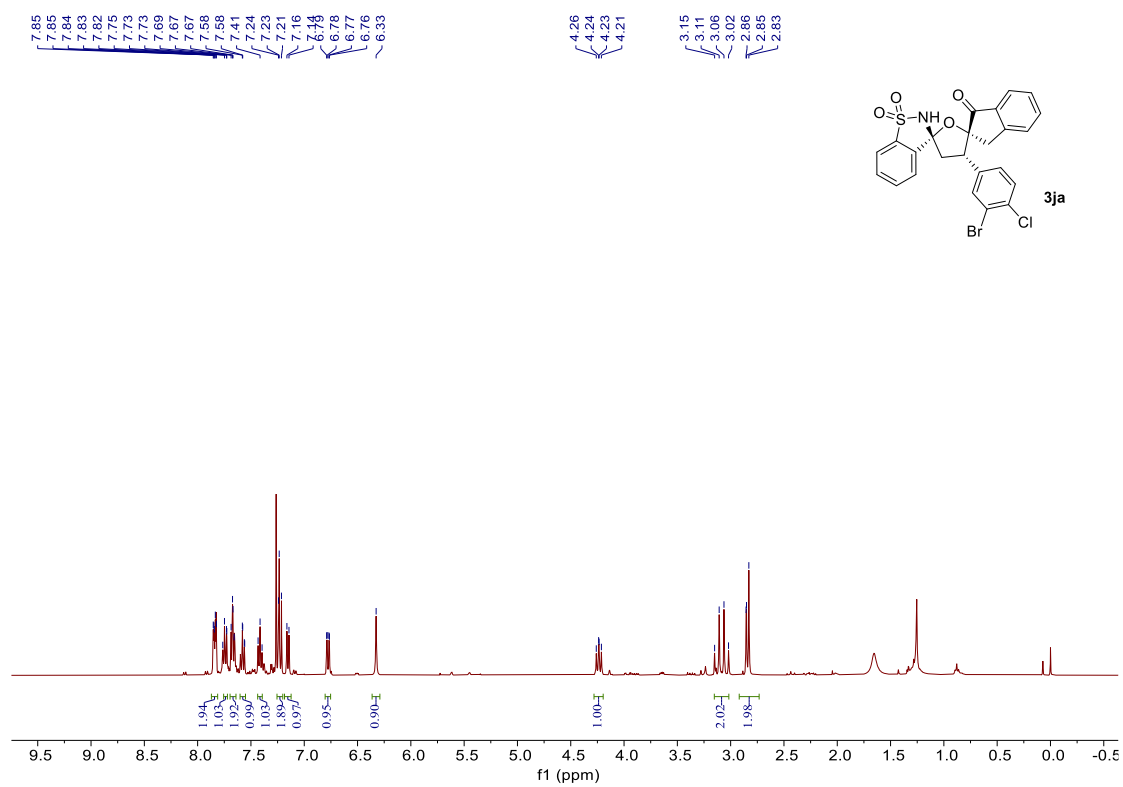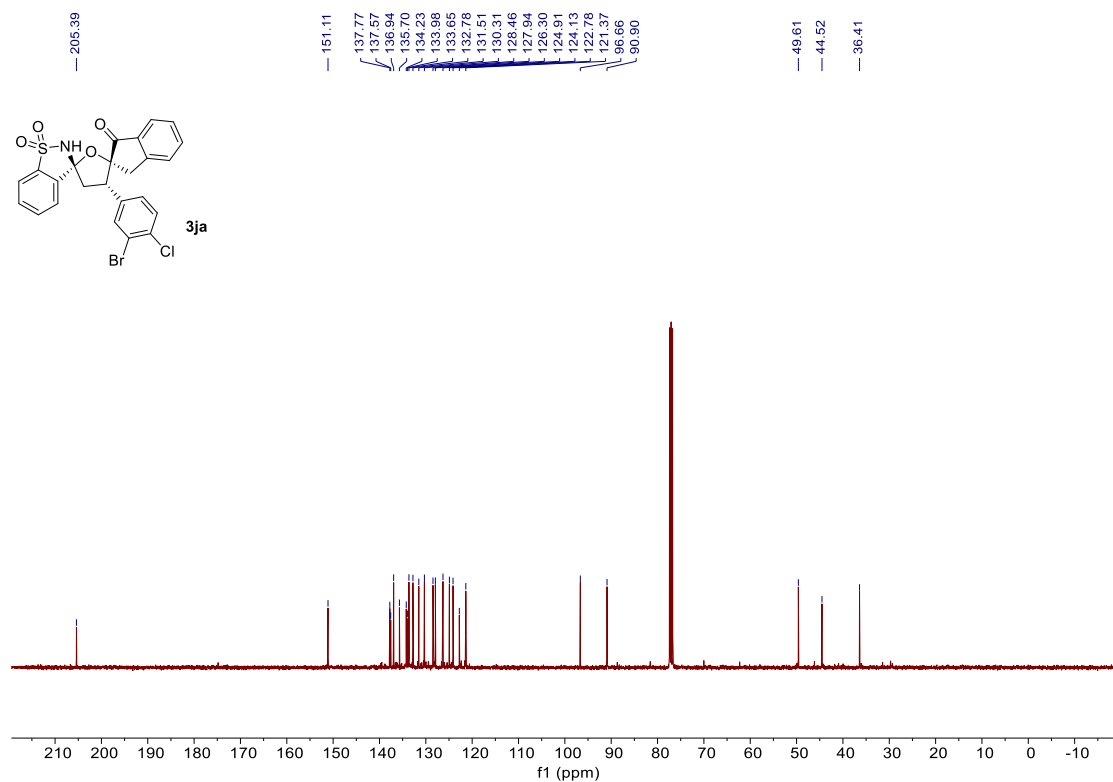

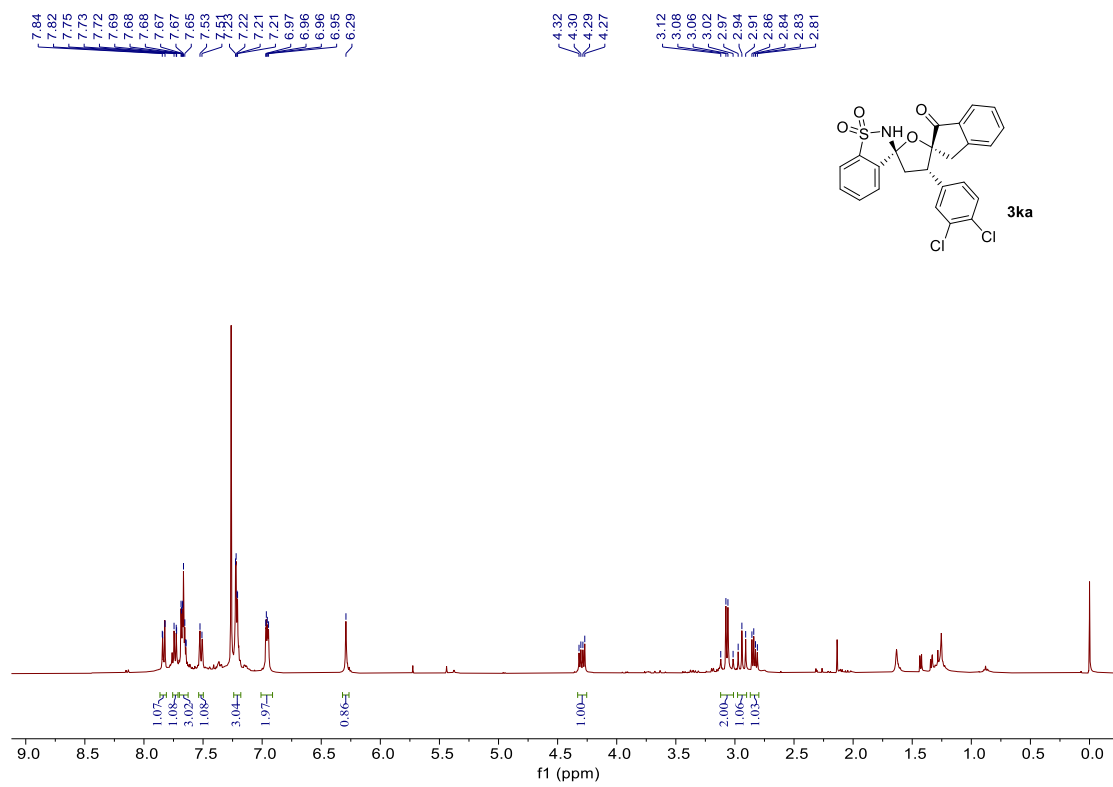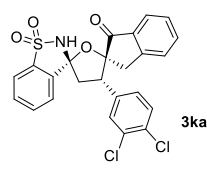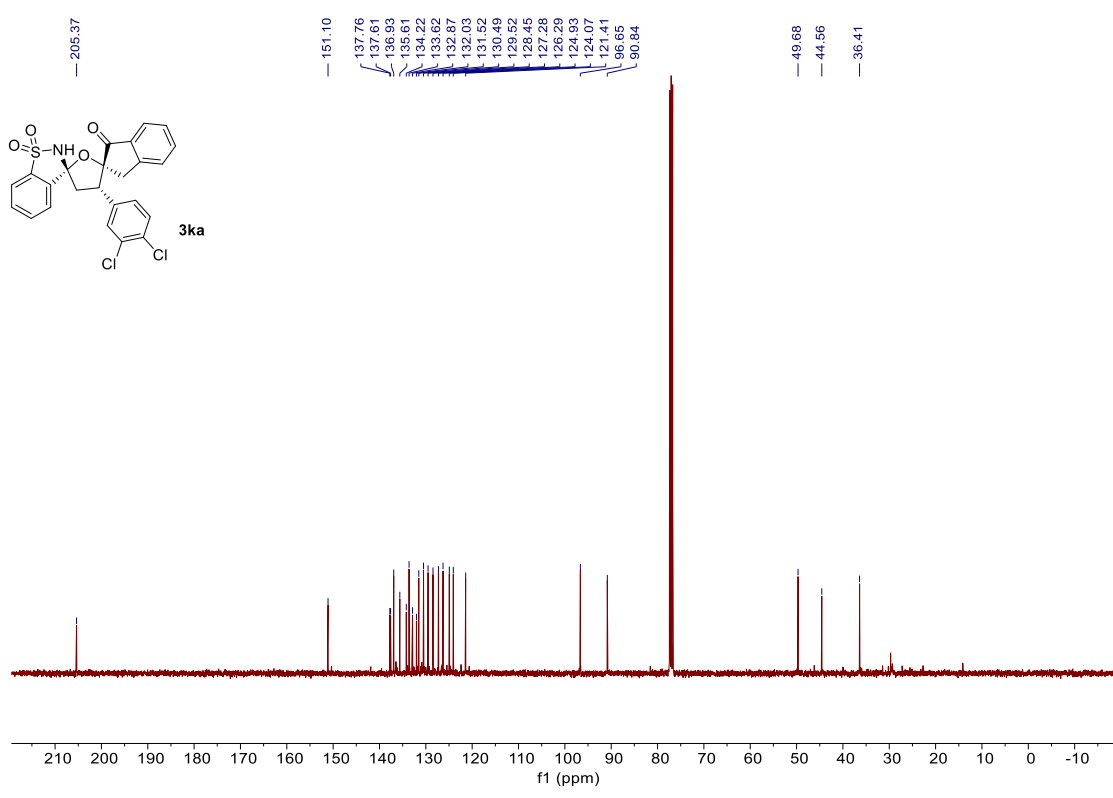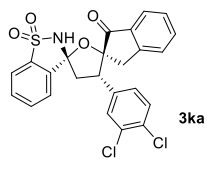

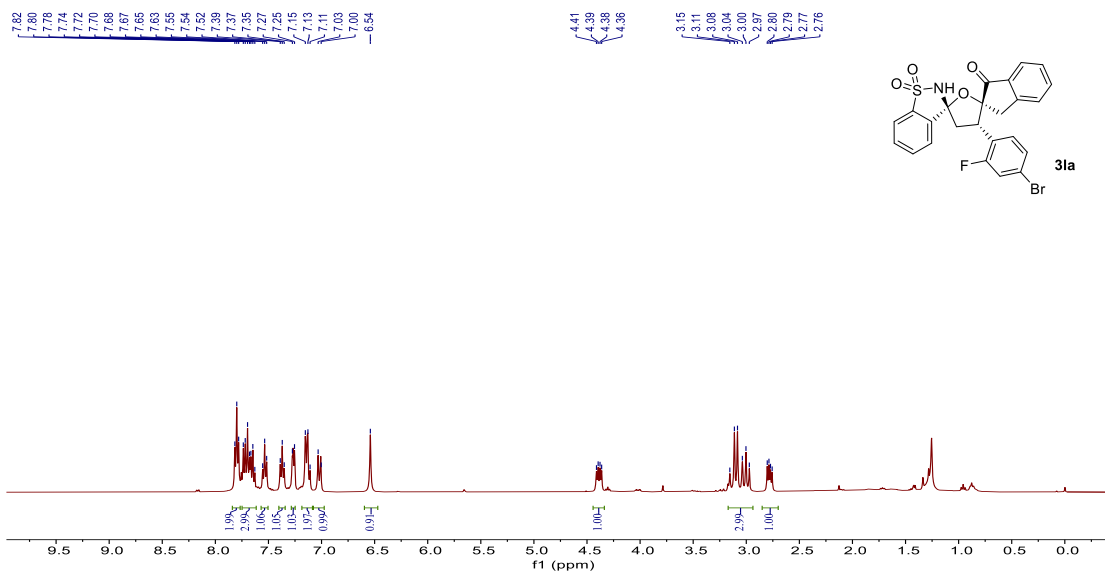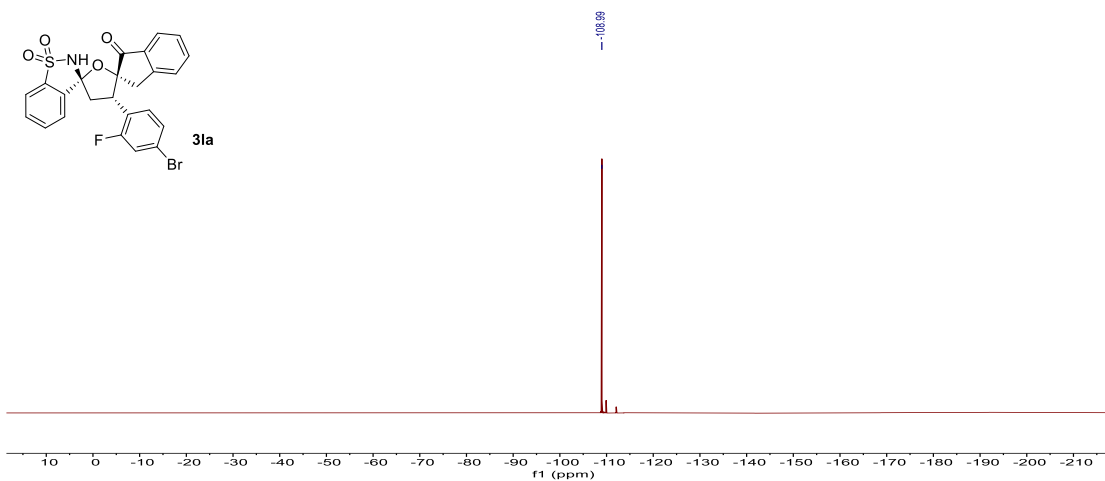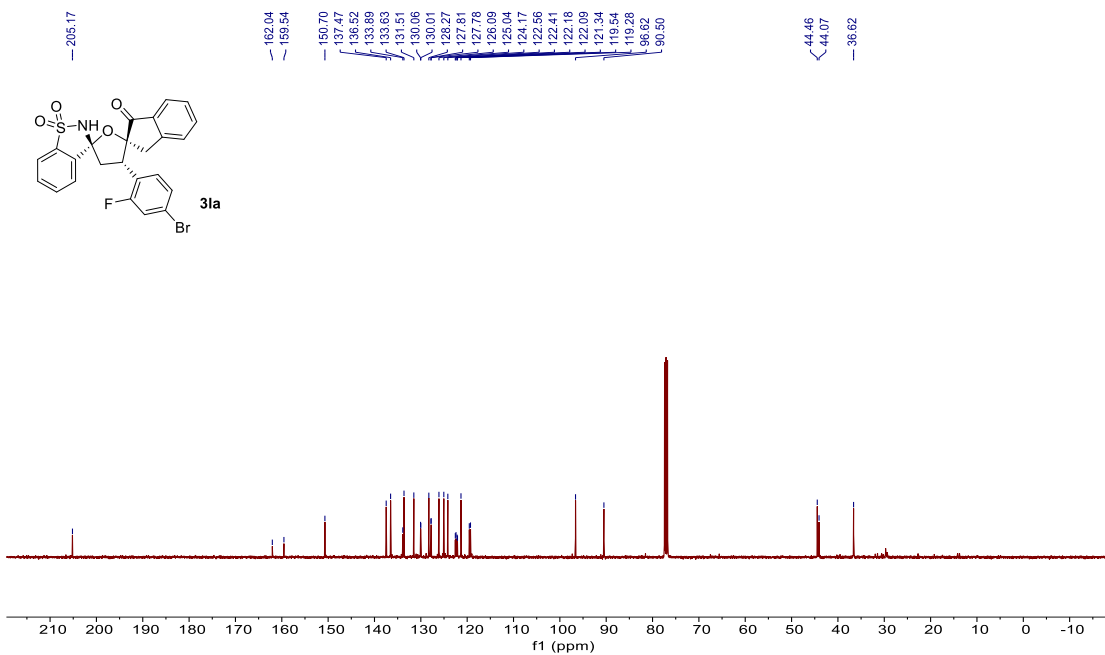

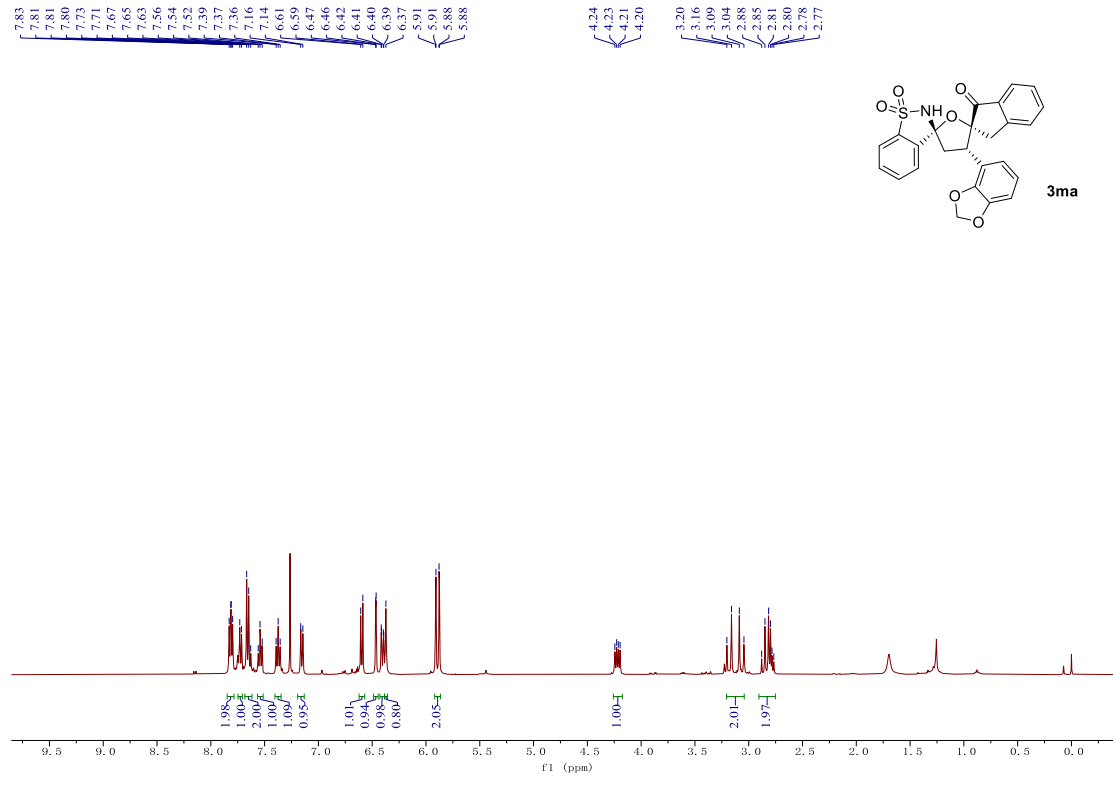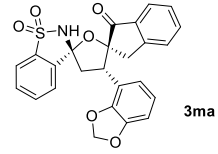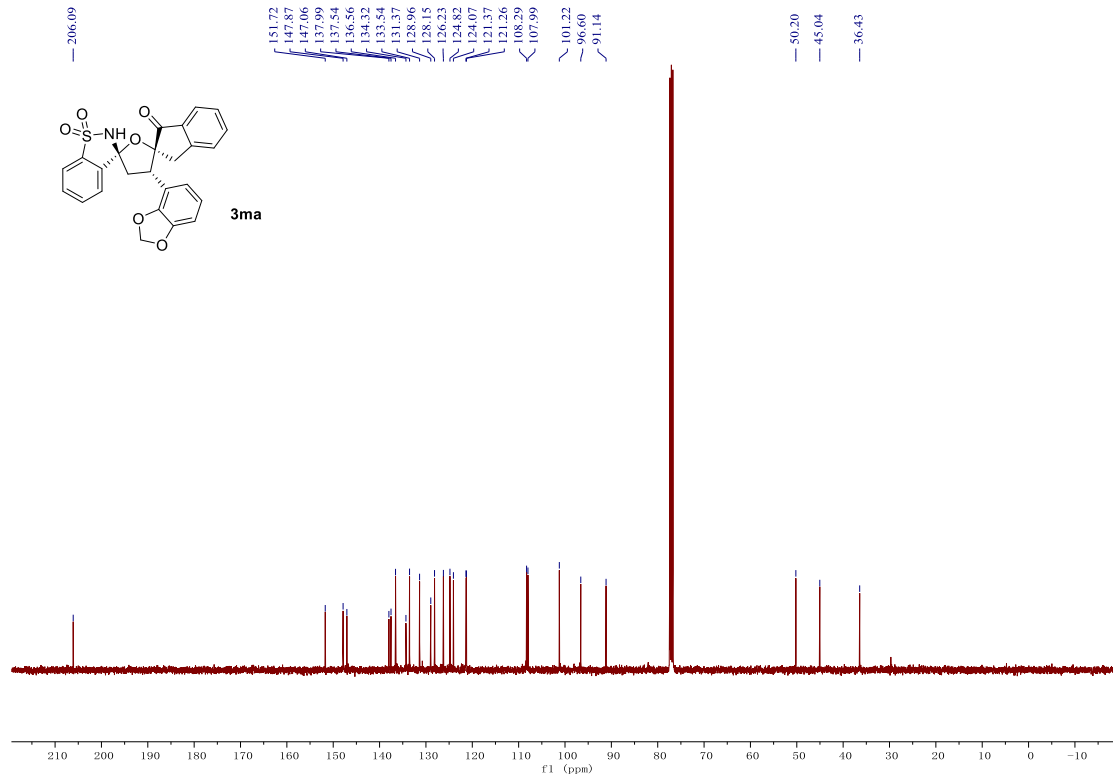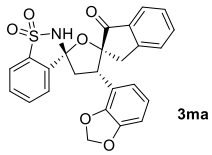



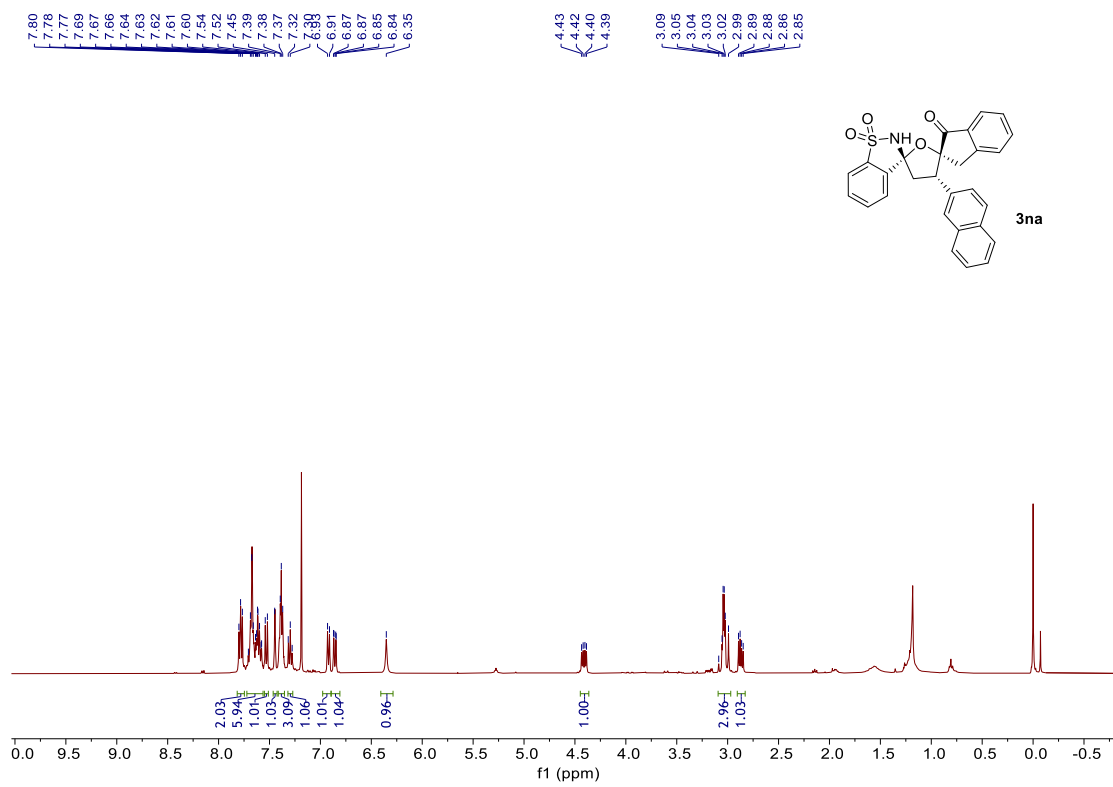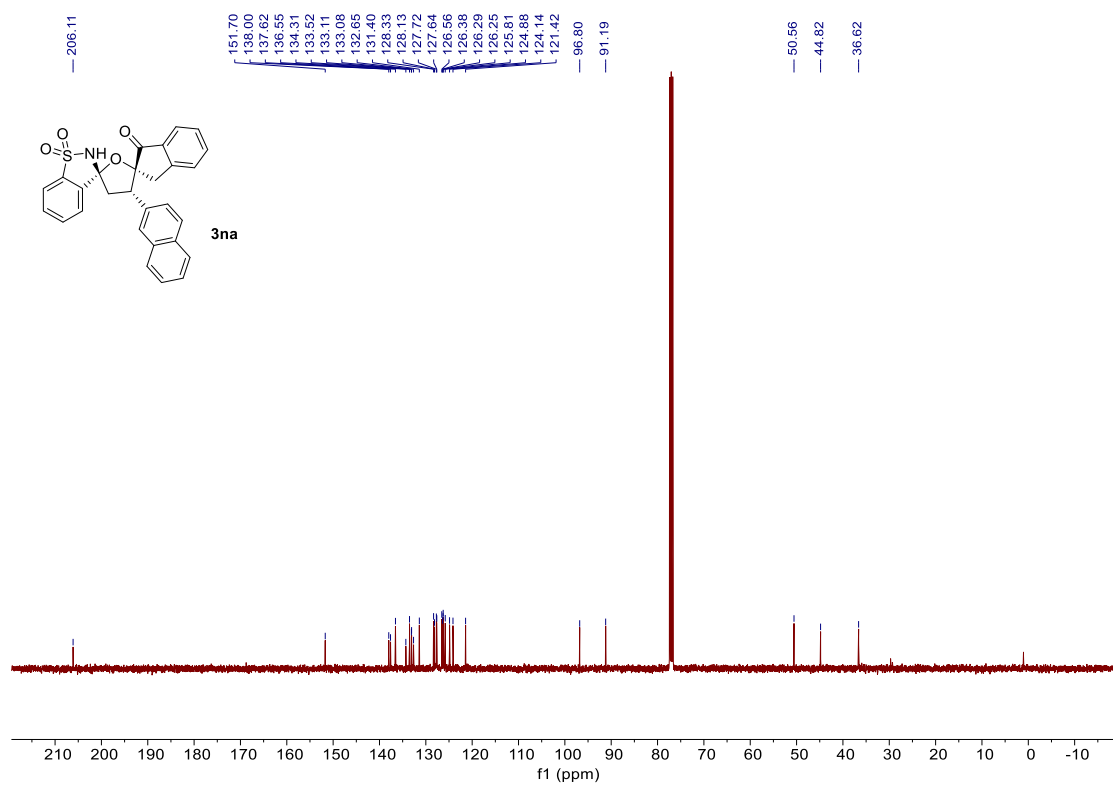

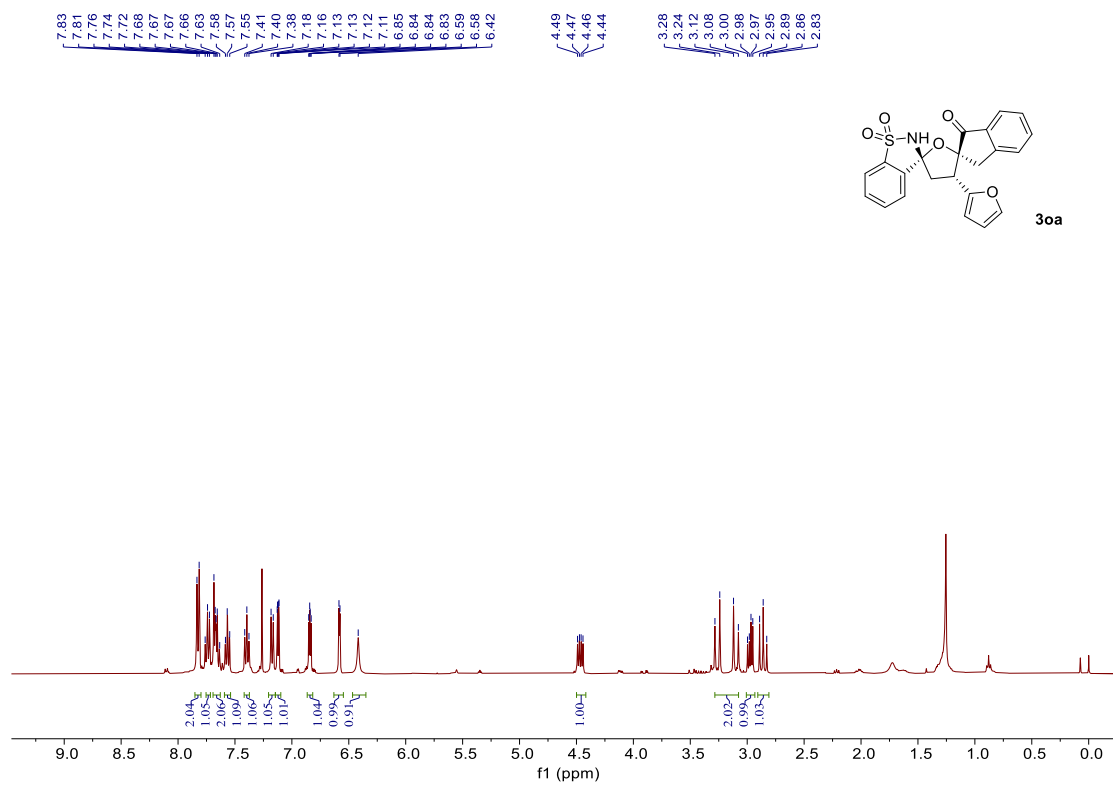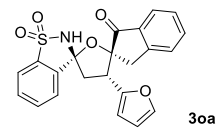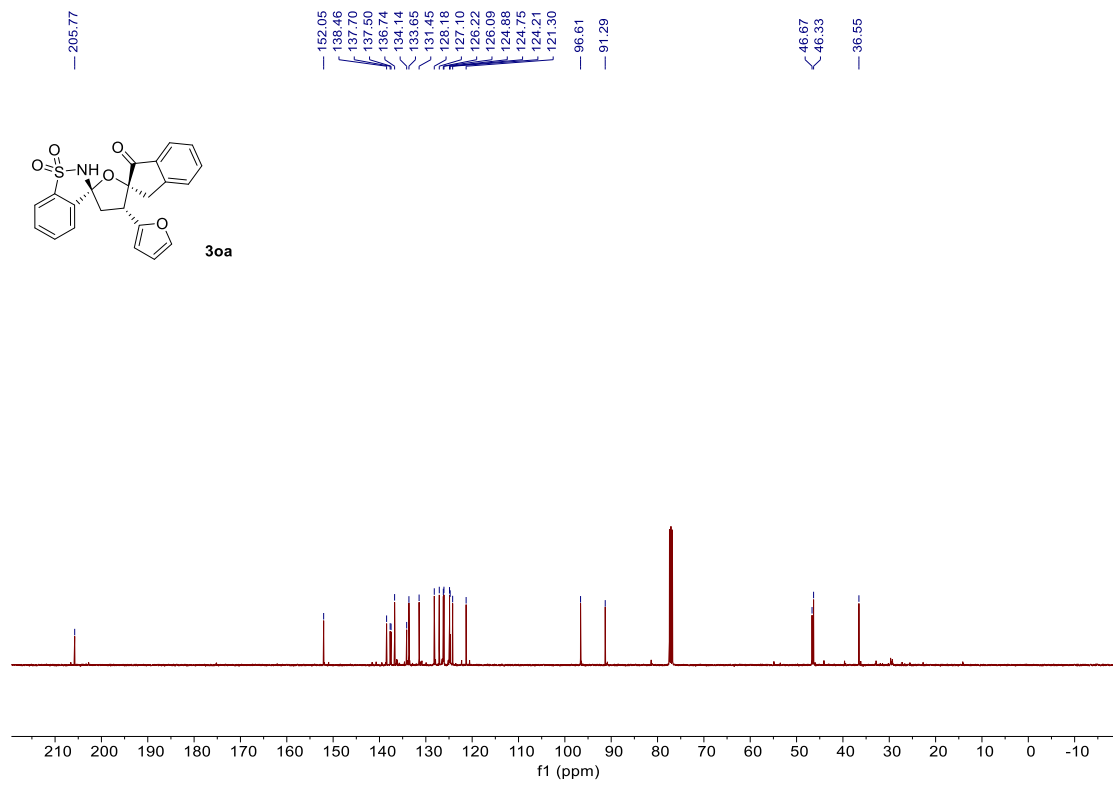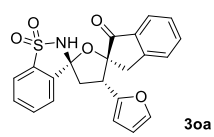

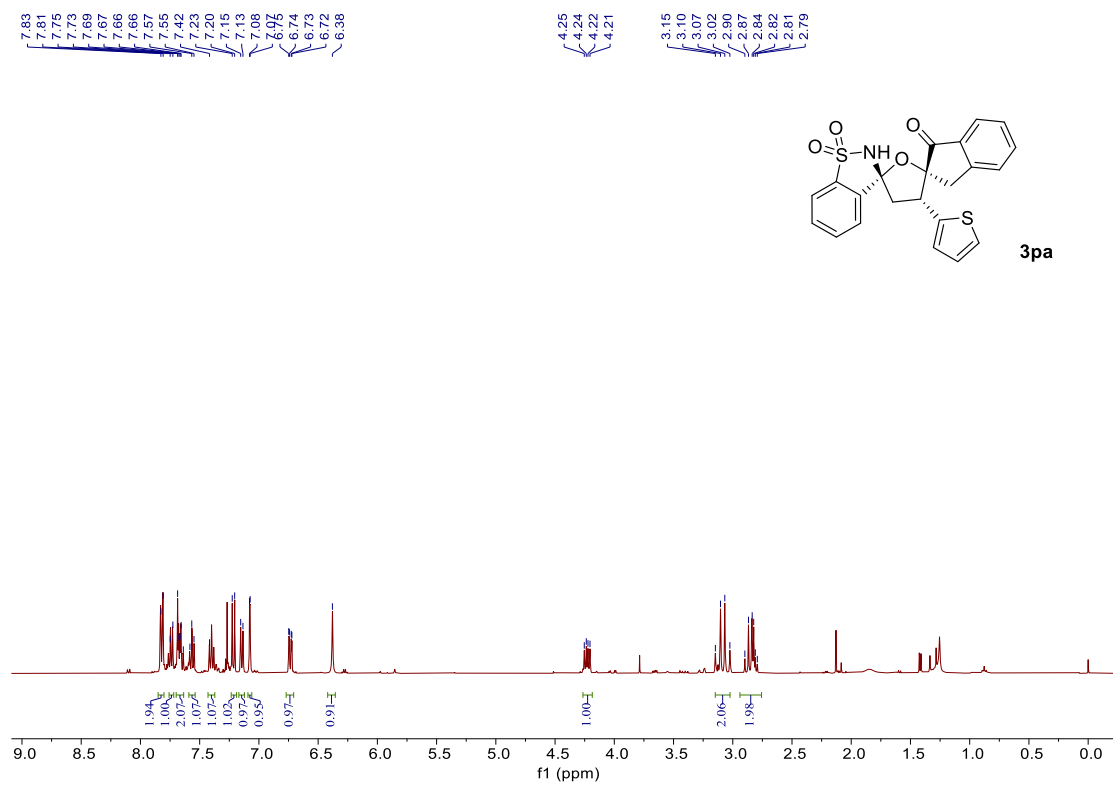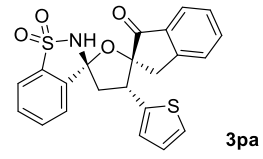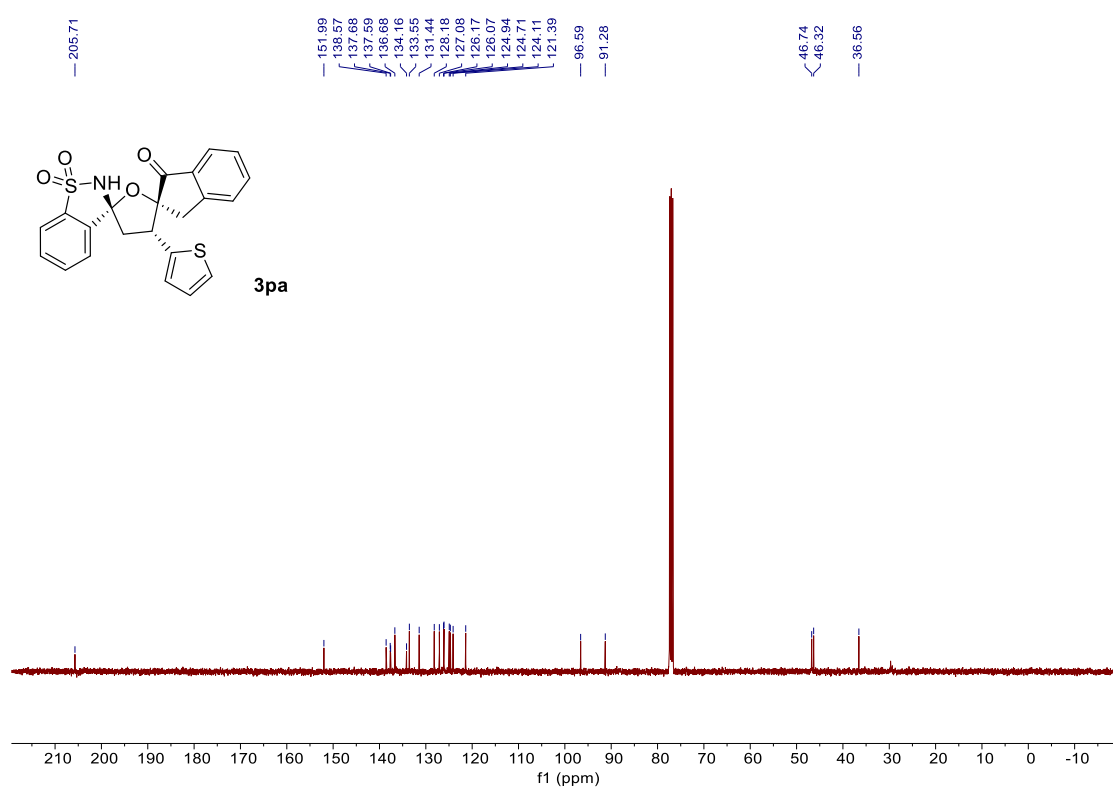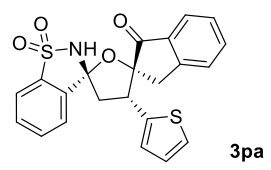

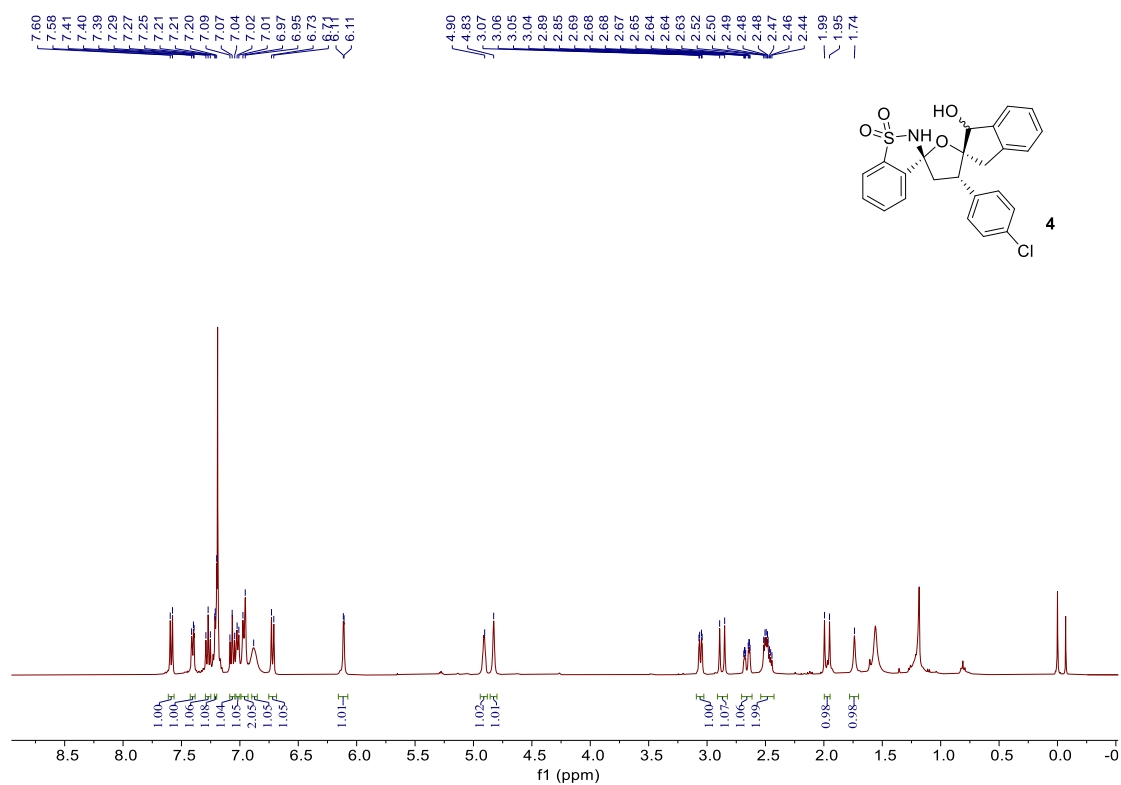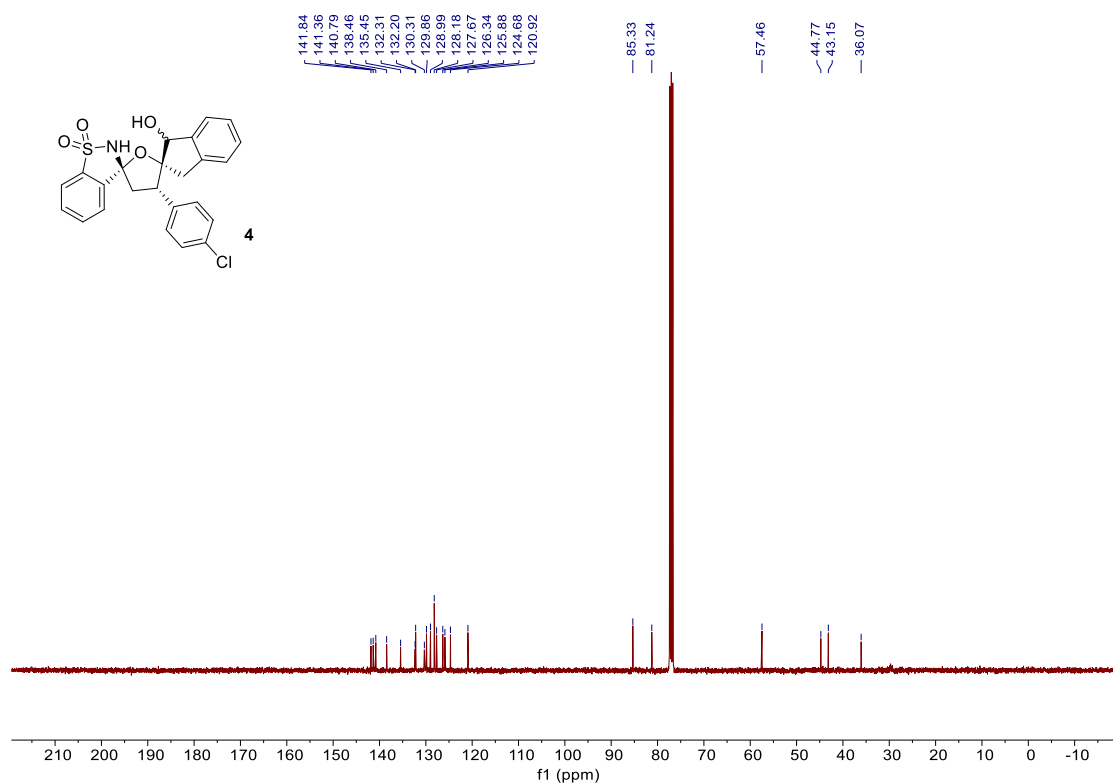

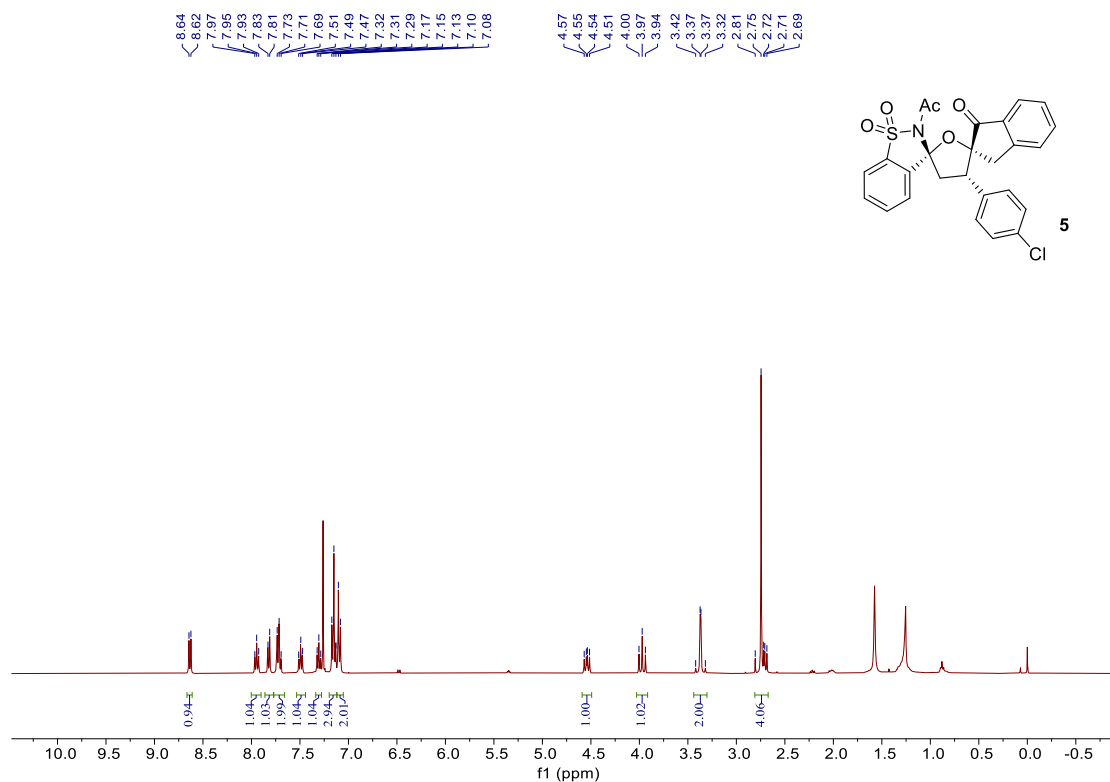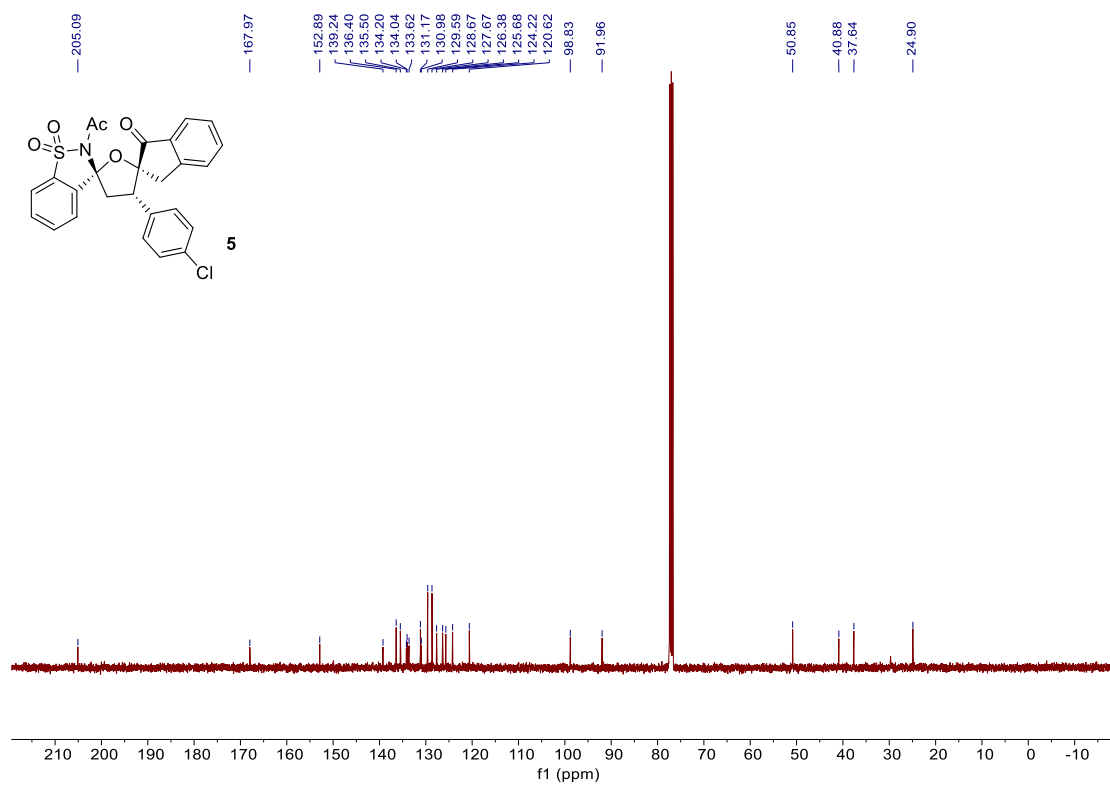

## HPLC spectra of compounds

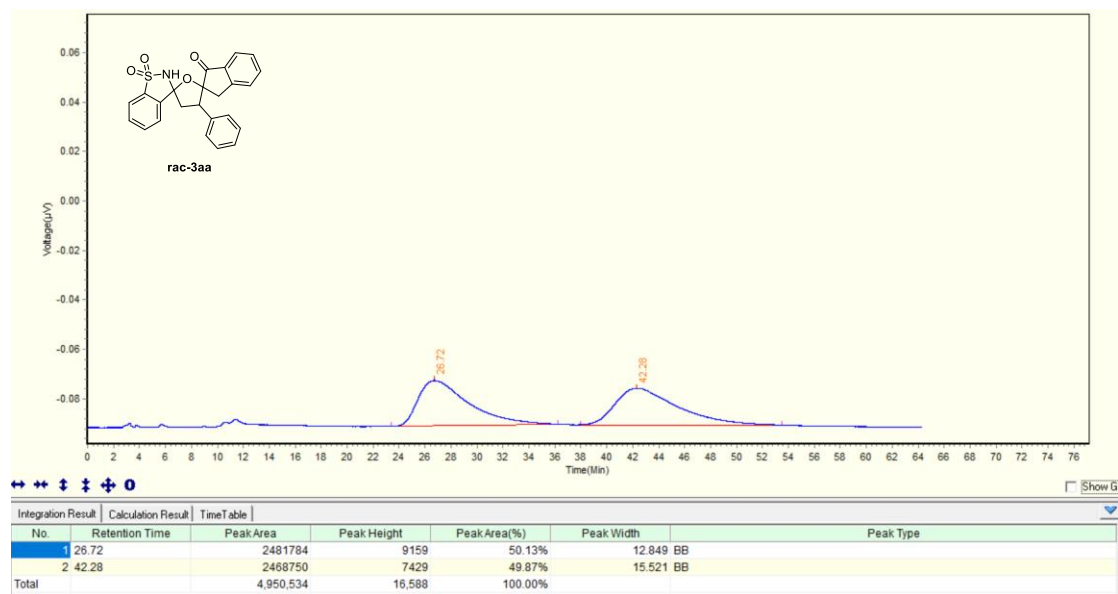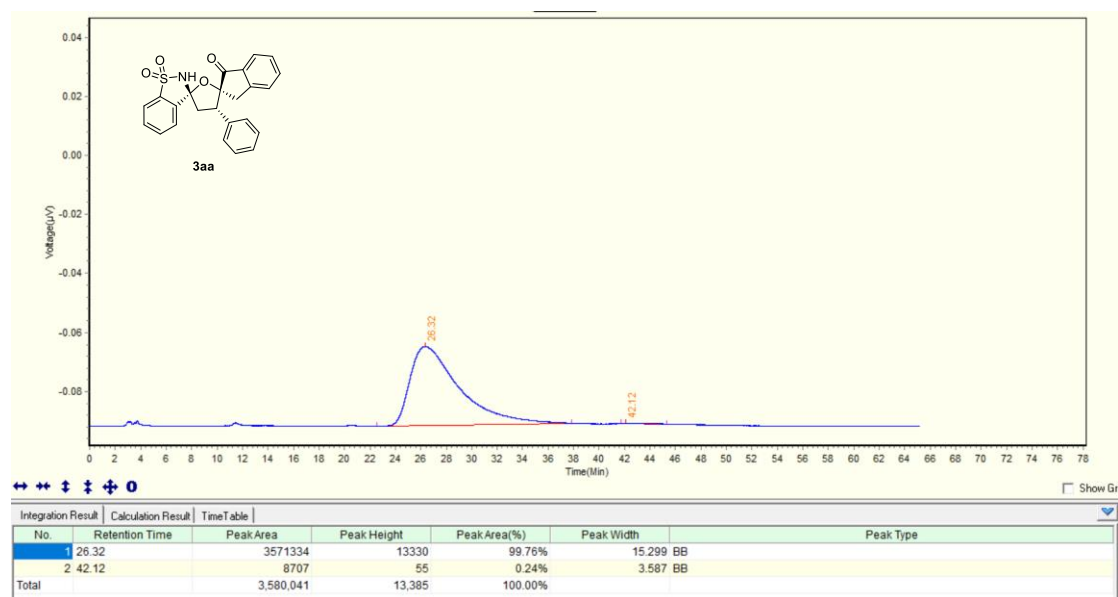

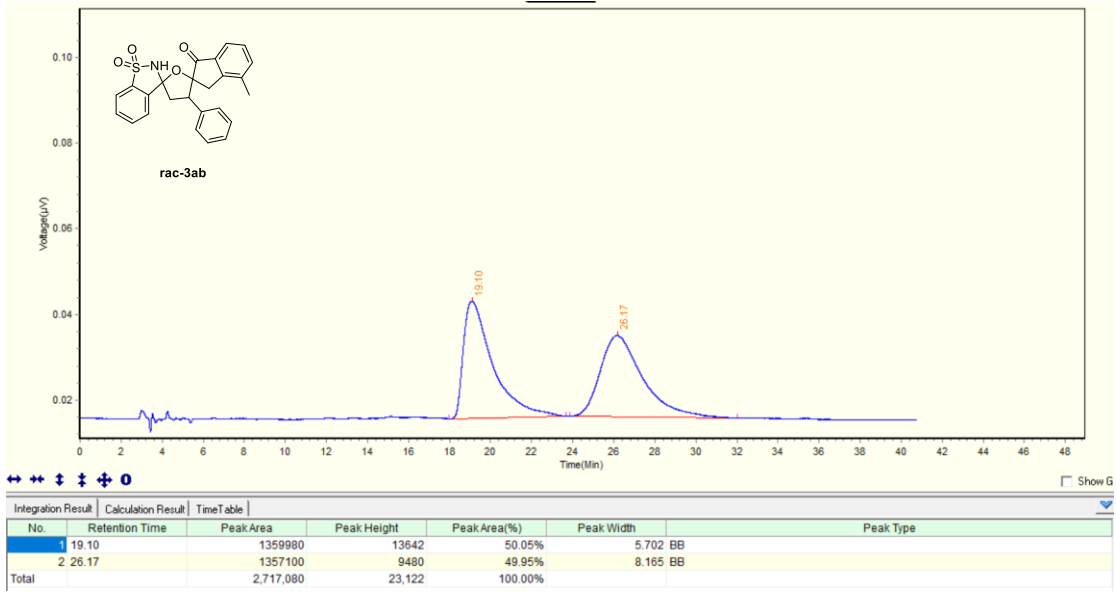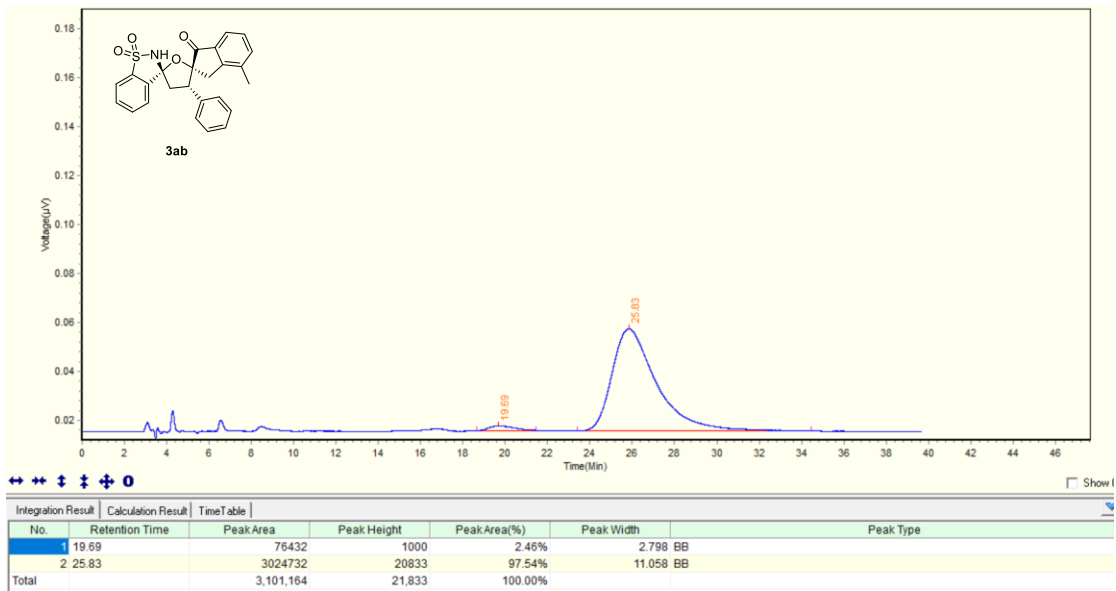

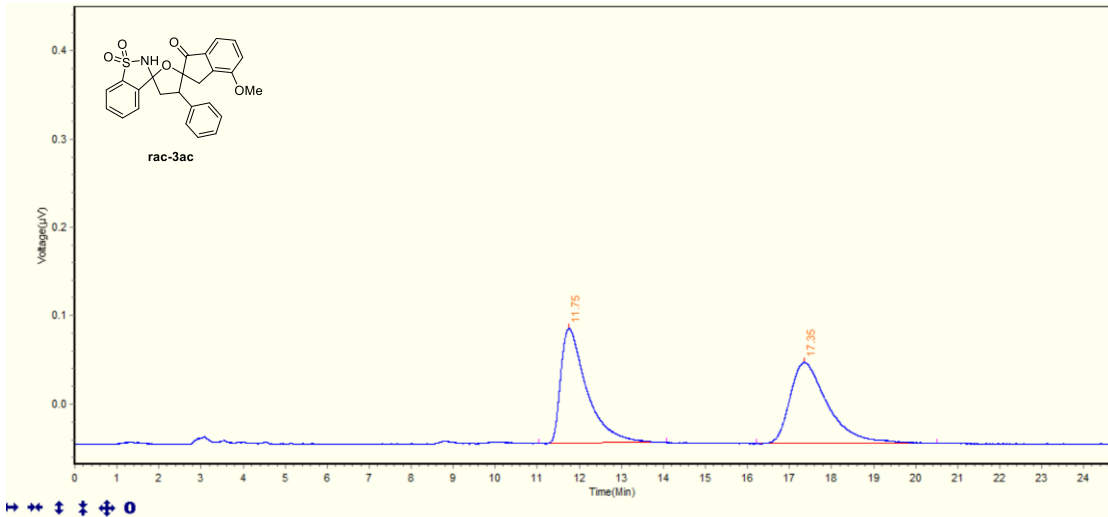

| No.   | Retention Time | Peak Area | Peak Height | Peak Area(%) | Peak Width | Peak Type |
|-------|----------------|-----------|-------------|--------------|------------|-----------|
| 1     | 11.75          | 2810121   | 64972       | 49.60%       | 3.035      | BB        |
| 2     | 17.35          | 2855213   | 45894       | 50.40%       | 4.306      | BB        |
| Total |                | 5,665,334 | 110,866     | 100.00%      |            |           |

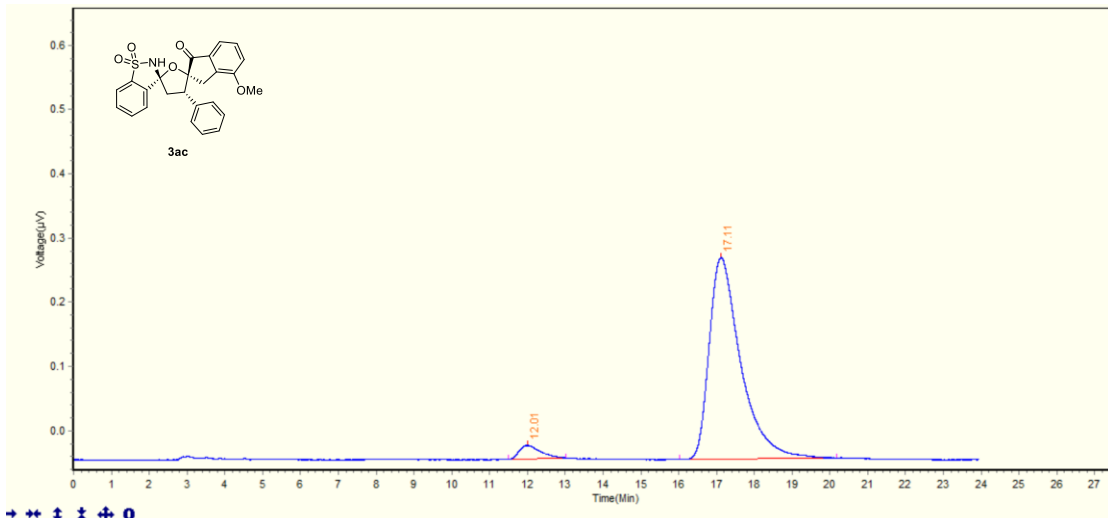

| No.   | Retention Time | Peak Area | Peak Height | Peak Area(%) | Peak Width | Peak Type |
|-------|----------------|-----------|-------------|--------------|------------|-----------|
| 1     | 12.01          | 417933    | 10567       | 4.41%        | 1.518      | BB        |
| 2     | 17.11          | 9056710   | 156714      | 95.59%       | 4.153      | BB        |
| Total |                | 9,474,643 | 167,281     | 100.00%      |            |           |



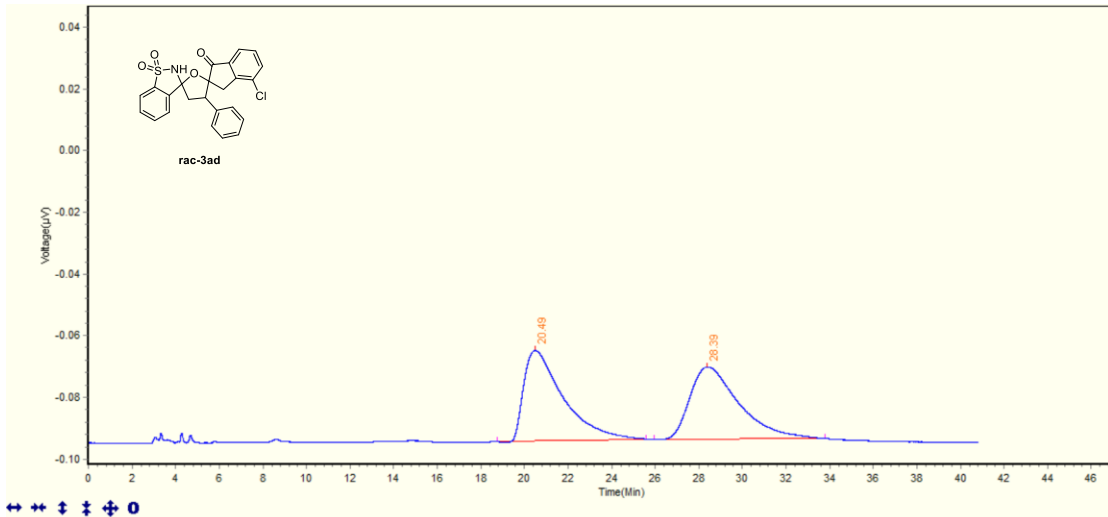

| Integration Result |                | Calculation Result |             | TimeTable    |            |           |  |
|--------------------|----------------|--------------------|-------------|--------------|------------|-----------|--|
| No.                | Retention Time | Peak Area          | Peak Height | Peak Area(%) | Peak Width | Peak Type |  |
| 1                  | 20.49          | 1827661            | 14690       | 49.87%       | 6.831      | BB        |  |
| 2                  | 28.39          | 1837142            | 11735       | 50.13%       | 7.839      | BB        |  |
| Total              |                | 3,664,803          | 26,425      | 100.00%      |            |           |  |

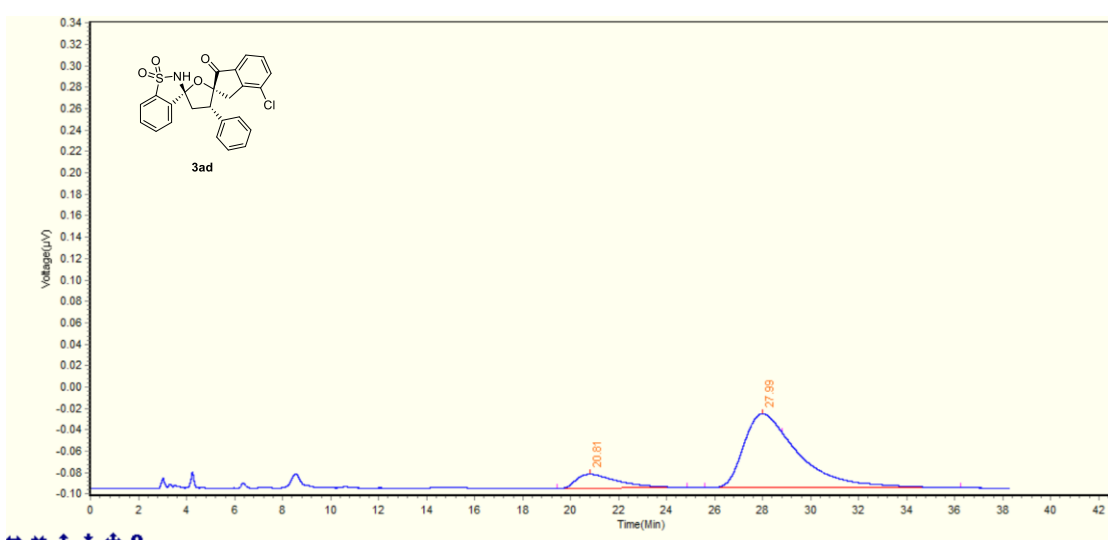

| Integration Result |                | Calculation Result |             | TimeTable    |            |           |  |
|--------------------|----------------|--------------------|-------------|--------------|------------|-----------|--|
| No.                | Retention Time | Peak Area          | Peak Height | Peak Area(%) | Peak Width | Peak Type |  |
| 1                  | 20.81          | 789744             | 6518        | 12.65%       | 5.418      | BB        |  |
| 2                  | 27.99          | 5454011            | 34586       | 87.35%       | 10.664     | SBB       |  |
| 3                  | -17.75         | 0                  | -47268      | 0.00%        | 0.0        | TBB       |  |
| Total              |                | 6,243,755          | -6,164      | 100.00%      |            |           |  |

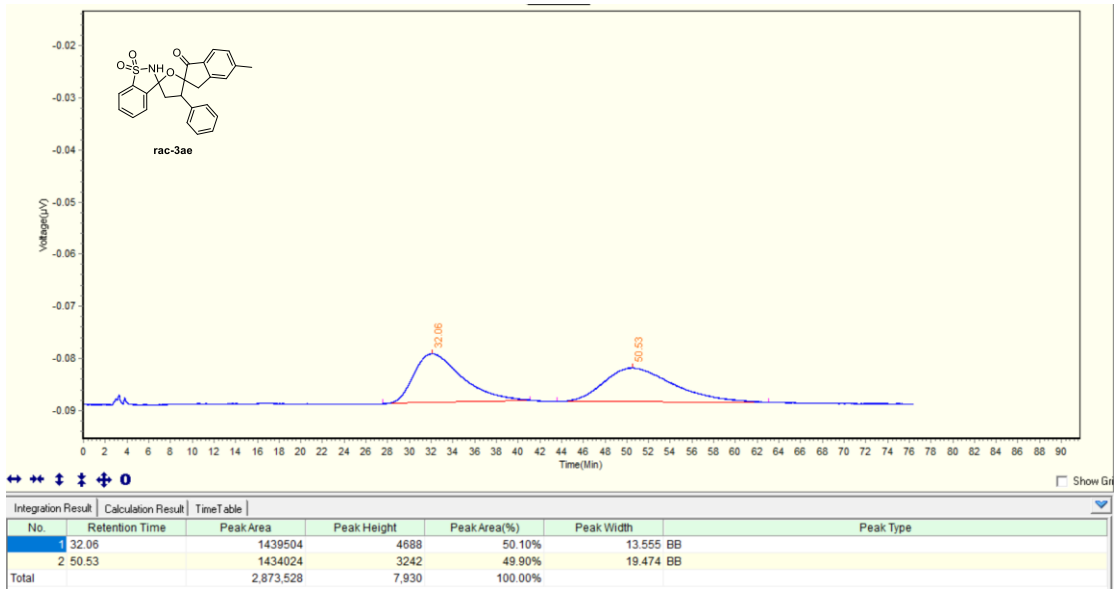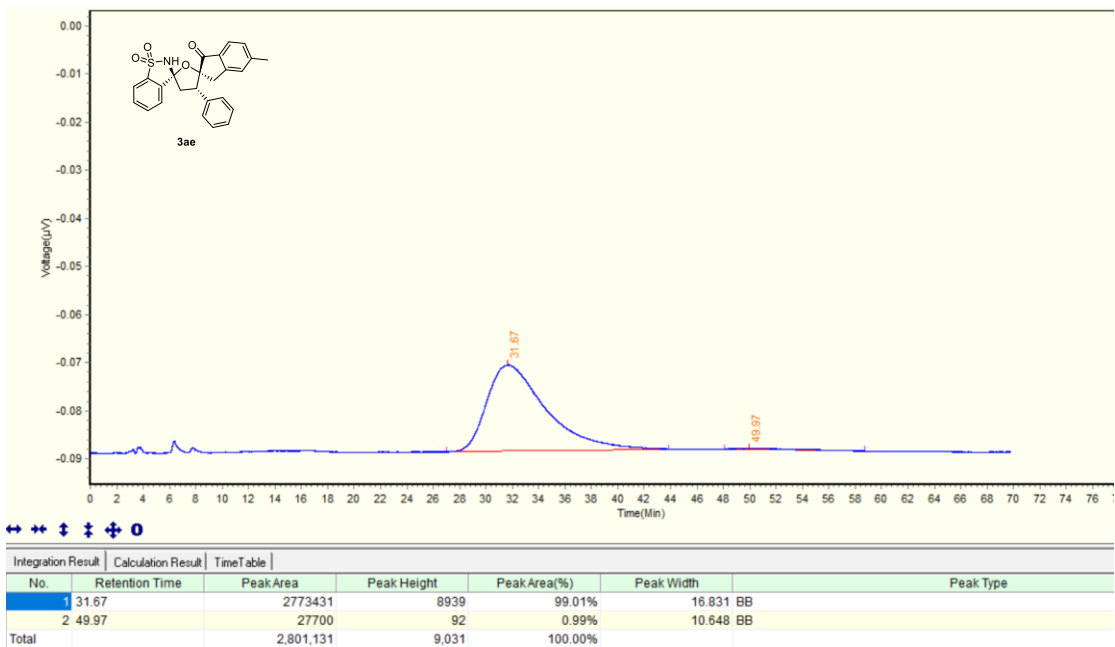

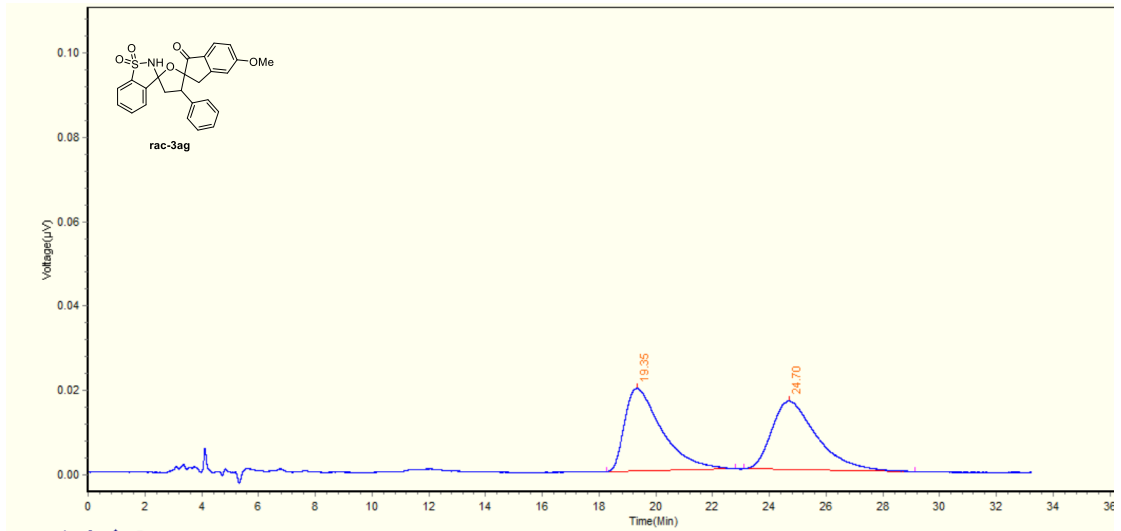

| No.   | Retention Time | Peak Area | Peak Height | Peak Area(%) | Peak Width | Peak Type |
|-------|----------------|-----------|-------------|--------------|------------|-----------|
| 1     | 19.35          | 894112    | 9792        | 50.03%       | 4.539      | BB        |
| 2     | 24.70          | 892867    | 8129        | 49.97%       | 6.028      | BB        |
| Total |                | 1,786,979 | 17,921      | 100.00%      |            |           |

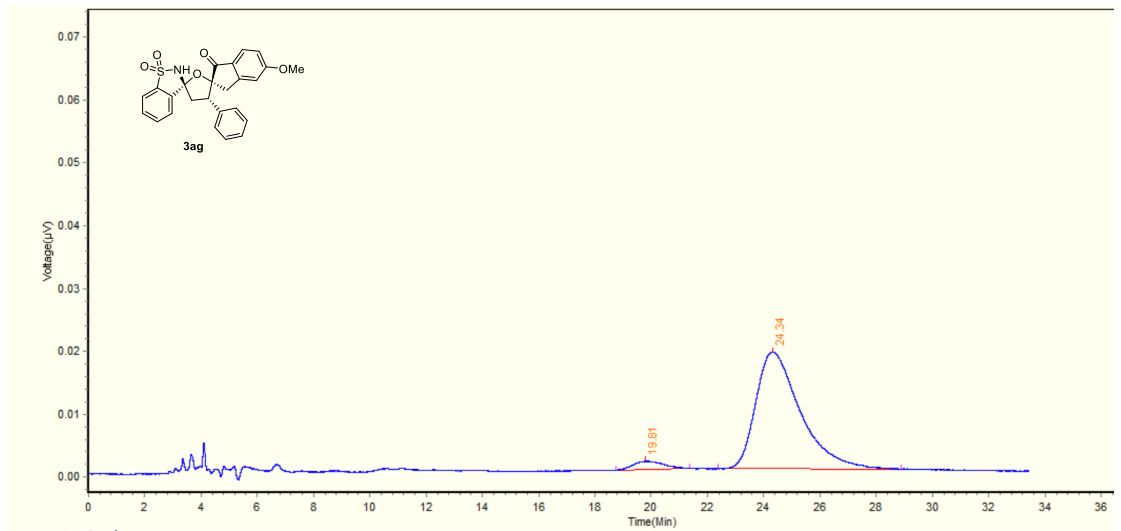

| No.   | Retention Time | Peak Area | Peak Height | Peak Area(%) | Peak Width | Peak Type |
|-------|----------------|-----------|-------------|--------------|------------|-----------|
| 1     | 19.81          | 48509     | 674         | 4.54%        | 2.619      | BB        |
| 2     | 24.34          | 1018849   | 9293        | 95.46%       | 6.512      | BB        |
| Total |                | 1,067,358 | 9,967       | 100.00%      |            |           |

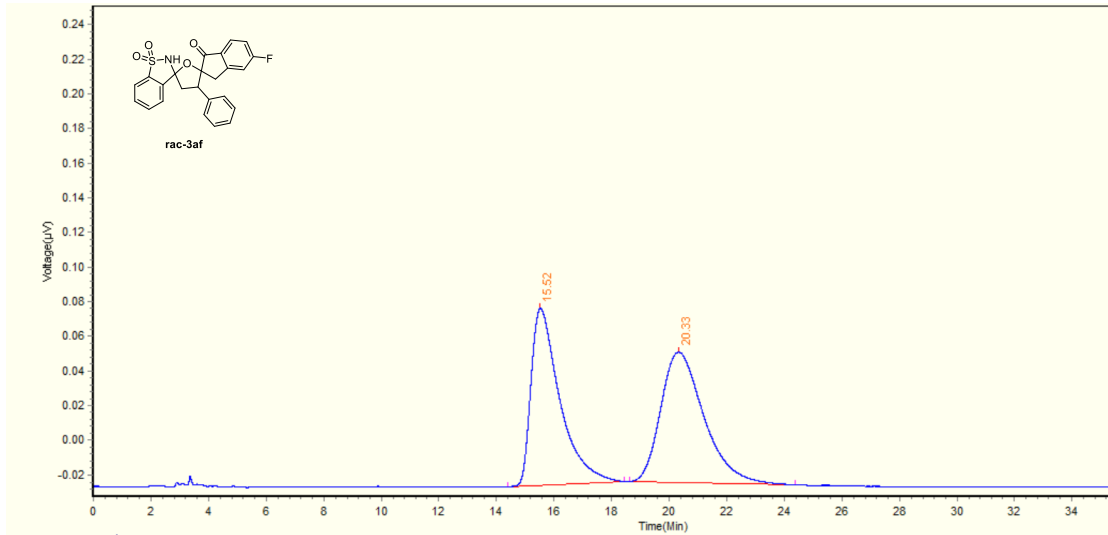

| No.   | Retention Time | Peak Area | Peak Height | Peak Area(%) | Peak Width | Peak Type |
|-------|----------------|-----------|-------------|--------------|------------|-----------|
| 1     | 15.52          | 3538099   | 51014       | 47.44%       | 4.043      | BB        |
| 2     | 20.33          | 3919978   | 37594       | 52.56%       | 5.751      | BB        |
| Total |                | 7,458,077 | 88,608      | 100.00%      |            |           |

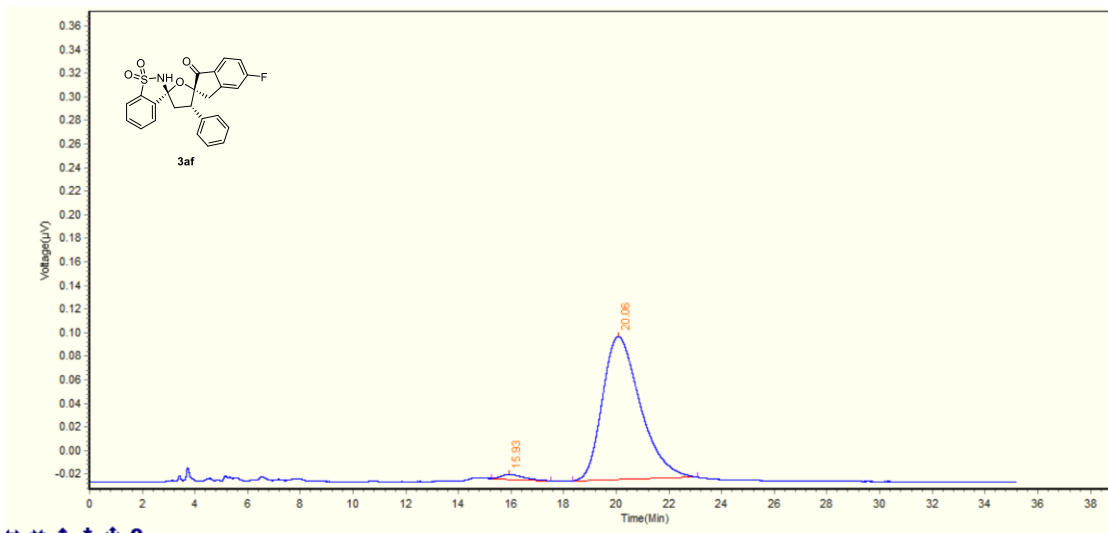

| No.   | Retention Time | Peak Area | Peak Height | Peak Area(%) | Peak Width | Peak Type |
|-------|----------------|-----------|-------------|--------------|------------|-----------|
| 1     | 15.93          | 110737    | 1959        | 1.80%        | 2.253      | BB        |
| 2     | 20.06          | 6053793   | 60623       | 98.20%       | 4.743      | BB        |
| Total |                | 6,164,530 | 62,582      | 100.00%      |            |           |

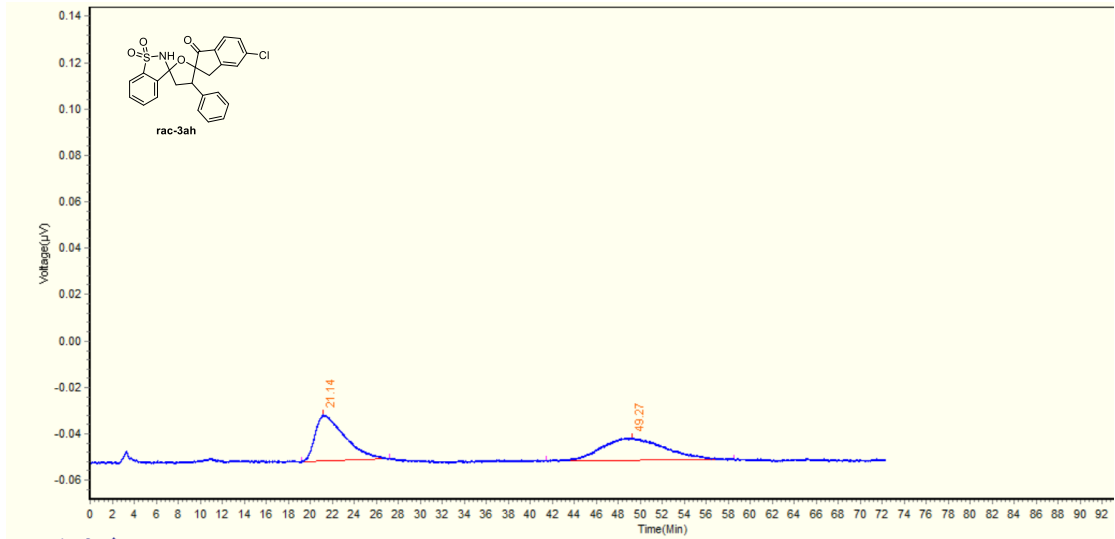

| No.   | Retention Time | Peak Area | Peak Height | Peak Area(%) | Peak Width | Peak Type |
|-------|----------------|-----------|-------------|--------------|------------|-----------|
| 1     | 21.14          | 1839948   | 9979        | 49.30%       | 7.996      | BB        |
| 2     | 49.27          | 1892232   | 4825        | 50.70%       | 17.065     | BB        |
| Total |                | 3,732,180 | 14,804      | 100.00%      |            |           |

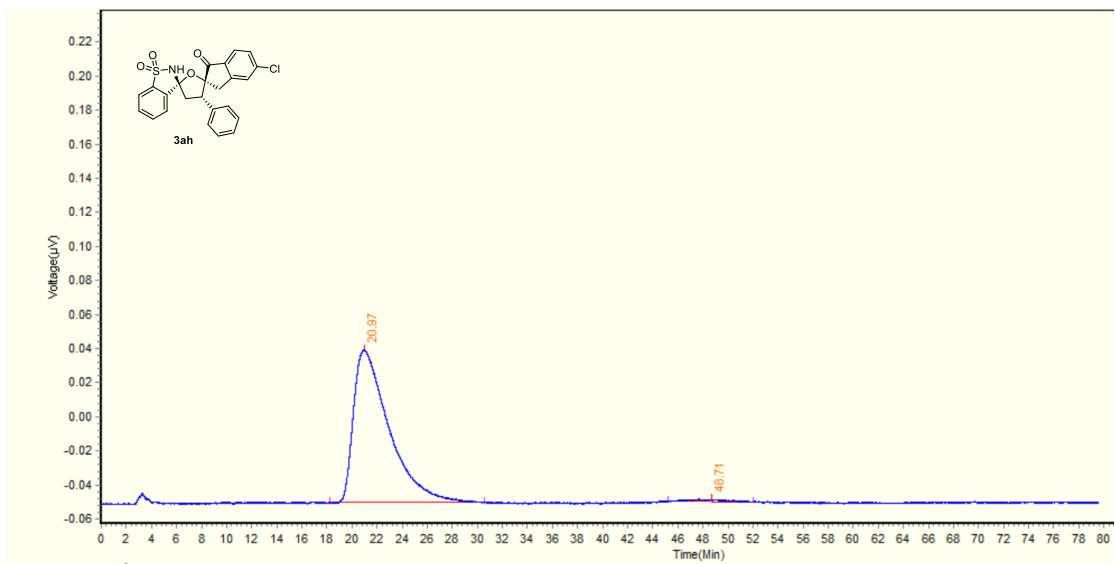

| No.   | Retention Time | Peak Area | Peak Height | Peak Area(%) | Peak Width | Peak Type |
|-------|----------------|-----------|-------------|--------------|------------|-----------|
| 1     | 20.97          | 8797059   | 44753       | 98.49%       | 12.332     | BB        |
| 2     | 48.71          | 134812    | 788         | 1.51%        | 6.791      | BB        |
| Total |                | 8,931,871 | 45,541      | 100.00%      |            |           |

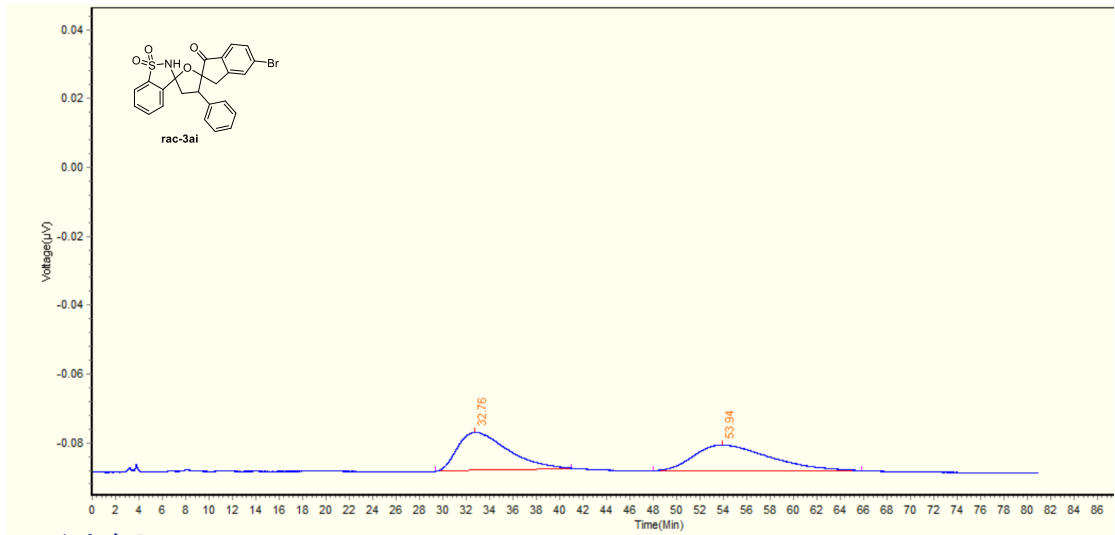

| No.   | Retention Time | PeakArea  | Peak Height | PeakArea(%) | Peak Width | Peak Type |
|-------|----------------|-----------|-------------|-------------|------------|-----------|
| 1     | 32.76          | 1647323   | 5539        | 49.45%      | 11.637     | BB        |
| 2     | 53.94          | 1683946   | 3761        | 50.55%      | 17.819     | BB        |
| Total |                | 3,331,269 | 9,300       | 100.00%     |            |           |

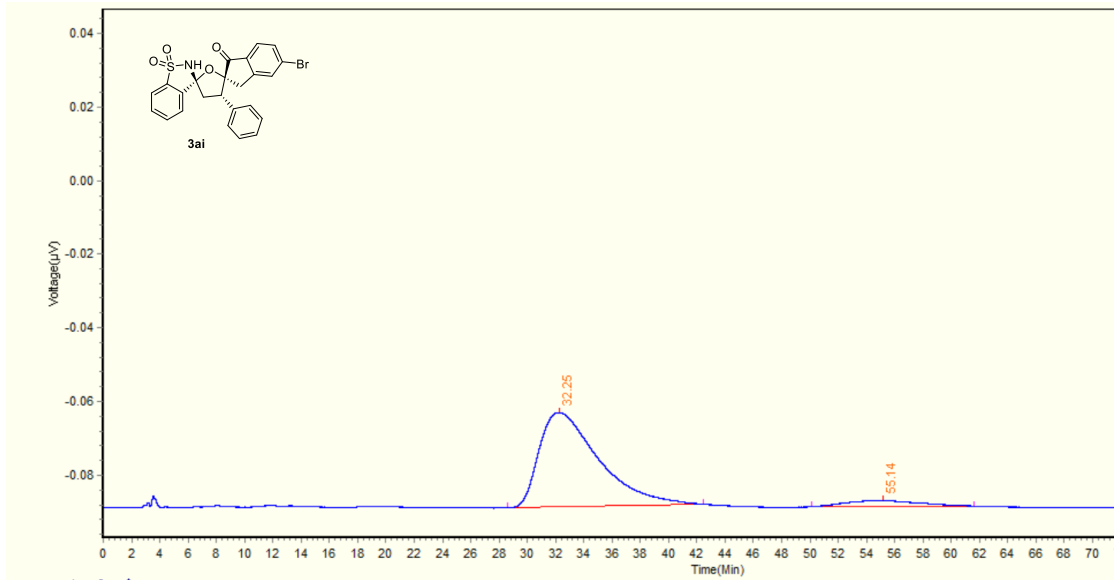

| No.   | Retention Time | PeakArea  | Peak Height | PeakArea(%) | Peak Width | Peak Ty |
|-------|----------------|-----------|-------------|-------------|------------|---------|
| 1     | 32.25          | 3752485   | 12821       | 92.87%      | 13.854     | BB      |
| 2     | 55.14          | 288285    | 786         | 7.13%       | 11.491     | BB      |
| Total |                | 4,040,770 | 13,607      | 100.00%     |            |         |

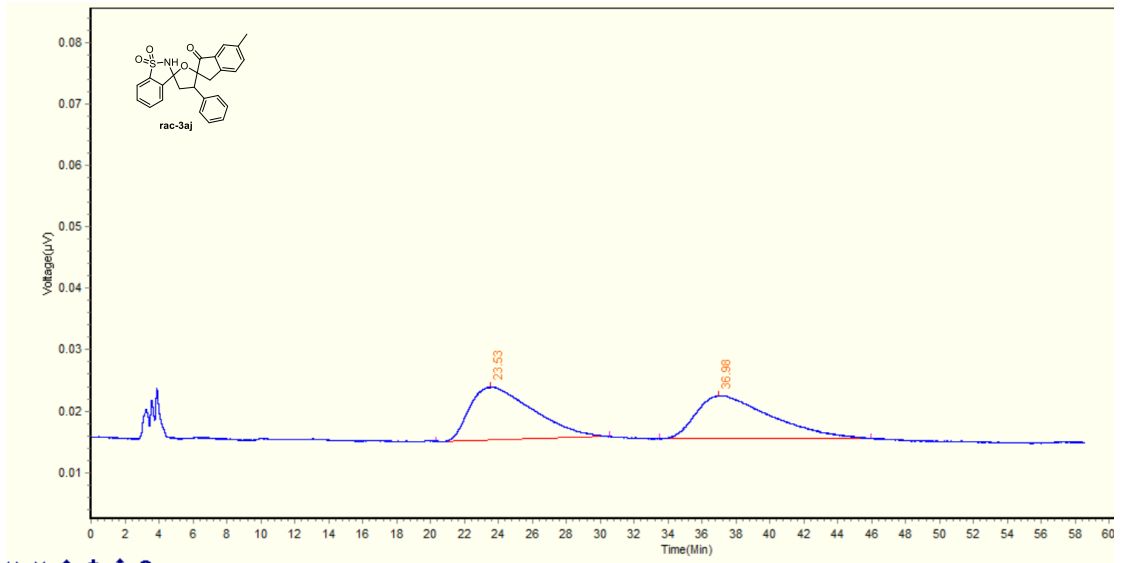

| Integration Result |                | Calculation Result |             | TimeTable   |            |           |
|--------------------|----------------|--------------------|-------------|-------------|------------|-----------|
| No.                | Retention Time | PeakArea           | Peak Height | PeakArea(%) | Peak Width | Peak Type |
| 1                  | 23.53          | 1105318            | 4296        | 50.79%      | 10.225     | BB        |
| 2                  | 36.98          | 1071009            | 3492        | 49.21%      | 12.453     | BB        |
| Total              |                | 2,176,327          | 7,788       | 100.00%     |            |           |

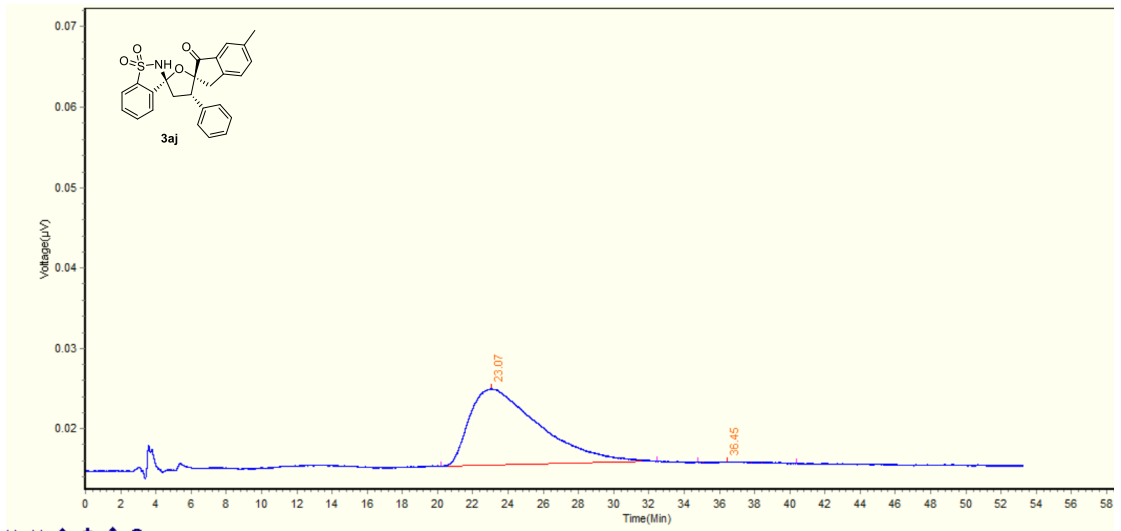

| Integration Result |                | Calculation Result |             | TimeTable   |            |           |
|--------------------|----------------|--------------------|-------------|-------------|------------|-----------|
| No.                | Retention Time | PeakArea           | Peak Height | PeakArea(%) | Peak Width | Peak Type |
| 1                  | 23.07          | 1289986            | 4714        | 99.85%      | 12.267     | BB        |
| 2                  | 36.45          | 1896               | 44          | 0.15%       | 5.598      | BB        |
| Total              |                | 1,291,882          | 4,758       | 100.00%     |            |           |

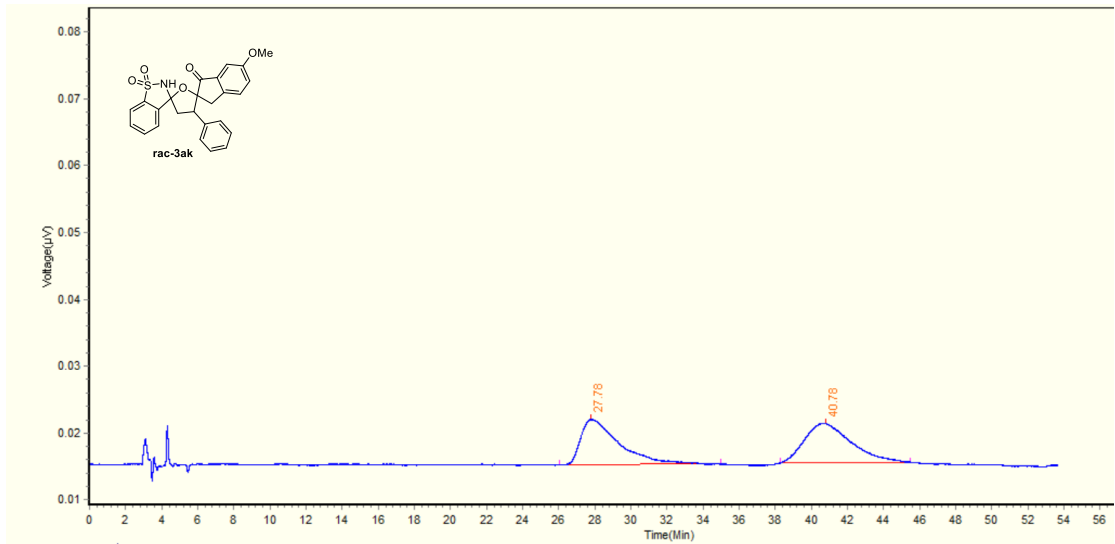

| No.   | Retention Time | Peak Area | Peak Height | Peak Area(%) | Peak Width | Peak Type |
|-------|----------------|-----------|-------------|--------------|------------|-----------|
| 1     | 27.78          | 509801    | 3420        | 49.15%       | 8.938      | BB        |
| 2     | 40.78          | 527476    | 2948        | 50.85%       | 7.199      | BB        |
| Total |                | 1,037,277 | 6,368       | 100.00%      |            |           |

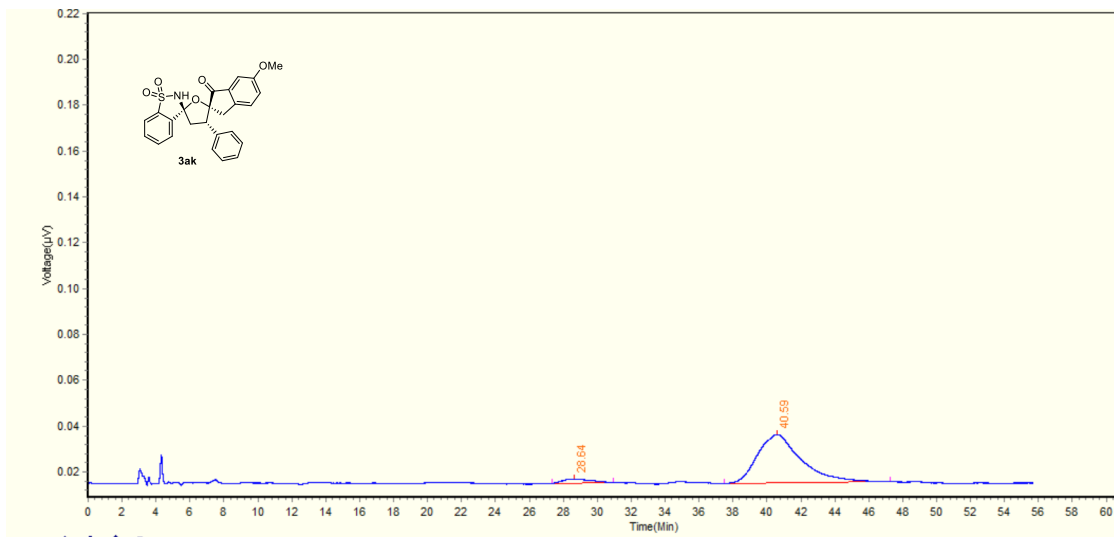

| No.   | Retention Time | Peak Area | Peak Height | Peak Area(%) | Peak Width | Peak Type |
|-------|----------------|-----------|-------------|--------------|------------|-----------|
| 1     | 28.64          | 98574     | 862         | 4.97%        | 3.612      | BB        |
| 2     | 40.59          | 1886167   | 10560       | 95.03%       | 9.776      | BB        |
| Total |                | 1,984,741 | 11,422      | 100.00%      |            |           |



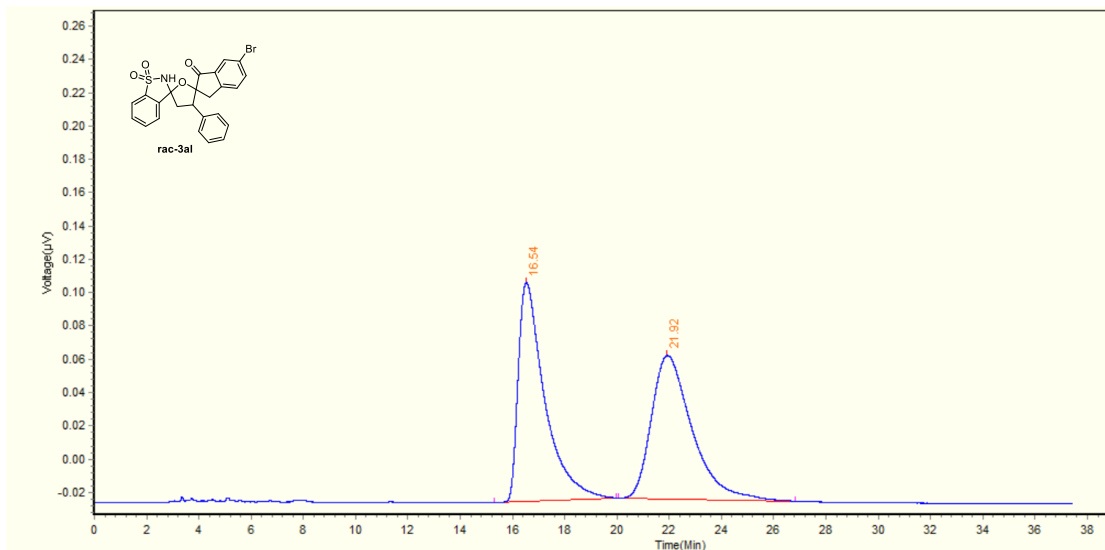

| No.          | Retention Time | Peak Area        | Peak Height    | Peak Area(%)   | Peak Width | Peak Type |
|--------------|----------------|------------------|----------------|----------------|------------|-----------|
| 1            | 16.54          | 4621138          | 65712          | 49.84%         | 4.666      | BB        |
| 2            | 21.92          | 4651586          | 43053          | 50.16%         | 6.768      | BB        |
| <b>Total</b> |                | <b>9,272,724</b> | <b>108,765</b> | <b>100.00%</b> |            |           |

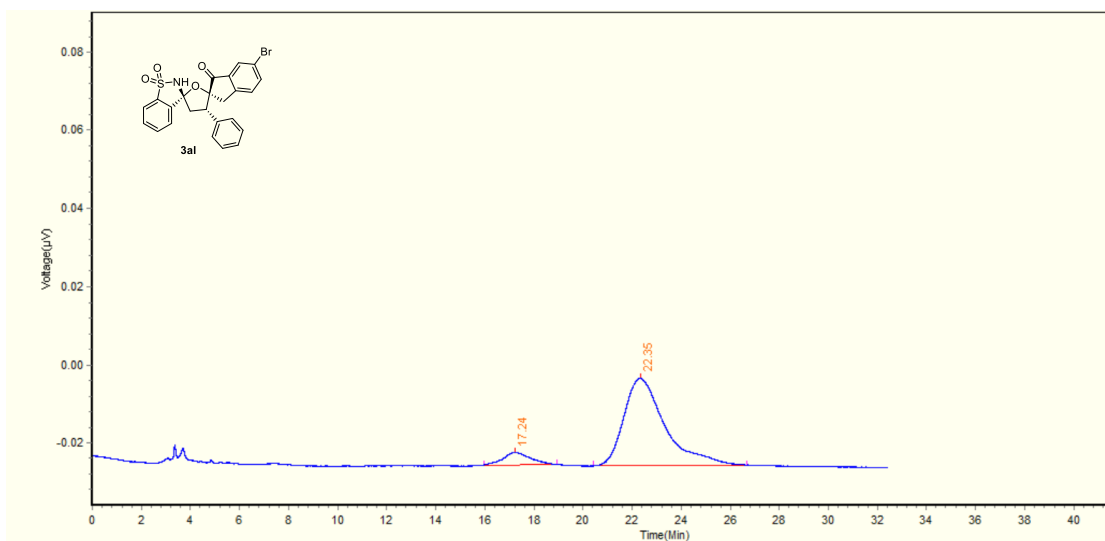

| No.          | Retention Time | Peak Area        | Peak Height   | Peak Area(%)   | Peak Width | Peak Type |
|--------------|----------------|------------------|---------------|----------------|------------|-----------|
| 1            | 17.24          | 119561           | 1551          | 8.46%          | 2.973      | BB        |
| 2            | 22.35          | 1293833          | 11148         | 91.54%         | 6.254      | BB        |
| <b>Total</b> |                | <b>1,413,394</b> | <b>12,699</b> | <b>100.00%</b> |            |           |

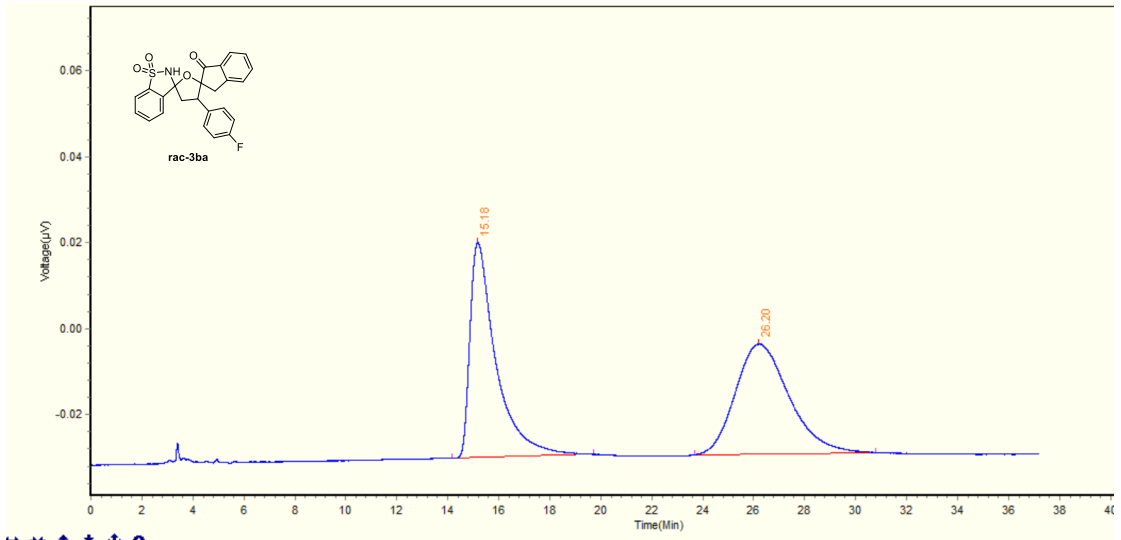

| No.   | Retention Time | PeakArea  | Peak Height | Peak Area(%) | Peak Width | Peak Type |
|-------|----------------|-----------|-------------|--------------|------------|-----------|
| 1     | 15.18          | 1766443   | 25011       | 48.55%       | 5.556      | BB        |
| 2     | 26.20          | 1872207   | 12785       | 51.45%       | 7.102      | BB        |
| Total |                | 3,638,650 | 37,796      | 100.00%      |            |           |

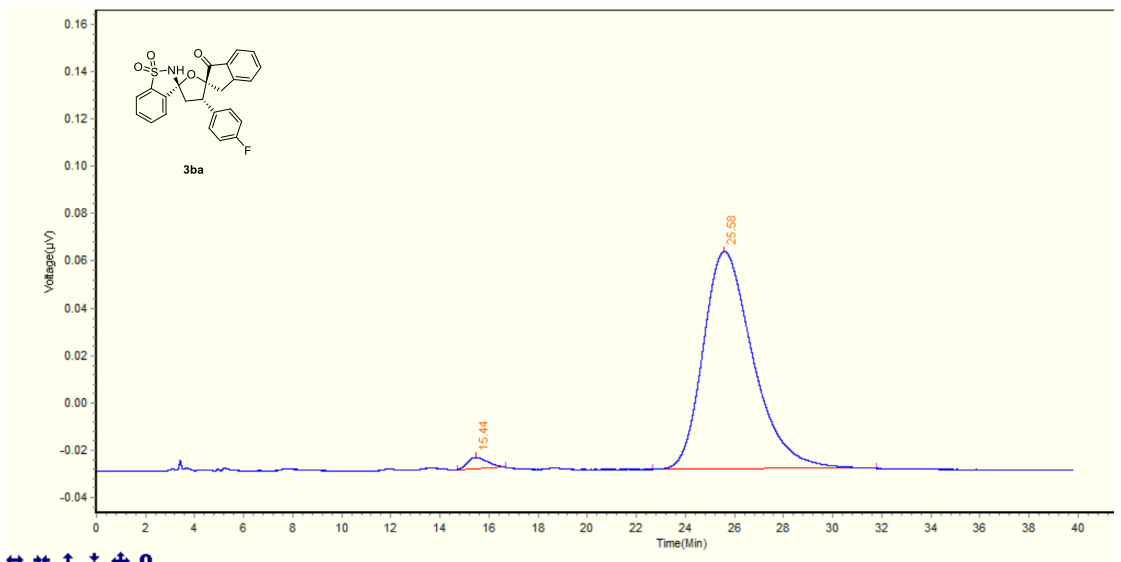

| No.   | Retention Time | PeakArea  | Peak Height | Peak Area(%) | Peak Width | Peak Type |
|-------|----------------|-----------|-------------|--------------|------------|-----------|
| 1     | 15.44          | 135822    | 2380        | 2.04%        | 1.967      | BB        |
| 2     | 25.58          | 6513219   | 46072       | 97.96%       | 9.118      | BB        |
| Total |                | 6,649,041 | 48,452      | 100.00%      |            |           |

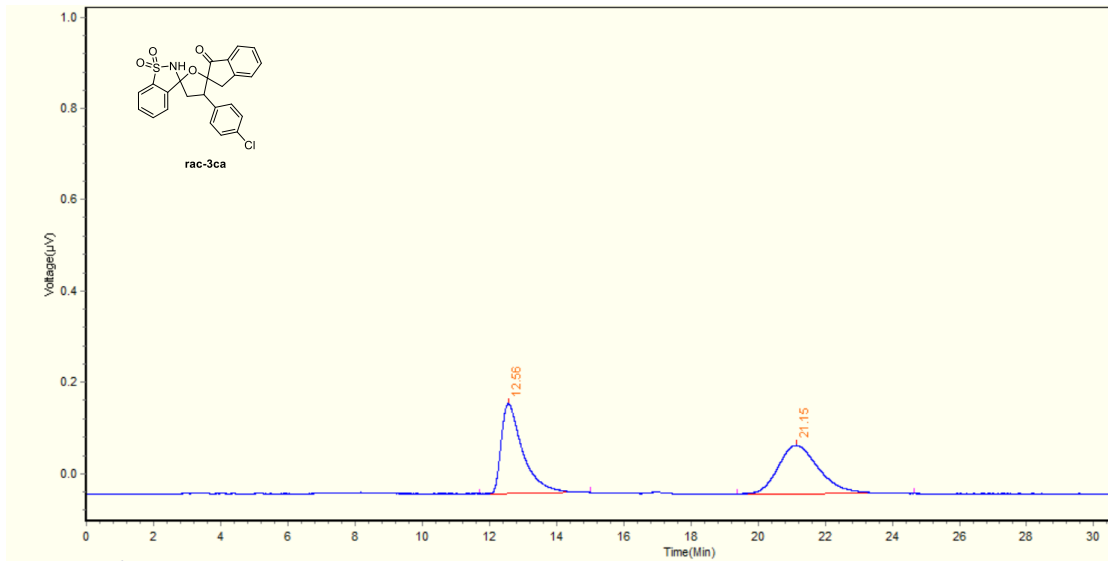

| No.   | Retention Time | Peak Area | Peak Height | Peak Area(%) | Peak Width | Peak Type |
|-------|----------------|-----------|-------------|--------------|------------|-----------|
| 1     | 12.56          | 4365877   | 98140       | 49.29%       | 3.278      | BB        |
| 2     | 21.15          | 4491501   | 53094       | 50.71%       | 5.255      | BB        |
| Total |                | 8,857,378 | 151,234     | 100.00%      |            |           |

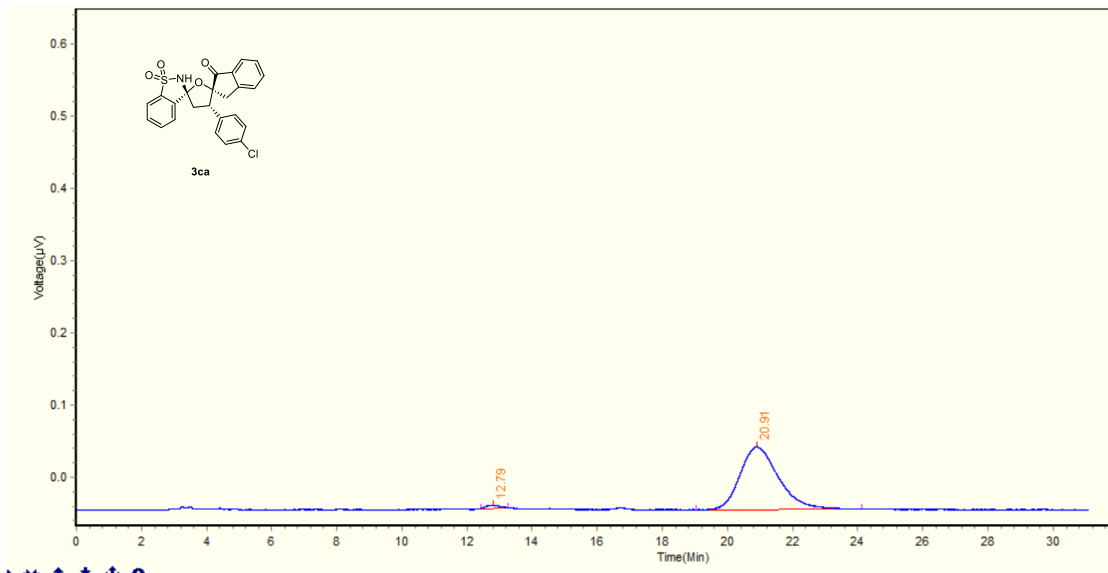

| No.   | Retention Time | Peak Area | Peak Height | Peak Area(%) | Peak Width | Peak Type |
|-------|----------------|-----------|-------------|--------------|------------|-----------|
| 1     | 12.79          | 55081     | 1981        | 1.51%        | 0.831      | BB        |
| 2     | 20.91          | 3582608   | 43352       | 98.49%       | 5.101      | BB        |
| total |                | 3,637,689 | 45,333      | 100.00%      |            |           |

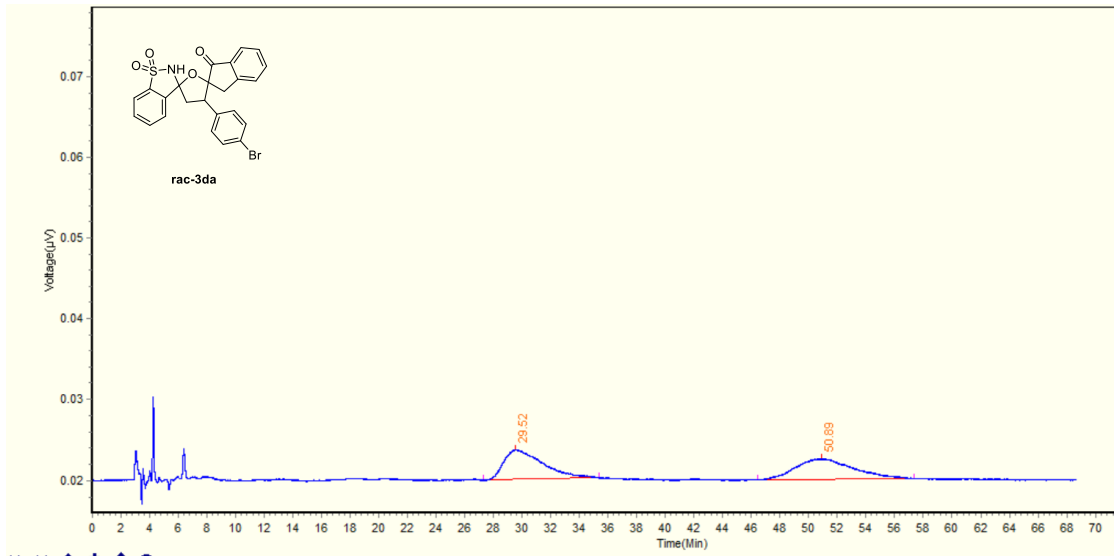

| Integration Result |                | Calculation Result |             | TimeTable    |            |           |
|--------------------|----------------|--------------------|-------------|--------------|------------|-----------|
| No.                | Retention Time | Peak Area          | Peak Height | Peak Area(%) | Peak Width | Peak Type |
| 1                  | 29.52          | 352427             | 1865        | 50.64%       | 8.072      | BB        |
| 2                  | 50.89          | 343457             | 1256        | 49.36%       | 10.917     | BB        |
| Total              |                | 695,884            | 3,121       | 100.00%      |            |           |

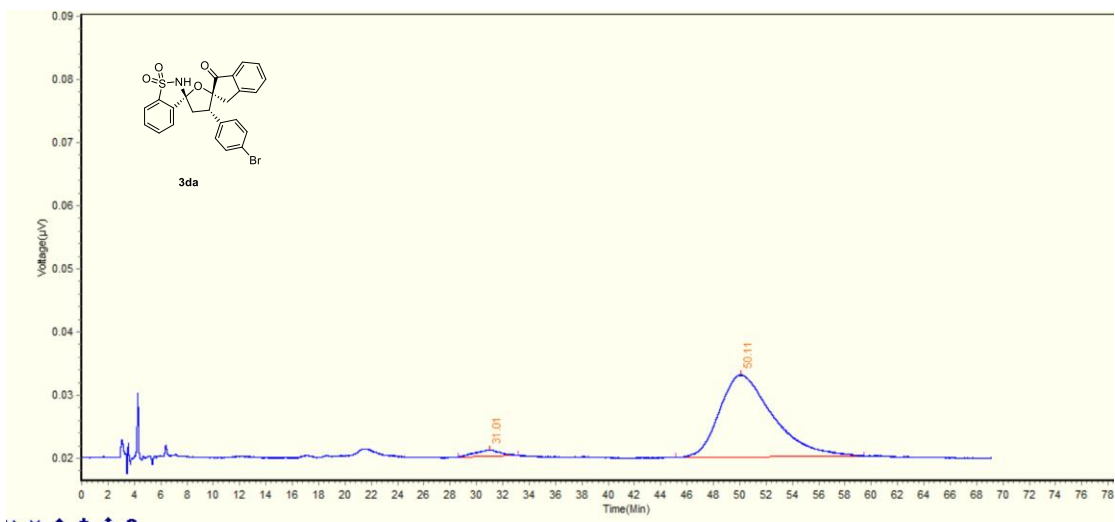

| Integration Result |                | Calculation Result |             | TimeTable    |            |           |
|--------------------|----------------|--------------------|-------------|--------------|------------|-----------|
| No.                | Retention Time | Peak Area          | Peak Height | Peak Area(%) | Peak Width | Peak Type |
| 1                  | 31.01          | 64608              | 488         | 3.44%        | 4.56       | BB        |
| 2                  | 50.11          | 1815395            | 6469        | 96.56%       | 14.299     | BB        |
| Total              |                | 1,880,003          | 6,957       | 100.00%      |            |           |

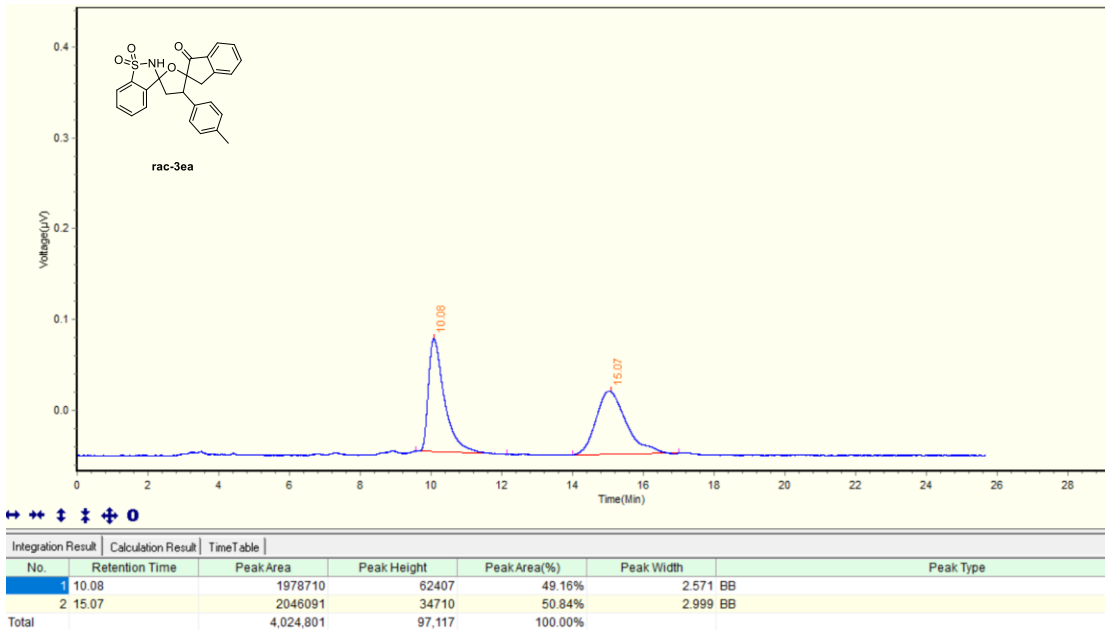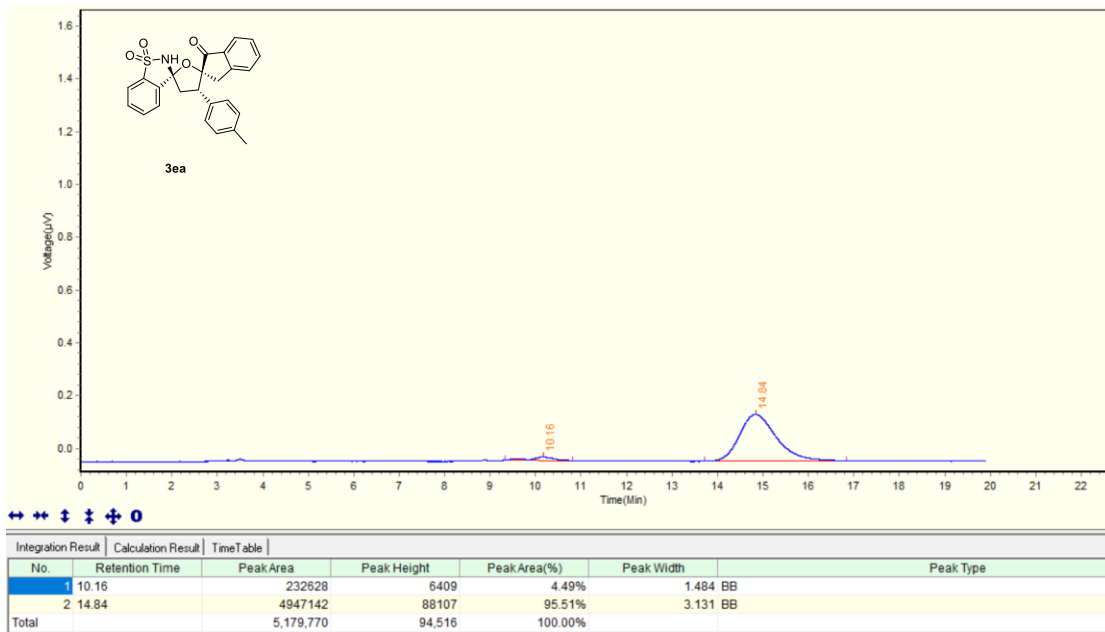

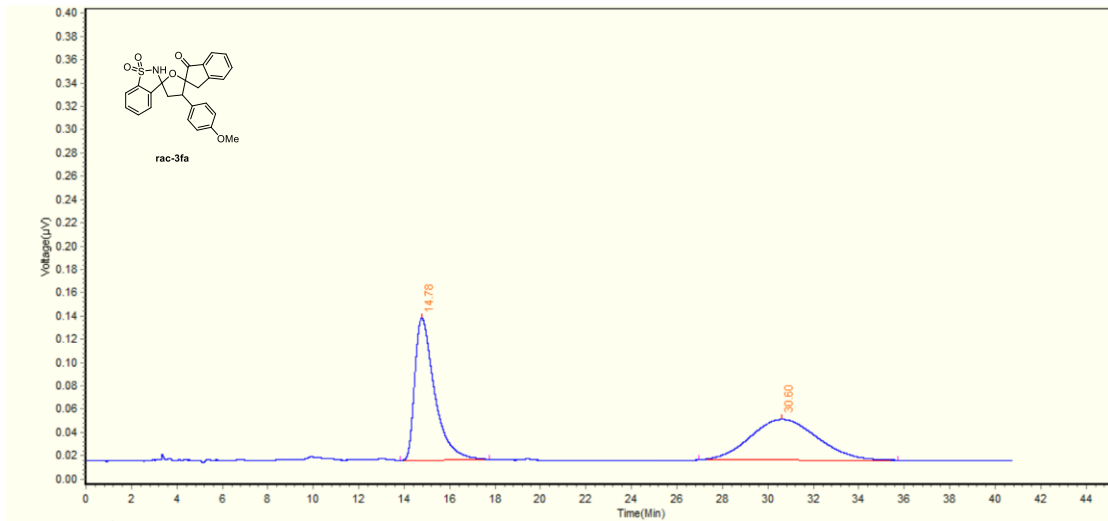

| Integration Result |                | Calculation Result |             | TimeTable    |            |           |  |
|--------------------|----------------|--------------------|-------------|--------------|------------|-----------|--|
| No.                | Retention Time | Peak Area          | Peak Height | Peak Area(%) | Peak Width | Peak Type |  |
| 1                  | 14.78          | 3680394            | 60970       | 50.65%       | 3.923      | BB        |  |
| 2                  | 30.60          | 3586113            | 17446       | 49.35%       | 8.758      | BB        |  |
| Total              |                | 7,266,507          | 78,416      | 100.00%      |            |           |  |

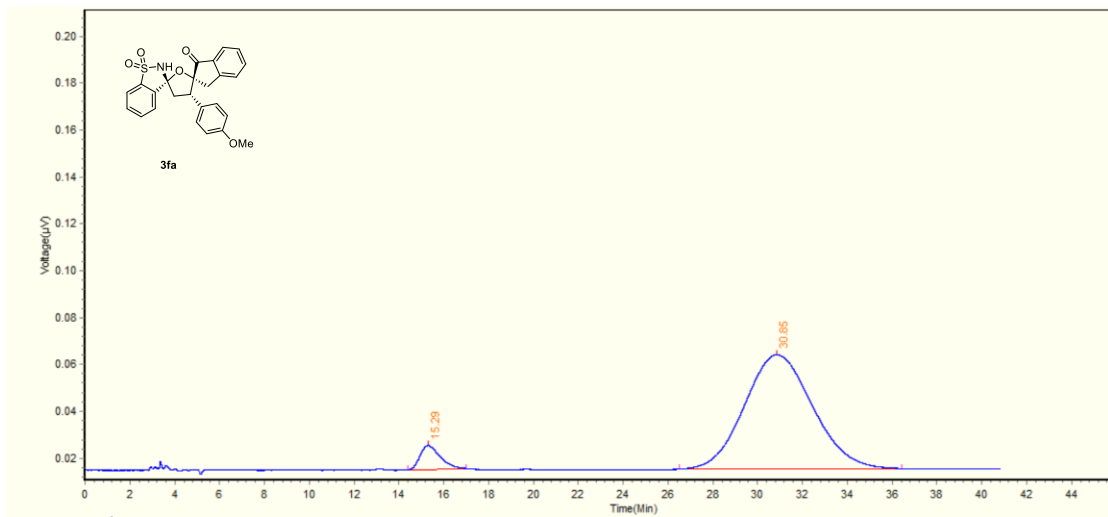

| Integration Result |                | Calculation Result |             | TimeTable    |            |           |  |
|--------------------|----------------|--------------------|-------------|--------------|------------|-----------|--|
| No.                | Retention Time | Peak Area          | Peak Height | Peak Area(%) | Peak Width | Peak Type |  |
| 1                  | 15.29          | 314926             | 5090        | 5.77%        | 2.605      | BB        |  |
| 2                  | 30.85          | 5144975            | 24325       | 94.23%       | 9.919      | BB        |  |
| Total              |                | 5,459,901          | 29,415      | 100.00%      |            |           |  |

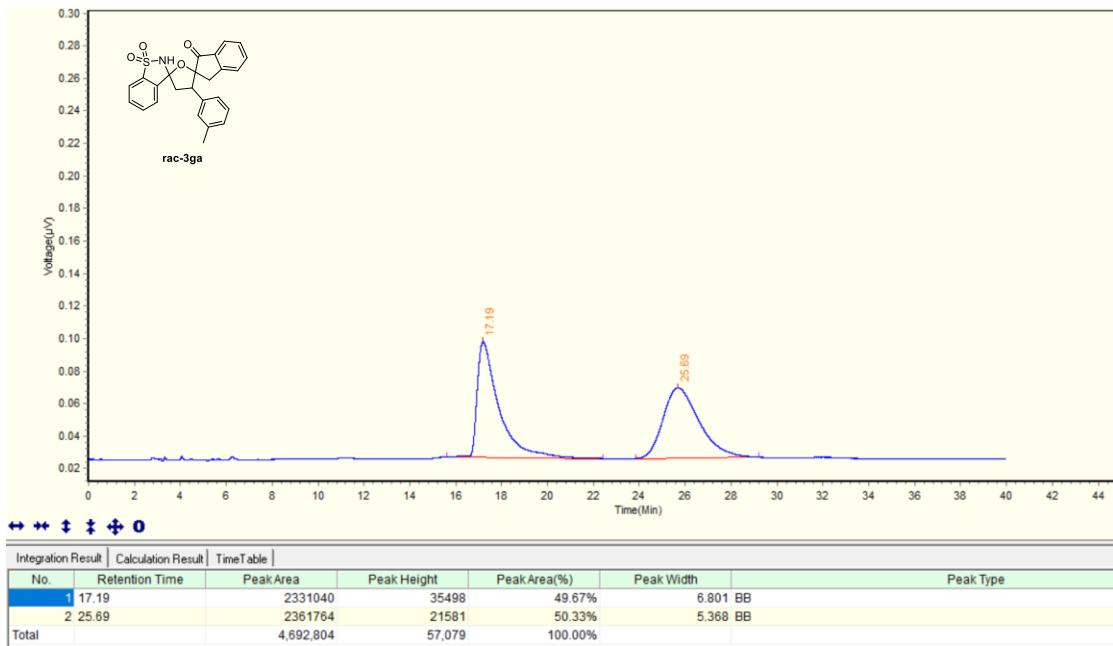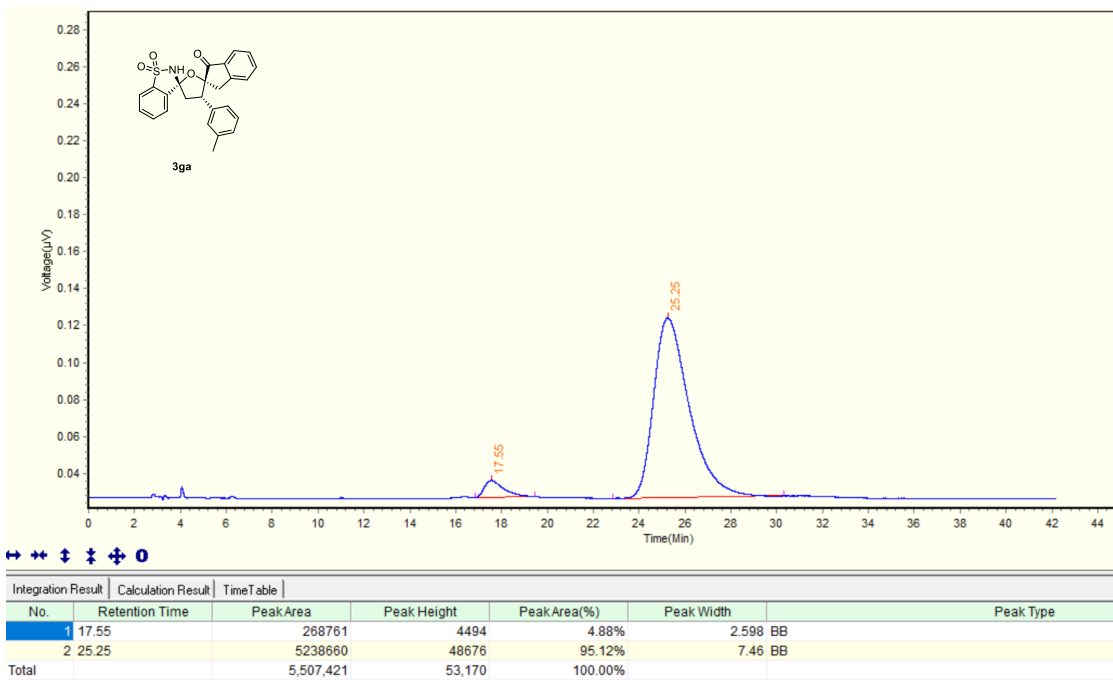

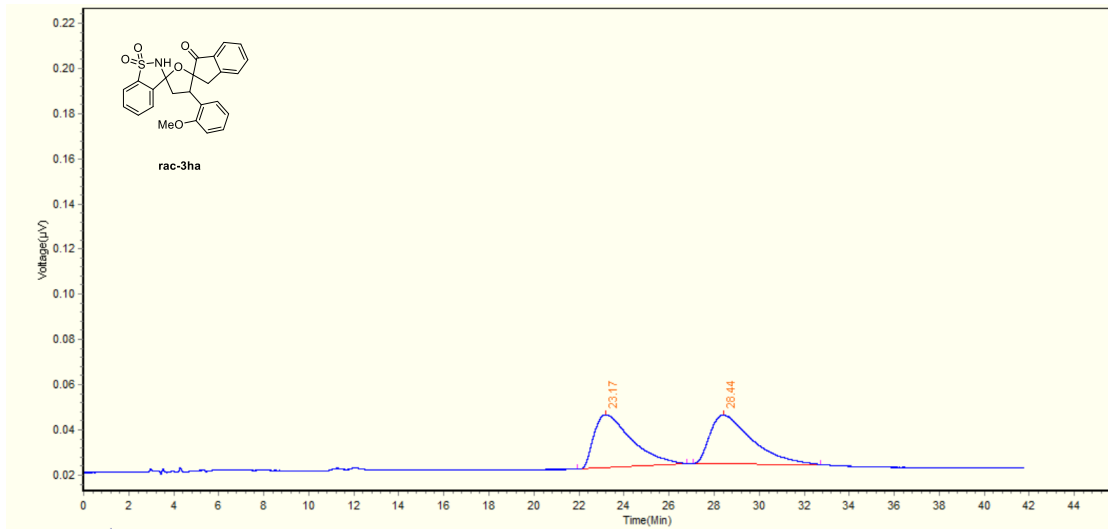

| No.   | Retention Time | Peak Area | Peak Height | Peak Area(%) | Peak Width | Peak Type |
|-------|----------------|-----------|-------------|--------------|------------|-----------|
| 1     | 23.17          | 1360637   | 11743       | 49.41%       | 4.863      | BB        |
| 2     | 28.44          | 1393121   | 10804       | 50.59%       | 5.657      | BB        |
| Total |                | 2,753,758 | 22,547      | 100.00%      |            |           |

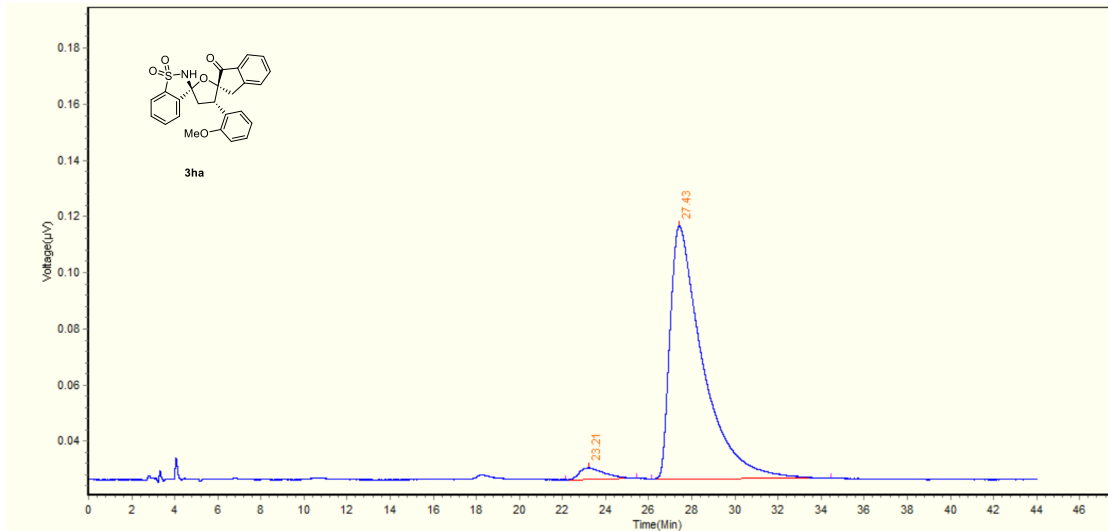

| No.   | Retention Time | Peak Area | Peak Height | Peak Area(%) | Peak Width | Peak Type |
|-------|----------------|-----------|-------------|--------------|------------|-----------|
| 1     | 23.21          | 165204    | 2045        | 3.38%        | 3.303      | BB        |
| 2     | 27.43          | 4727783   | 45104       | 96.62%       | 8.33       | BB        |
| Total |                | 4,892,987 | 47,149      | 100.00%      |            |           |



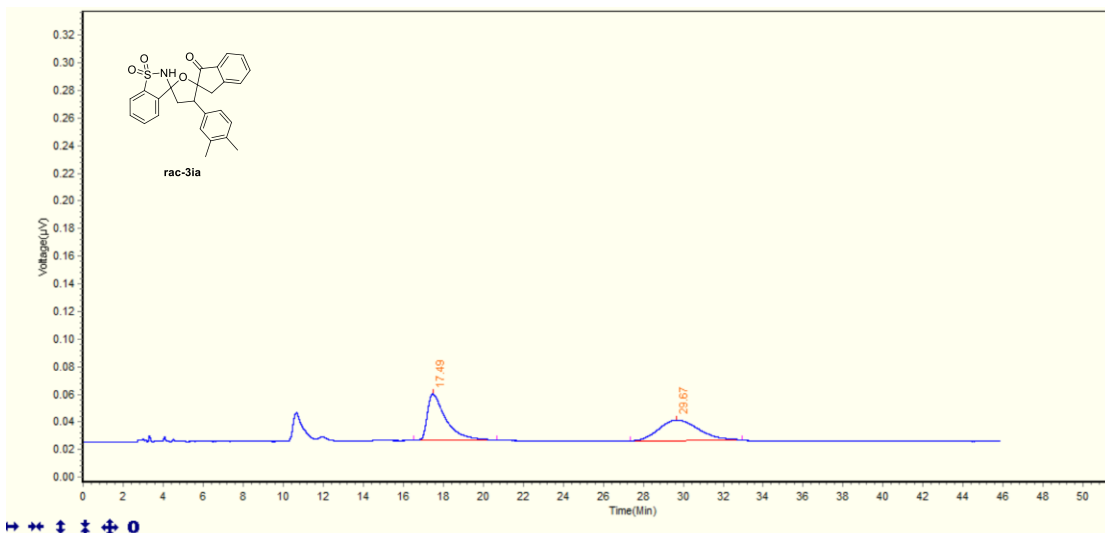

| No.   | Retention Time | Peak Area | Peak Height | Peak Area(%) | Peak Width | Peak Type |
|-------|----------------|-----------|-------------|--------------|------------|-----------|
| 1     | 17.49          | 1048880   | 16560       | 50.38%       | 4.157      | BB        |
| 2     | 29.67          | 1033081   | 7453        | 49.62%       | 5.594      | BB        |
| Total |                | 2,081,961 | 24,013      | 100.00%      |            |           |

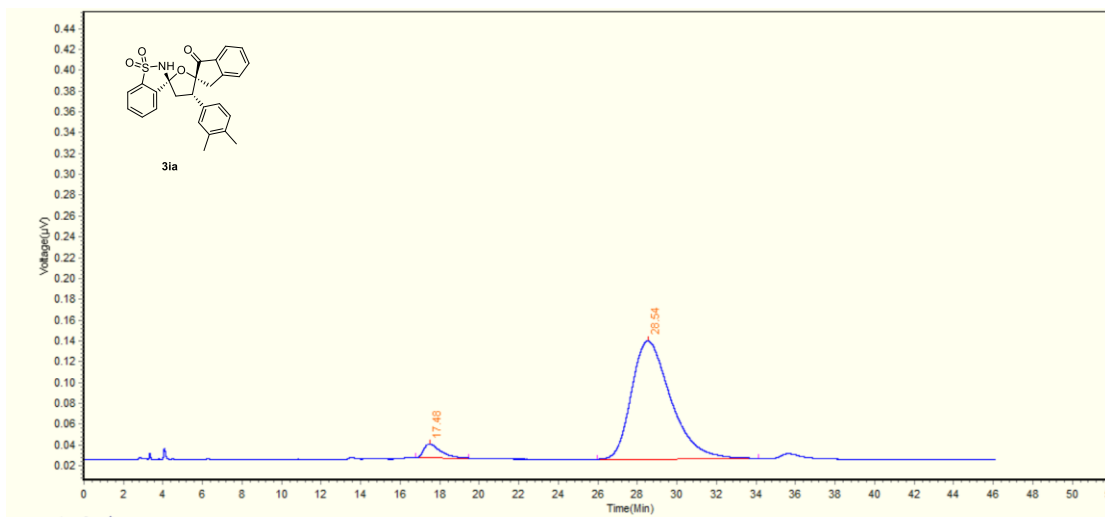

| No.   | Retention Time | Peak Area | Peak Height | Peak Area(%) | Peak Width | Peak Type |
|-------|----------------|-----------|-------------|--------------|------------|-----------|
| 1     | 17.48          | 388684    | 6649        | 4.74%        | 2.684      | BB        |
| 2     | 28.54          | 7814416   | 56518       | 95.26%       | 8.157      | BB        |
| Total |                | 8,203,100 | 63,167      | 100.00%      |            |           |

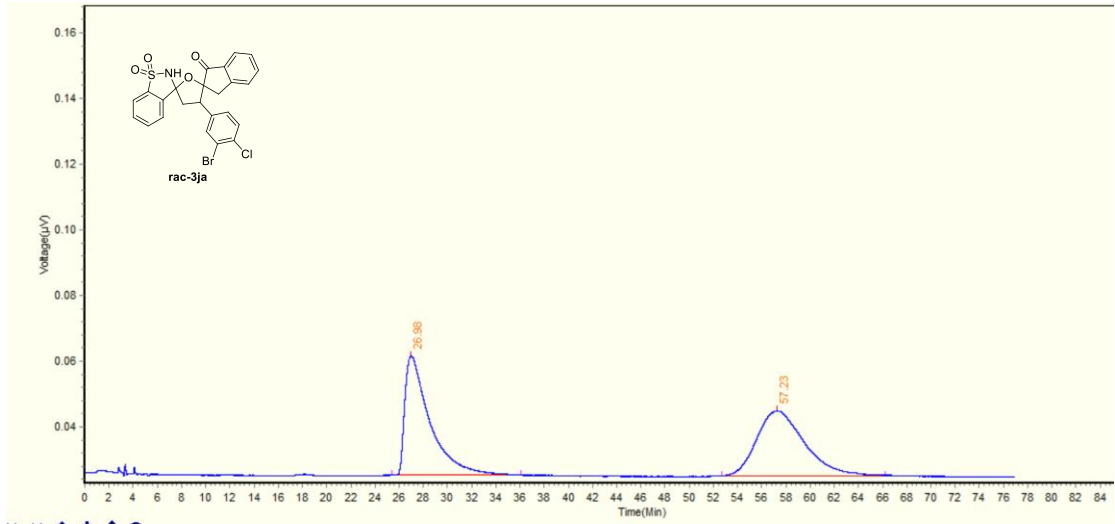

| No.   | Retention Time | Peak Area | Peak Height | Peak Area(%) | Peak Width | Peak Type |
|-------|----------------|-----------|-------------|--------------|------------|-----------|
| 1     | 26.98          | 2621357   | 18168       | 49.40%       | 10.678     | BB        |
| 2     | 57.23          | 2684537   | 9905        | 50.60%       | 13.518     | BB        |
| Total |                | 5,305,894 | 28,073      | 100.00%      |            |           |

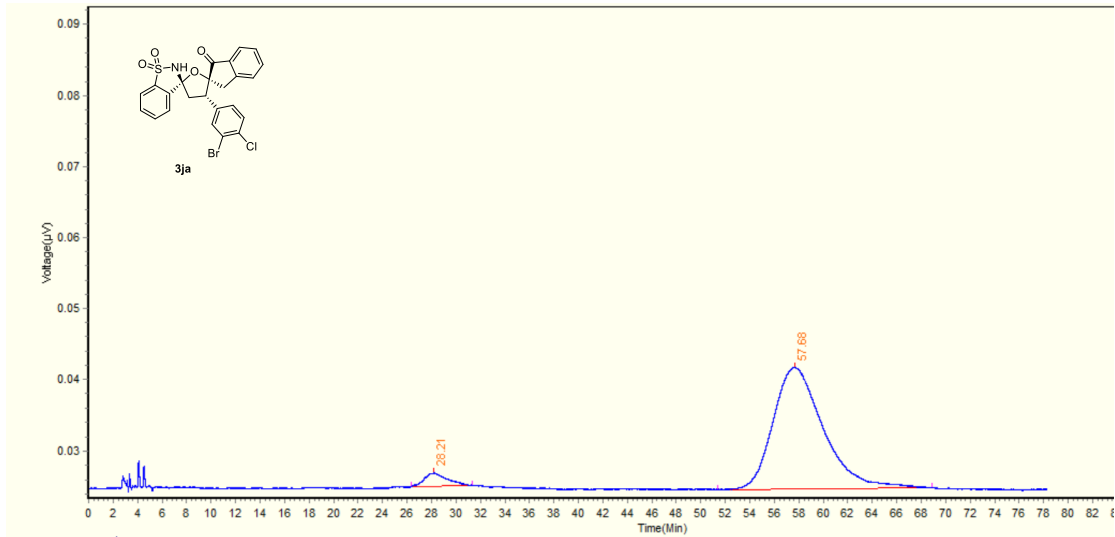

| No.   | Retention Time | Peak Area | Peak Height | Peak Area(%) | Peak Width | Peak Type |
|-------|----------------|-----------|-------------|--------------|------------|-----------|
| 1     | 28.21          | 122219    | 942         | 4.79%        | 4.988      | BB        |
| 2     | 57.68          | 2430431   | 8544        | 95.21%       | 17.503     | BB        |
| Total |                | 2,552,650 | 9,486       | 100.00%      |            |           |

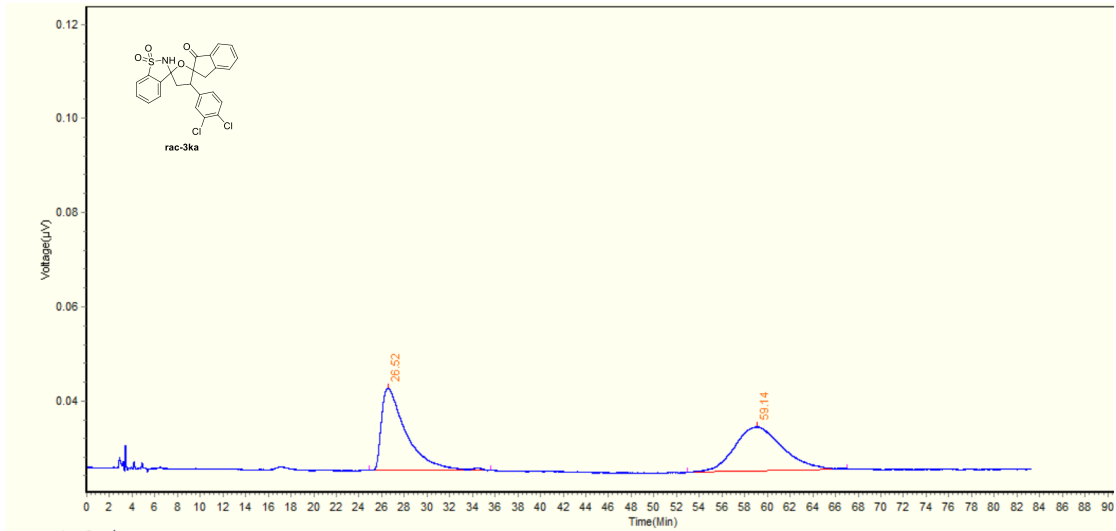

| No.   | Retention Time | PeakArea  | Peak Height | PeakArea(%) | Peak Width | Peak Type |
|-------|----------------|-----------|-------------|-------------|------------|-----------|
| 1     | 26.52          | 1318571   | 8746        | 49.17%      | 10.719     | BB        |
| 2     | 59.14          | 1363083   | 4670        | 50.83%      | 14.075     | BB        |
| Total |                | 2,681,654 | 13,416      | 100.00%     |            |           |

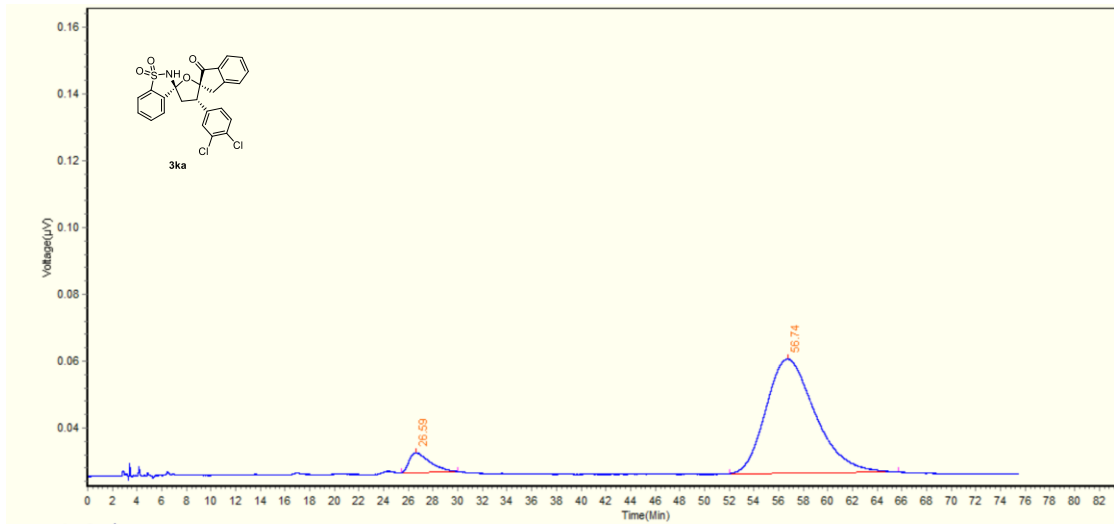

| No.   | Retention Time | PeakArea  | Peak Height | PeakArea(%) | Peak Width | Peak Type |
|-------|----------------|-----------|-------------|-------------|------------|-----------|
| 1     | 26.59          | 348839    | 2992        | 6.87%       | 4.562      | BB        |
| 2     | 56.74          | 4726777   | 17073       | 93.13%      | 13.685     | BB        |
| Total |                | 5,075,616 | 20,065      | 100.00%     |            |           |

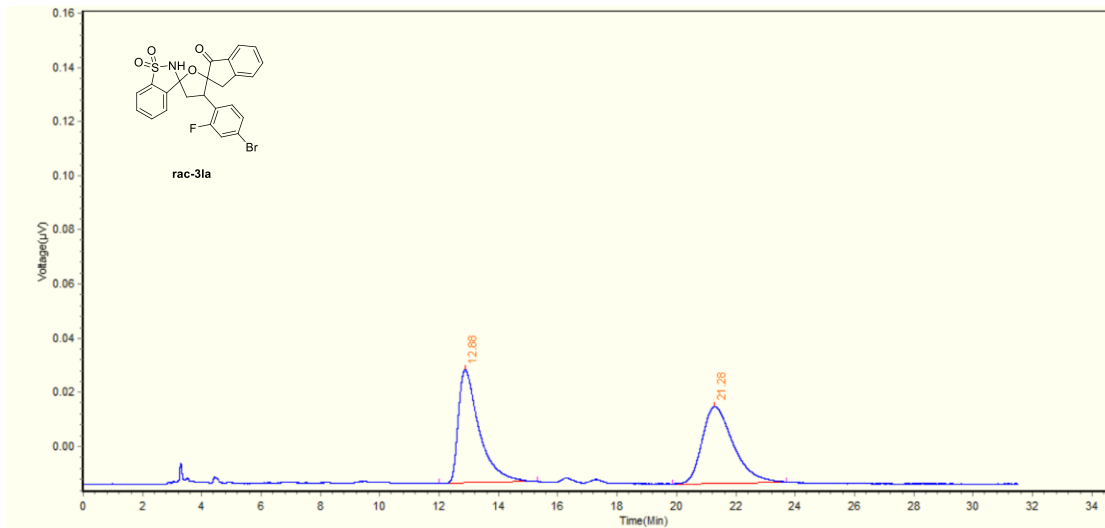

| No.   | Retention Time | Peak Area | Peak Height | Peak Area(%) | Peak Width | Peak Type |
|-------|----------------|-----------|-------------|--------------|------------|-----------|
| 1     | 12.88          | 1023868   | 20944       | 49.78%       | 3.317      | BB        |
| 2     | 21.28          | 1032722   | 14197       | 50.22%       | 3.846      | BB        |
| Total |                | 2,056,590 | 35,141      | 100.00%      |            |           |

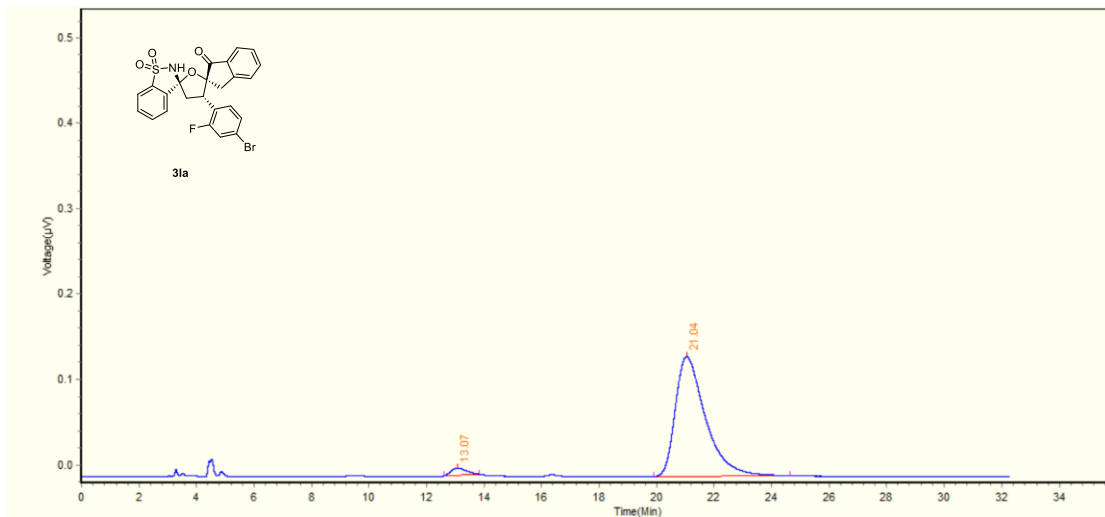

| No.   | Retention Time | Peak Area | Peak Height | Peak Area(%) | Peak Width | Peak Type |
|-------|----------------|-----------|-------------|--------------|------------|-----------|
| 1     | 13.07          | 157977    | 4195        | 3.00%        | 1.222      | BB        |
| 2     | 21.04          | 5099323   | 70023       | 97.00%       | 4.742      | BB        |
| Total |                | 5,257,300 | 74,218      | 100.00%      |            |           |

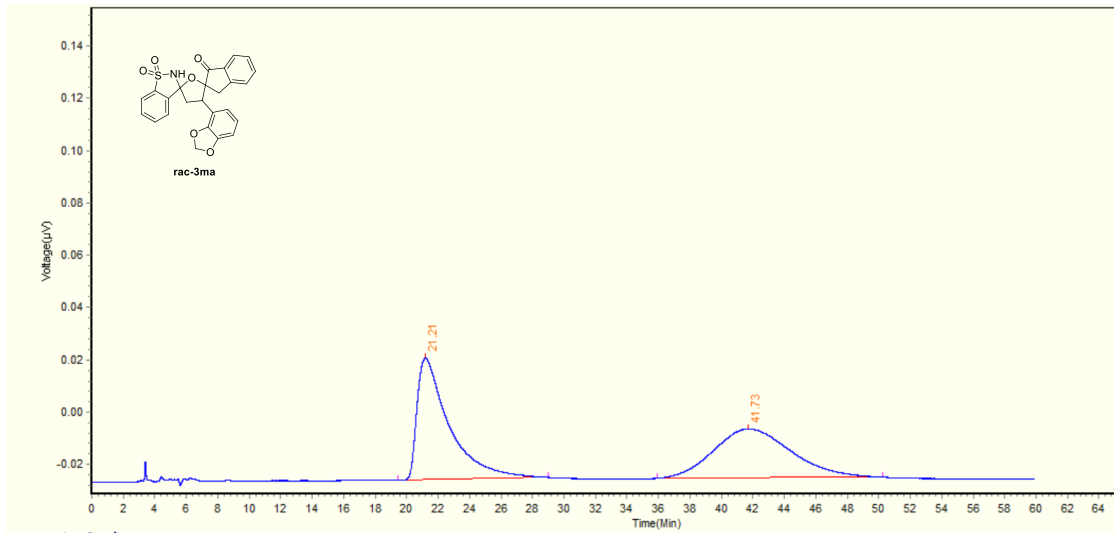

| No.   | Retention Time | Peak Area | Peak Height | Peak Area(%) | Peak Width | Peak Type |
|-------|----------------|-----------|-------------|--------------|------------|-----------|
| 1     | 21.21          | 3281319   | 23234       | 50.62%       | 9.552      | BB        |
| 2     | 41.73          | 3200740   | 9384        | 49.38%       | 14.328     | BB        |
| Total |                | 6,482,059 | 32,618      | 100.00%      |            |           |

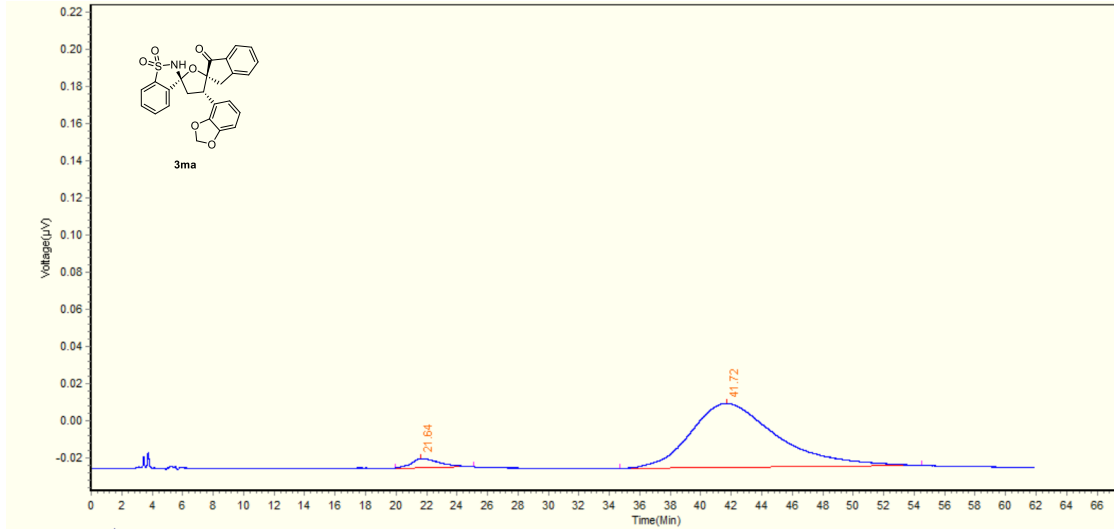

| No.   | Retention Time | Peak Area | Peak Height | Peak Area(%) | Peak Width | Peak Type |
|-------|----------------|-----------|-------------|--------------|------------|-----------|
| 1     | 21.64          | 314133    | 2446        | 4.45%        | 5.143      | BB        |
| 2     | 41.72          | 6742813   | 17208       | 95.55%       | 19.809     | BB        |
| Total |                | 7,056,946 | 19,654      | 100.00%      |            |           |

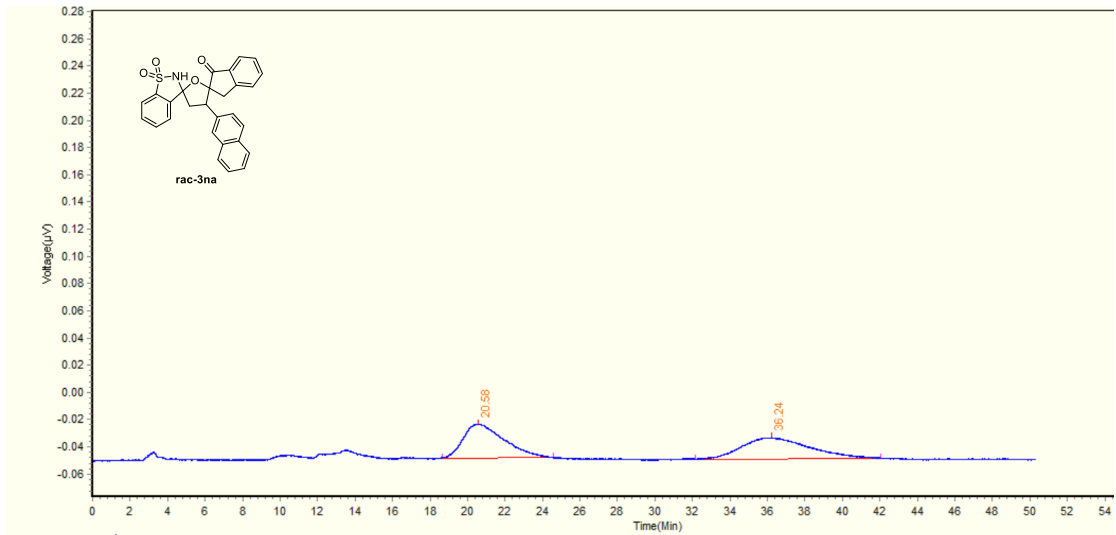

| No.   | Retention Time | Peak Area | Peak Height | Peak Area(%) | Peak Width | Peak Type |
|-------|----------------|-----------|-------------|--------------|------------|-----------|
| 1     | 20.58          | 1880103   | 12354       | 49.38%       | 5.934      | BB        |
| 2     | 36.24          | 1927069   | 7796        | 50.62%       | 9.89       | BB        |
| Total |                | 3,807,172 | 20,150      | 100.00%      |            |           |

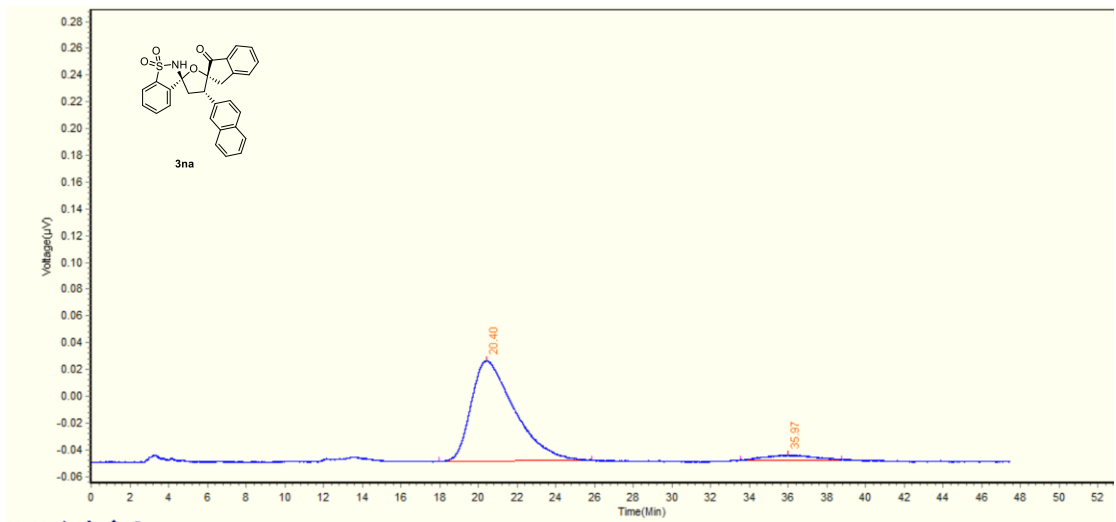

| No.   | Retention Time | Peak Area | Peak Height | Peak Area(%) | Peak Width | Peak Type |
|-------|----------------|-----------|-------------|--------------|------------|-----------|
| 1     | 20.40          | 5823355   | 37534       | 95.13%       | 7.892      | BB        |
| 2     | 35.97          | 297973    | 1882        | 4.87%        | 5.225      | BB        |
| Total |                | 6,121,328 | 39,416      | 100.00%      |            |           |

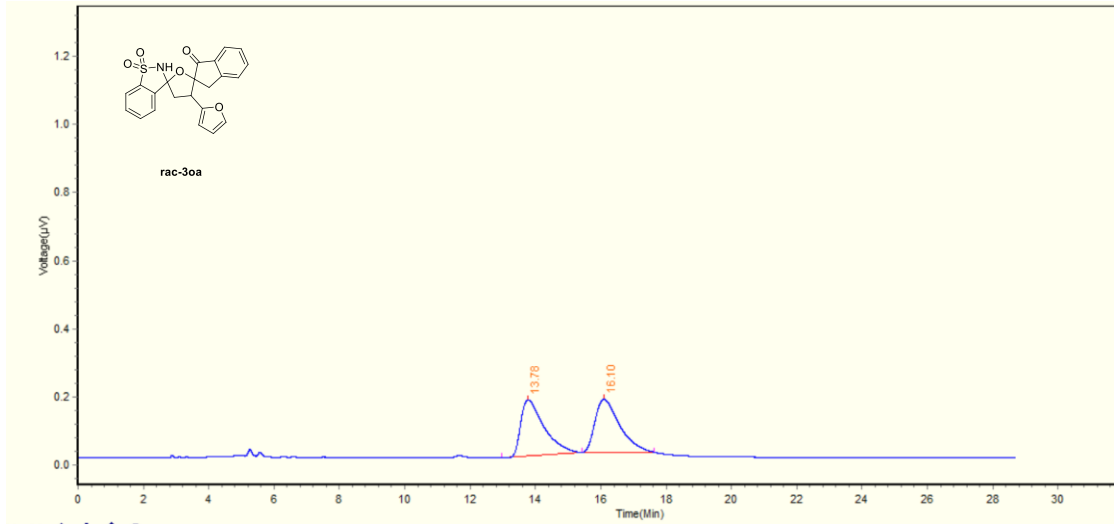

| No.   | Retention Time | Peak Area | Peak Height | Peak Area(%) | Peak Width | Peak Type |
|-------|----------------|-----------|-------------|--------------|------------|-----------|
| 1     | 13.78          | 4039657   | 82367       | 49.88%       | 2.459      | BB        |
| 2     | 16.10          | 4058881   | 77580       | 50.12%       | 2.204      | BB        |
| Total |                | 8,098,538 | 159,947     | 100.00%      |            |           |

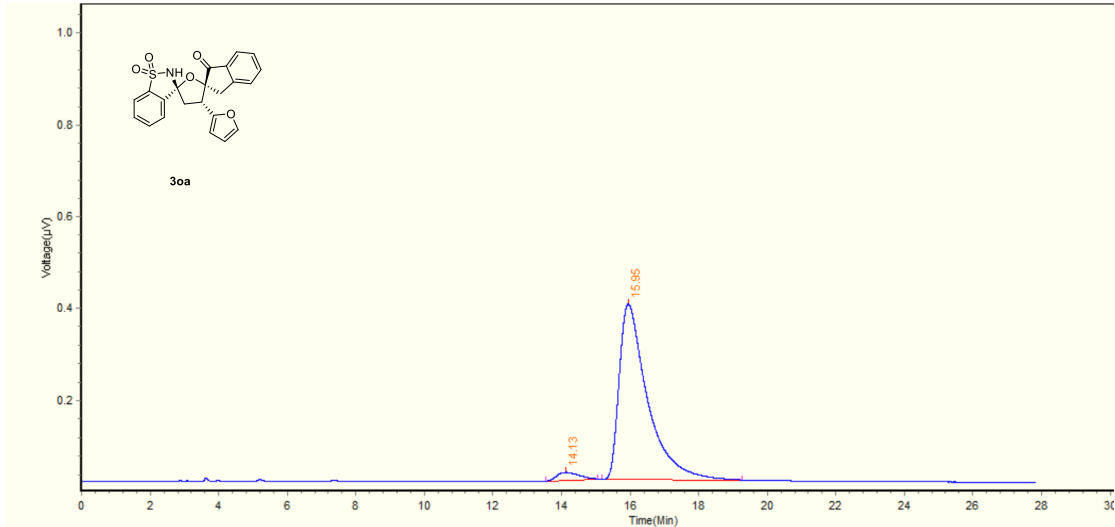

| No.   | Retention Time | Peak Area  | Peak Height | Peak Area(%) | Peak Width | Peak Type |
|-------|----------------|------------|-------------|--------------|------------|-----------|
| 1     | 14.13          | 389708     | 8712        | 3.44%        | 1.518      | BB        |
| 2     | 15.95          | 10943225   | 191137      | 96.56%       | 4.088      | BB        |
| Total |                | 11,332,933 | 199,849     | 100.00%      |            |           |

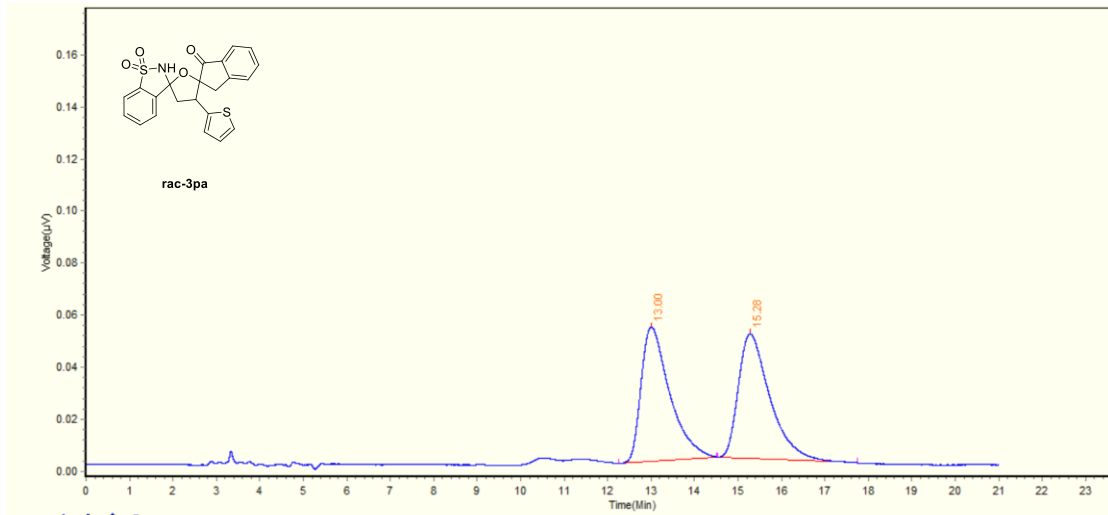

| No.   | Retention Time | Peak Area | Peak Height | Peak Area(%) | Peak Width | Peak Type |
|-------|----------------|-----------|-------------|--------------|------------|-----------|
| 1     | 13.00          | 1175099   | 25774       | 49.27%       | 2.254      | BB        |
| 2     | 15.28          | 1210155   | 23935       | 50.73%       | 3.216      | BB        |
| Total |                | 2,385,254 | 49,709      | 100.00%      |            |           |

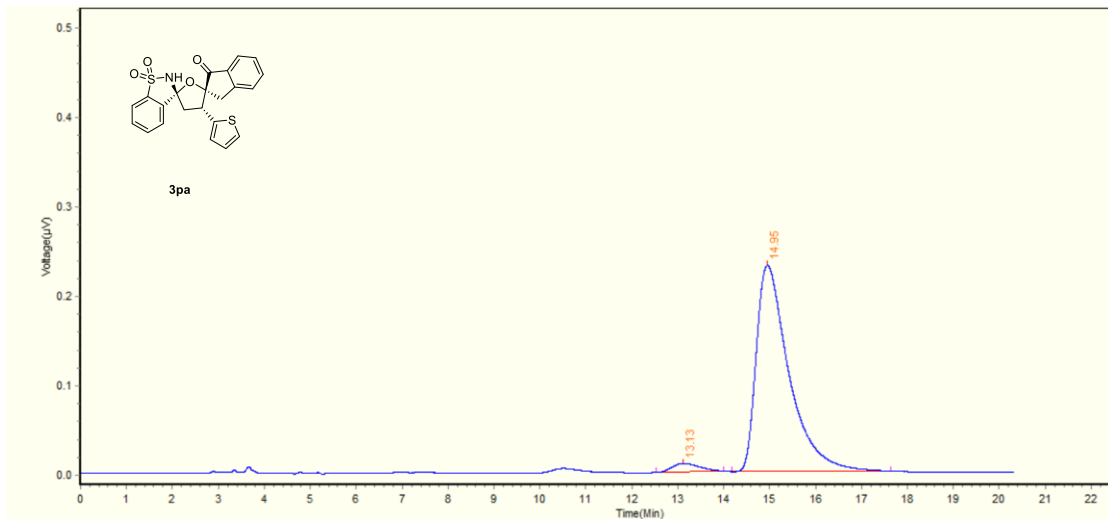

| No.   | Retention Time | Peak Area | Peak Height | Peak Area(%) | Peak Width | Peak Type |
|-------|----------------|-----------|-------------|--------------|------------|-----------|
| 1     | 13.13          | 199031    | 4825        | 3.37%        | 1.47       | BB        |
| 2     | 14.95          | 5701893   | 115160      | 96.63%       | 3.46       | BB        |
| Total |                | 5,900,924 | 119,985     | 100.00%      |            |           |



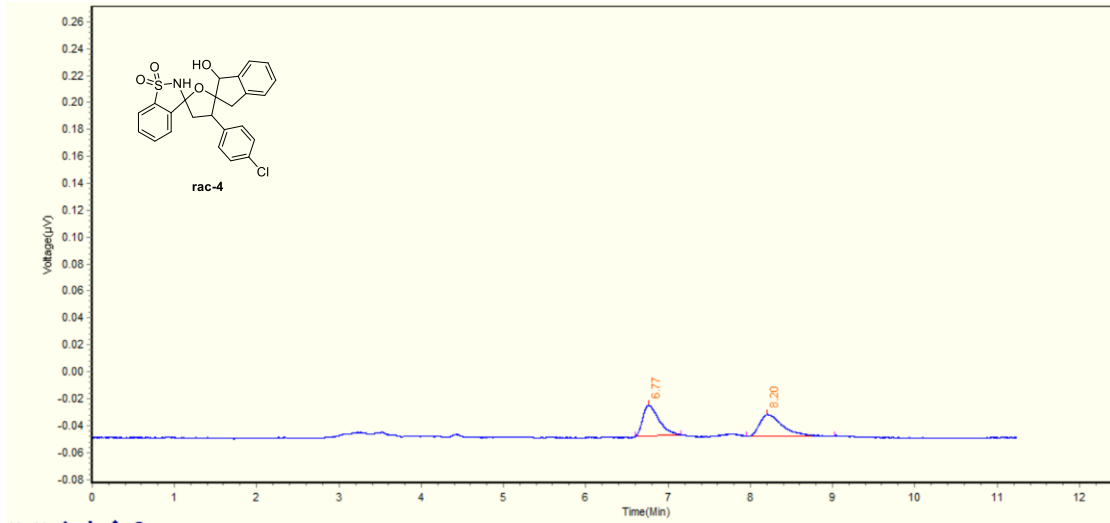

| No.   | Retention Time | Peak Area | Peak Height | Peak Area(%) | Peak Width | Peak Type |
|-------|----------------|-----------|-------------|--------------|------------|-----------|
| 1     | 6.77           | 155328    | 11430       | 50.43%       | 0.556      | BB        |
| 2     | 8.20           | 152650    | 7978        | 49.57%       | 1.073      | BB        |
| Total |                | 307,978   | 19,408      | 100.00%      |            |           |

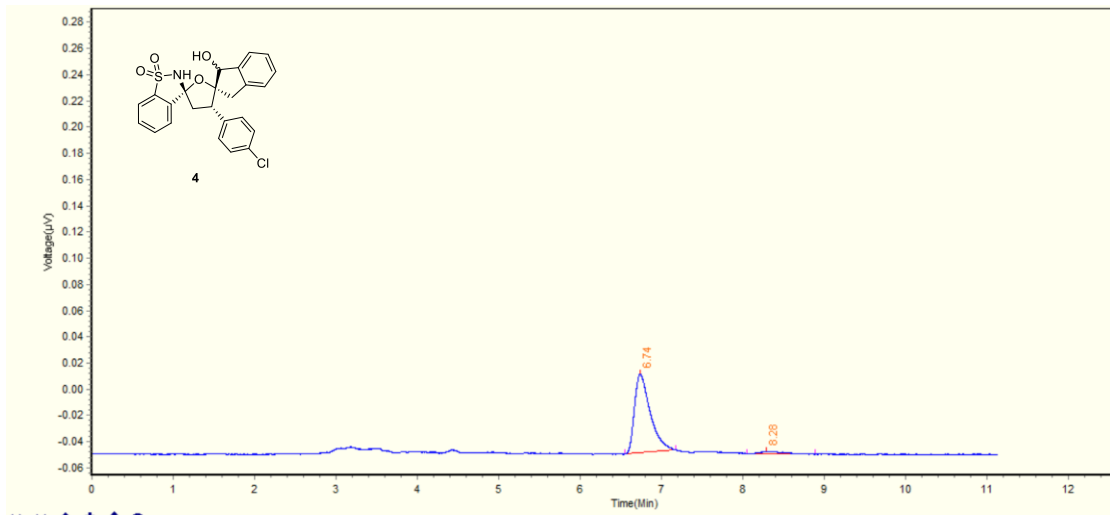

| No.   | Retention Time | Peak Area | Peak Height | Peak Area(%) | Peak Width | Peak Type |
|-------|----------------|-----------|-------------|--------------|------------|-----------|
| 1     | 6.74           | 402690    | 30036       | 95.49%       | 0.625      | BB        |
| 2     | 8.28           | 19014     | 985         | 4.51%        | 0.837      | BB        |
| Total |                | 421,704   | 31,021      | 100.00%      |            |           |

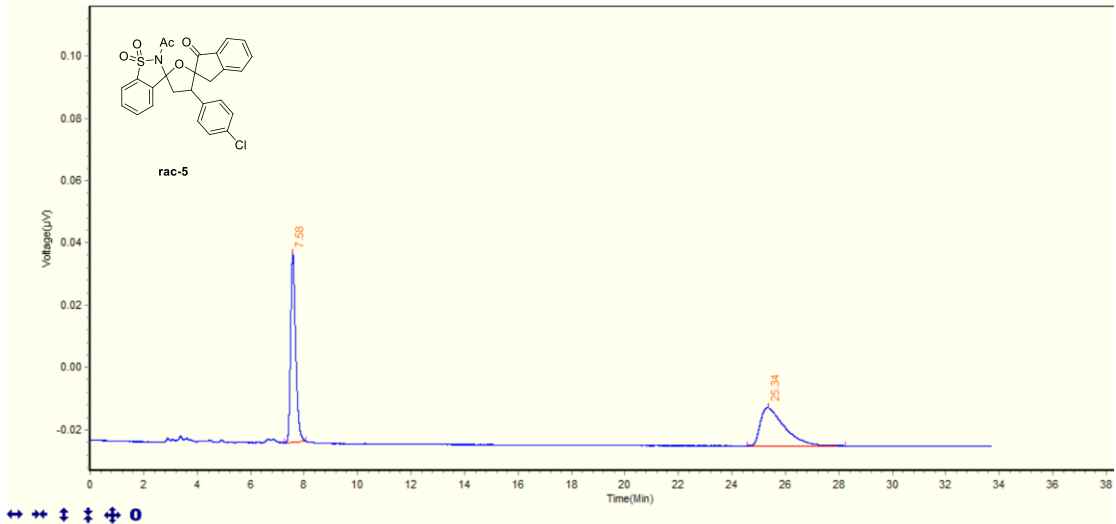

| No.          | Retention Time | Peak Area      | Peak Height   | Peak Area(%)   | Peak Width | Peak Type |
|--------------|----------------|----------------|---------------|----------------|------------|-----------|
| 1            | 7.58           | 396672         | 30306         | 50.77%         | 0.795      | BB        |
| 2            | 25.34          | 384568         | 6121          | 49.23%         | 3.672      | BB        |
| <b>Total</b> |                | <b>781,240</b> | <b>36,427</b> | <b>100.00%</b> |            |           |

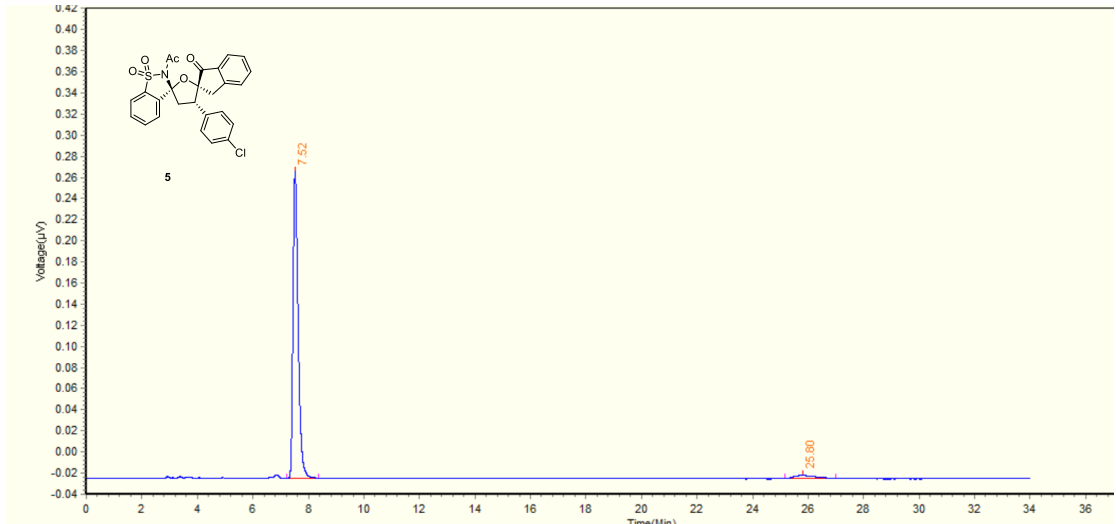

| No.          | Retention Time | Peak Area        | Peak Height    | Peak Area(%)   | Peak Width | Peak Type |
|--------------|----------------|------------------|----------------|----------------|------------|-----------|
| 1            | 7.52           | 1875111          | 145154         | 96.01%         | 1.146      | BB        |
| 2            | 25.80          | 78003            | 1485           | 3.99%          | 1.833      | BB        |
| <b>Total</b> |                | <b>1,953,114</b> | <b>146,639</b> | <b>100.00%</b> |            |           |



---

The following ALERTS were generated. Each ALERT has the format

**test-name\_ALERT\_alert-type\_alert-level.**

Click on the hyperlinks for more details of the test.

---

**Alert level C**

|                   |                                         |       |   |       |        |
|-------------------|-----------------------------------------|-------|---|-------|--------|
| PLAT234_ALERT_4_C | Large Hirshfeld Difference C16          | --C17 | . | 0.17  | Anq.   |
| PLAT341_ALERT_3_C | Low Bond Precision on C-C Bonds .....   |       |   | 0.013 | Anq.   |
| PLAT911_ALERT_3_C | Missing FCF Refl Between Thmin & STh/L= | 0.600 |   | 10    | Report |

---

**Alert level G**

|                   |                                                  |               |  |     |              |
|-------------------|--------------------------------------------------|---------------|--|-----|--------------|
| PLAT002_ALERT_2_G | Number of Distance or Angle Restraints on AtSite |               |  | 2   | Note         |
| PLAT012_ALERT_1_G | No _shelx_res_checksum Found in CIF .....        |               |  |     | Please Check |
| PLAT172_ALERT_4_G | The CIF-Embedded .res File Contains DFIX Records |               |  | 1   | Report       |
| PLAT199_ALERT_1_G | Reported _cell_measurement_temperature .....     | (K)           |  | 293 | Check        |
| PLAT200_ALERT_1_G | Reported _diffn_ambient_temperature .....        | (K)           |  | 293 | Check        |
| PLAT791_ALERT_4_G | Model has Chirality at C7                        | (Sohnke SpGr) |  | R   | Verify       |
| PLAT791_ALERT_4_G | Model has Chirality at C9                        | (Sohnke SpGr) |  | S   | Verify       |
| PLAT791_ALERT_4_G | Model has Chirality at C10                       | (Sohnke SpGr) |  | R   | Verify       |
| PLAT860_ALERT_3_G | Number of Least-Squares Restraints .....         |               |  | 1   | Note         |
| PLAT912_ALERT_4_G | Missing # of FCF Reflections Above STh/L=        | 0.600         |  | 75  | Note         |
| PLAT941_ALERT_3_G | Average HKL Measurement Multiplicity .....       |               |  | 3.5 | Low          |
| PLAT978_ALERT_2_G | Number C-C Bonds with Positive Residual Density. |               |  | 0   | Info         |

---

0 **ALERT level A** = Most likely a serious problem - resolve or explain  
0 **ALERT level B** = A potentially serious problem, consider carefully  
3 **ALERT level C** = Check. Ensure it is not caused by an omission or oversight  
12 **ALERT level G** = General information/check it is not something unexpected

3 ALERT type 1 CIF construction/syntax error, inconsistent or missing data  
2 ALERT type 2 Indicator that the structure model may be wrong or deficient  
4 ALERT type 3 Indicator that the structure quality may be low  
6 ALERT type 4 Improvement, methodology, query or suggestion  
0 ALERT type 5 Informative message, check

---

It is advisable to attempt to resolve as many as possible of the alerts in all categories. Often the minor alerts point to easily fixed oversights, errors and omissions in your CIF or refinement strategy, so attention to these fine details can be worthwhile. In order to resolve some of the more serious problems it may be necessary to carry out additional measurements or structure refinements. However, the purpose of your study may justify the reported deviations and the more serious of these should normally be commented upon in the discussion or experimental section of a paper or in the "special\_details" fields of the CIF. checkCIF was carefully designed to identify outliers and unusual parameters, but every test has its limitations and alerts that are not important in a particular case may appear. Conversely, the absence of alerts does not guarantee there are no aspects of the results needing attention. It is up to the individual to critically assess their own results and, if necessary, seek expert advice.

### Publication of your CIF in IUCr journals

A basic structural check has been run on your CIF. These basic checks will be run on all CIFs submitted for publication in IUCr journals (*Acta Crystallographica*, *Journal of Applied Crystallography*, *Journal of Synchrotron Radiation*); however, if you intend to submit to *Acta Crystallographica Section C* or *E* or *IUCrData*, you should make sure that full publication checks are run on the final version of your CIF prior to submission.

### Publication of your CIF in other journals

Please refer to the *Notes for Authors* of the relevant journal for any special instructions relating to CIF submission.
